# Supplementary material for: The genome of Mesobuthus martensii reveals a unique adaptation model of arthropods
Source: PubMed Central journal article supplement — Nat Commun. 2013 Oct 15;4:2602. doi: 10.1038/ncomms3602 (PMC3826648; doi:10.1038/ncomms3602), 2013-10-15
Supplement: ncomms3602-s1.pdf [file ncomms3602-s1.pdf]

## **Supplementary Information**

## Table of Contents

|                                                                                                                                                                                                                  |          |
|------------------------------------------------------------------------------------------------------------------------------------------------------------------------------------------------------------------|----------|
| <b>Supplementary Figures</b> .....                                                                                                                                                                               | <b>6</b> |
| <i>Supplementary Figure S1 Genome size determination of the scorpion <i>M. martensii</i> by flow cytometry analysis of fluorescently stained nuclei using chicken erythrocytes as an internal standard</i> ..... | 6        |
| <i>Supplementary Figure S2 Number of different types of SSR from the <i>M. martensii</i> genome</i> .....                                                                                                        | 7        |
| <i>Supplementary Figure S3 Gene prediction pipeline for the <i>M. martensii</i> genome</i> .....                                                                                                                 | 8        |
| <i>Supplementary Figure S4 Gene Ontology categories of predicted genes</i> .....                                                                                                                                 | 9        |
| <i>Supplementary Figure S5 KEGG map of predicted genes of <i>M. martensii</i></i> .....                                                                                                                          | 10       |
| <i>Supplementary Figure S6 Distributions of gene expression</i> .....                                                                                                                                            | 11       |
| <i>Supplementary Figure S7 Intron length distribution for genes of <i>M. martensii</i></i> .....                                                                                                                 | 12       |
| <i>Supplementary Figure S8 Phylogenetic tree of eukaryotic core gene families</i> .....                                                                                                                          | 13       |
| <i>Supplementary Figure S9 KEGG map of expanded gene families from <i>M. martensii</i></i> .....                                                                                                                 | 14       |
| <i>Supplementary Figure S10 Repertoire of venom neurotoxin genes annotated in the <i>M. martensii</i> genome</i> .....                                                                                           | 15       |
| <i>Supplementary Figure S11 Sequences of new NaTx neurotoxins discovered from the <i>M. martensii</i> genome</i> .....                                                                                           | 16       |
| <i>Supplementary Figure S12 Sequences of new KTx neurotoxins discovered from the <i>M. martensii</i> genome</i> .....                                                                                            | 17       |
| <i>Supplementary Figure S13 Multiple sequence alignments of ClTx neurotoxins characterized from the <i>M. martensii</i> genome</i> .....                                                                         | 18       |
| <i>Supplementary Figure S14 Multiple sequence alignments of CaTx neurotoxins characterized from the <i>M. martensii</i> genome</i> .....                                                                         | 19       |
| <i>Supplementary Figure S15 Organization and structure of two representative NaTx neurotoxin genes from the scorpion <i>M. martensii</i></i> .....                                                               | 20       |
| <i>Supplementary Figure S16 Organization and structure of two representative KTx neurotoxin genes from the scorpion <i>M. martensii</i></i> .....                                                                | 21       |
| <i>Supplementary Figure S17 Multiple sequence alignments of new defensins characterized from the <i>M. martensii</i> genome</i> .....                                                                            | 22       |
| <i>Supplementary Figure S18 Organization and structure of two representative defensin genes discovered in the scorpion <i>M. martensii</i></i> .....                                                             | 23       |
| <i>Supplementary Figure S19 Sequence alignments of scorpion potassium channel and mouse Kv1.3 (GI, 1345815) transmembrane regions</i> .....                                                                      | 24       |
| <i>Supplementary Figure S20 Identification of functional scorpion <math>K^+</math> channels</i> .....                                                                                                            | 25       |

|                                                                                                                                                                              |           |
|------------------------------------------------------------------------------------------------------------------------------------------------------------------------------|-----------|
| <i>Supplementary Figure S21 Multiple sequence alignments of opsins' transmembrane regions.....</i>                                                                           | <i>26</i> |
| <i>Supplementary Figure S22 Quantitative expression analysis of phototransduction pathway genes in the tail (vesicle) of the scorpion M. martensii.....</i>                  | <i>27</i> |
| <i>Supplementary Figure S23 Nervous system of scorpions.....</i>                                                                                                             | <i>28</i> |
| <i>Supplementary Figure S24 Product ion spectrum and LC-ESI-MS/MS (MRM mode) of coumarin standard.....</i>                                                                   | <i>29</i> |
| <i>Supplementary Figure S25 Product ion spectrum and LC-ESI-MS/MS of 7-hydroxy-coumarin standard.....</i>                                                                    | <i>30</i> |
| <i>Supplementary Figure S26 Product ion spectrum and LC-ESI-MS/MS (MRM mode) chromatogram of 4-methyl-7-hydroxy-coumarin standard.....</i>                                   | <i>31</i> |
| <i>Supplementary Figure S27 Fluorescence spectra of coumarin and its derivative standards.....</i>                                                                           | <i>32</i> |
| <i>Supplementary Figure S28 Detection of coumarin, 7-hydroxy-coumarin, and 4-methyl-7-hydroxy-coumarin in the ethanol solution of 4-methyl-7-hydroxy-coumarin standard..</i> | <i>33</i> |
| <i>Supplementary Figure S29 KEGG maps of the biosynthetic pathways for juvenile hormone and molting hormone in the scorpion M. martensii. ....</i>                           | <i>34</i> |
| <b>Supplementary Tables .....</b>                                                                                                                                            | <b>35</b> |
| <i>Supplementary Table S1 C-value and genome size of M. martensii determined by flow cytometry.</i>                                                                          | <i>35</i> |
| <i>Supplementary Table S2 Statistics of raw sequence data from different Illumina libraries. ....</i>                                                                        | <i>35</i> |
| <i>Supplementary Table S3 Statistics of genome assembly v1.0 for M. martensii.....</i>                                                                                       | <i>36</i> |
| <i>Supplementary Table S4 Sample of simple repeats in the M. martensii genome.....</i>                                                                                       | <i>37</i> |
| <i>Supplementary Table S5 Samples of transposable elements in the M. martensii genome. ....</i>                                                                              | <i>38</i> |
| <i>Supplementary Table S6 Single nucleotide polymorphism in the diploid.....</i>                                                                                             | <i>41</i> |
| <i>Supplementary Table S7 Statistics of gene models of M. martensii minimum protein coding genes. ....</i>                                                                   | <i>41</i> |
| <i>Supplementary Table S8 Summary of potential alternatively spliced genes in M. martensii. ....</i>                                                                         | <i>41</i> |
| <i>Supplementary Table S9 Species used for comparative genomics analysis in the present study. ....</i>                                                                      | <i>42</i> |
| <i>Supplementary Table S10 The number of expanded gene family and large gene family. ....</i>                                                                                | <i>42</i> |
| <i>Supplementary Table S11 Ten annotated expanded gene family in the M. martensii genome. ....</i>                                                                           | <i>43</i> |
| <i>Supplementary Table S12 Neurotoxin genes characterized from the M. martensii genome. ....</i>                                                                             | <i>44</i> |
| <i>Supplementary Table S13 Neurotoxin and defensin gene clusters summarized from the M. martensii genome.....</i>                                                            | <i>47</i> |
| <i>Supplementary Table S14 Six new defensin genes discovered from the M. martensii genome. ....</i>                                                                          | <i>48</i> |
| <i>Supplementary Table S15 Death of the cockroach B. dubia injected with fresh venom from M. martensii.....</i>                                                              | <i>48</i> |

|                                                                                                                                      |           |
|--------------------------------------------------------------------------------------------------------------------------------------|-----------|
| <i>Supplementary Table S16 Death of the scorpion M. martensii injected with its own fresh venom...</i>                               | 49        |
| <i>Supplementary Table S17 Genes involved in the phototransduction pathway in the M. martensii genome.....</i>                       | 50        |
| <i>Supplementary Table S18 Phototransduction pathway related-genes expressed in the tail of M. martensii.....</i>                    | 53        |
| <i>Supplementary Table S19 Primers used for qPCR to quantitatively detect the expression of phototransduction pathway genes.....</i> | 57        |
| <i>Supplementary Table S20 Sequences used for opsin phylogenetic and light-wavelength bias analyses.....</i>                         | 58        |
| <i>Supplementary Table S21 CYP genes encoding P450 enzymes annotated from the genome of M. martensii.....</i>                        | 61        |
| <i>Supplementary Table S22 Comparison of CYP gene numbers in insects, crustacean, mite, and scorpion.....</i>                        | 65        |
| <i>Supplementary Table S23 CYP gene clusters summarized from the M. martensii genome.....</i>                                        | 66        |
| <i>Supplementary Table S24 Genes involved in juvenile hormone and molting hormone biosynthesis pathways in M. martensii.....</i>     | 68        |
| <b>Supplementary Notes.....</b>                                                                                                      | <b>69</b> |
| <b>Supplementary Note 1. Genome assembly, gene features and transcriptome analysis .....</b>                                         | <b>69</b> |
| <i>Animals.....</i>                                                                                                                  | 69        |
| <i>DNA and RNA preparation.....</i>                                                                                                  | 69        |
| <i>Flow cytometry analysis.....</i>                                                                                                  | 70        |
| <i>Genome shotgun sequencing and assembly.....</i>                                                                                   | 70        |
| <i>Analysis of microsatellite DNA and transposable elements (TEs).....</i>                                                           | 71        |
| <i>Single nucleotide polymorphism (SNP) and INDEL in the diploid.....</i>                                                            | 71        |
| <i>Gene modeling and annotation.....</i>                                                                                             | 72        |
| <i>Evidence for predicted gene models.....</i>                                                                                       | 74        |
| <i>Analysis of putative alternatively spliced genes.....</i>                                                                         | 75        |
| <b>Supplementary Note 2. Comparative genomics and evolution .....</b>                                                                | <b>75</b> |
| <i>Dataset collection and phylogenetic tree construction.....</i>                                                                    | 75        |
| <i>Orthologous clustering and comparative genomics.....</i>                                                                          | 76        |
| <b>Supplementary Note 3 Expansion of shared and lineage-specific gene families .....</b>                                             | <b>77</b> |
| <i>Expansion of M. martensii gene families.....</i>                                                                                  | 77        |
| <i>Synonymous mutation of gene paralog in M. martensii.....</i>                                                                      | 78        |

|                                                                                                        |           |
|--------------------------------------------------------------------------------------------------------|-----------|
| <b>Supplementary Note 4. Genetic diversity of venom neurotoxins and their receptors.....</b>           | <b>79</b> |
| <i>Biodiversity of neurotoxin genes.....</i>                                                           | 79        |
| <i>Organization and structure of neurotoxin genes.....</i>                                             | 79        |
| <i>New defensin genes and their structural organization.....</i>                                       | 80        |
| <i>Origin and evolution of neurotoxin genes.....</i>                                                   | 80        |
| <i>Resistance of M. martensii to its own venom.....</i>                                                | 81        |
| <i>Cloning and sequencing of the scorpion K<sup>+</sup> ion channels.....</i>                          | 81        |
| <i>Expression and electrophysiological recordings.....</i>                                             | 82        |
| <b>Supplementary Note 5. Genetic basis for photosensor function in the tail.....</b>                   | <b>82</b> |
| <i>Genes involved in phototransduction in the genome.....</i>                                          | 82        |
| <i>Expression of phototransduction genes in scorpion tails.....</i>                                    | 82        |
| <i>Quantitative expression analysis of phototransduction pathway genes.....</i>                        | 83        |
| <i>Evolution and light-wavelength bias of opsins.....</i>                                              | 83        |
| <b>Supplementary Note 6. P450 genes in detoxification, fluorescence and hormone biosynthesis .....</b> | <b>84</b> |
| <i>CYP genes encoding P450 enzymes.....</i>                                                            | 84        |
| <i>Coumarin and its derivatives.....</i>                                                               | 84        |
| <i>CYP genes involved in juvenile and molting hormone biosynthesis.....</i>                            | 85        |
| <b>Supplementary References.....</b>                                                                   | <b>87</b> |

## Supplementary Figures

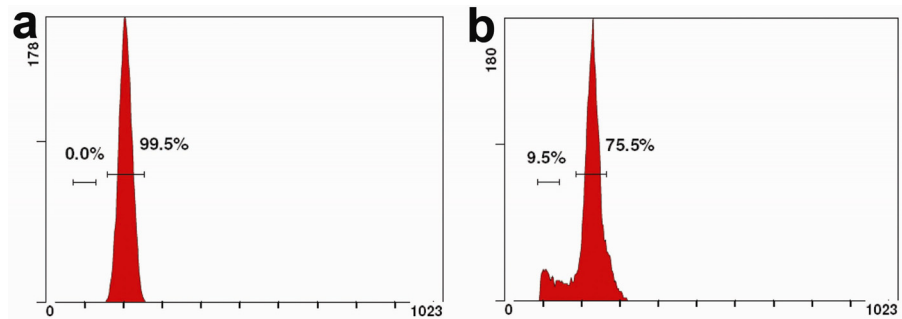

**Supplementary Figure S1 Genome size determination of the scorpion *M. martensii* by flow cytometry analysis of fluorescently stained nuclei using chicken erythrocytes as an internal standard.**

a, Chicken erythrocytes. b, Scorpion genital gland tissues. X-axis and Y axis show the relative fluorescence and the number of nuclei, respectively.

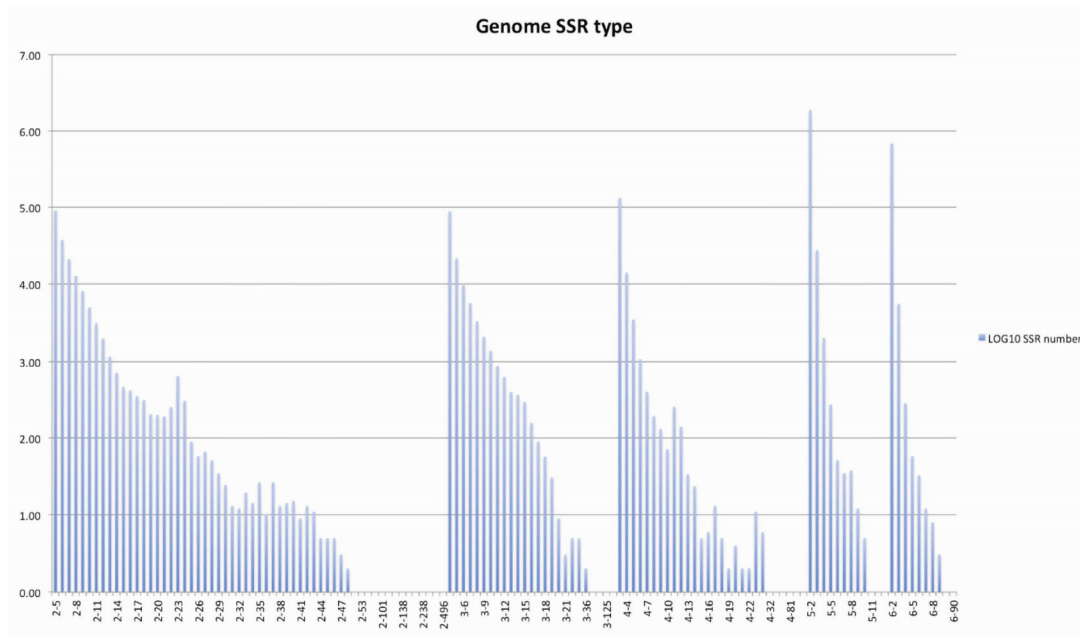

**Supplementary Figure S2 Number of different types of SSR from the *M. martensii* genome.**

The x-axis represents the type of SSR, that is, '2-6' represents dinucleotide repeats - 6 repeats. The y-axis represents the log10-transformed number of each SSR type.

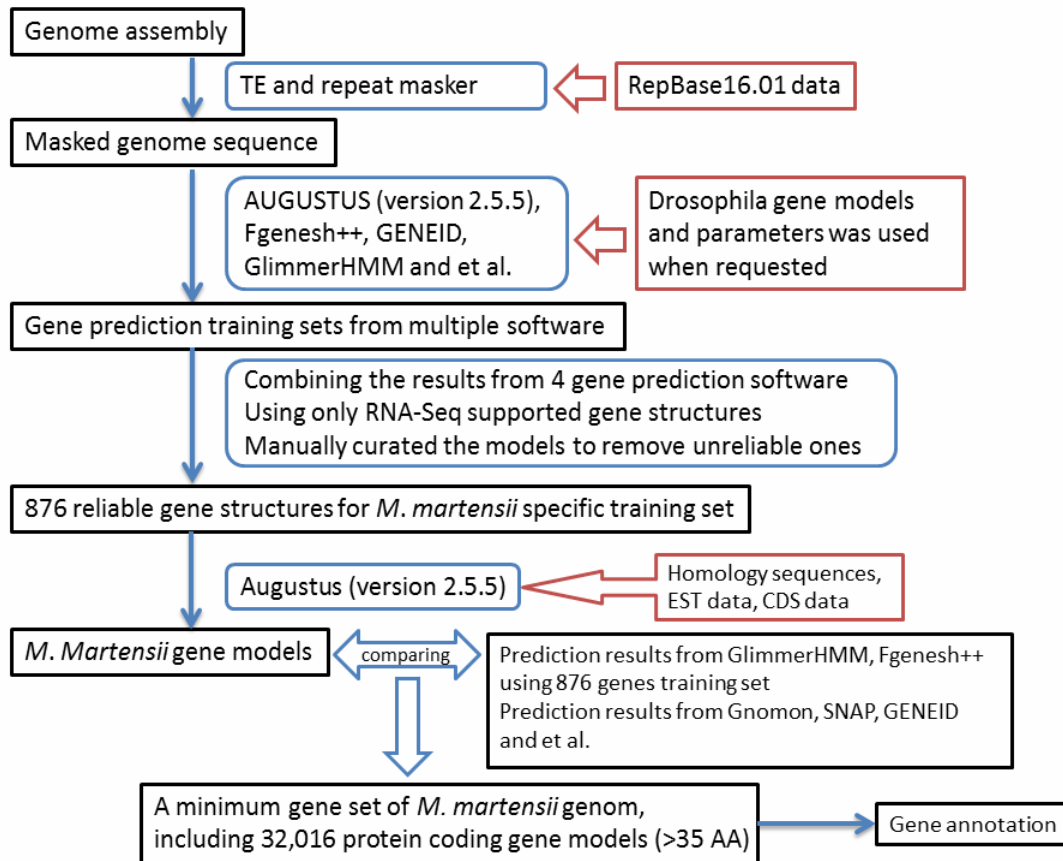

**Supplementary Figure S3 Gene prediction pipeline for the *M. martensii* genome.**

This figure illustrated the workflow used to predict *M. martensii* gene models. The black boxes represent the major income and outcome. The blue boxes represent the software used in the workflow. The red boxes represent the parameters and dataset required.



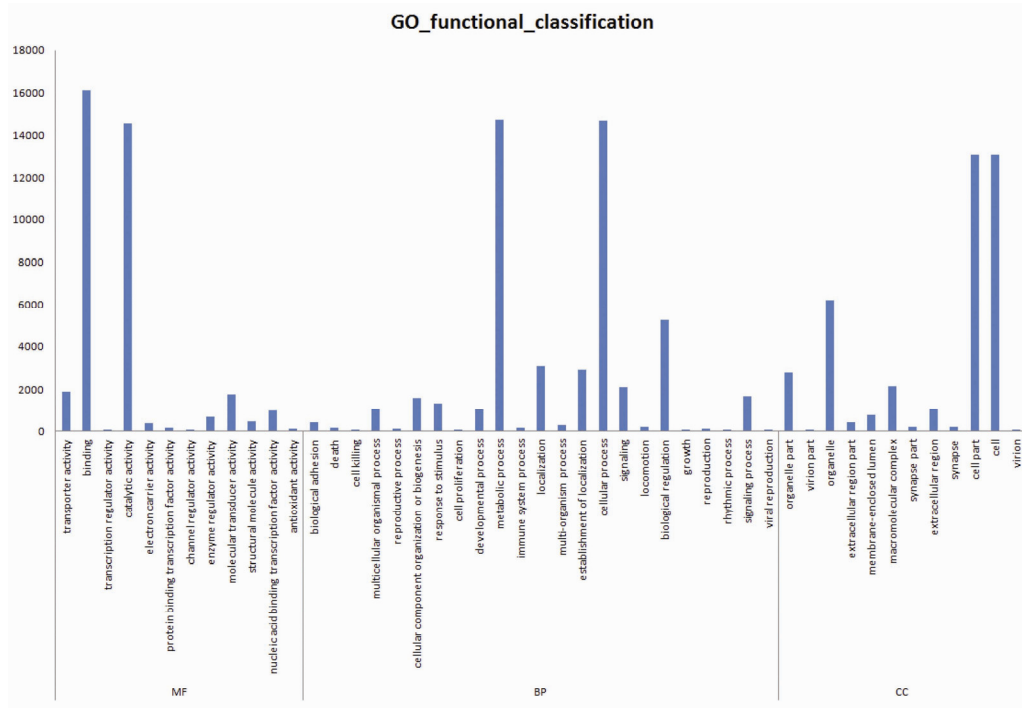

**Supplementary Figure S4 Gene Ontology categories of predicted genes.**

Gene Ontology (GO) annotation of predicted scorpion genes was conducted using GO annotation of homology sequences from the SwissProt, TrEMBL, and NCBI NR databases. The figure illustrates the number of genes from major GO modules of molecular function (MF), biological process (BP), and cellular component (CC).

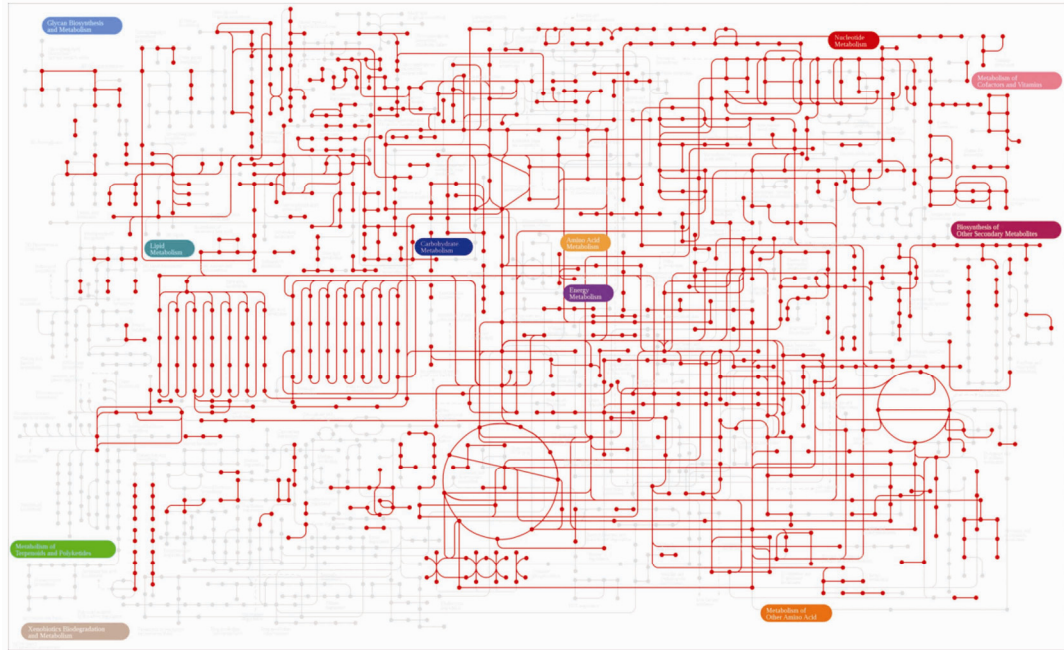

**Supplementary Figure S5 KEGG map of predicted genes of *M. martensii*.**

The figure was made by Kyoto Encyclopedia of Genes and Genomes (KEGG) Mapper – Color Pathway tools (<http://www.genome.jp/kegg>). This figure shows the genes involved in the metabolism pathways of *M. martensii*. The read lines represent the enzymes which are coded by genes existed in *M. martensii* genome.

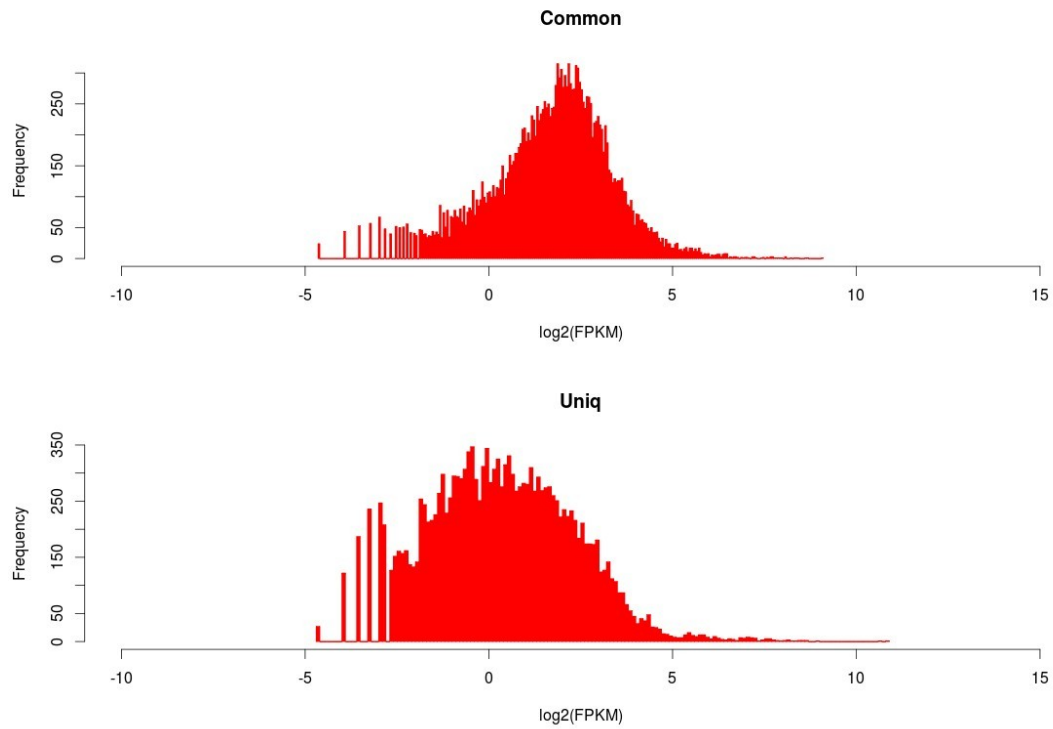

### **Supplementary Figure S6 Distributions of gene expression.**

The distribution of the shared and *Mesobuthus*-specific genes expression levels measured with RPKM. Illumina Solexa Hiseq 2000 sequencing data from mixed tissues were mapped onto predicted gene model with Tophat. The RPKM values were calculated with Cufflinks. The x-axis represents the Log<sub>2</sub> transferred RPKM value of each gene. The classification of genes were determined with MCL clustering results.

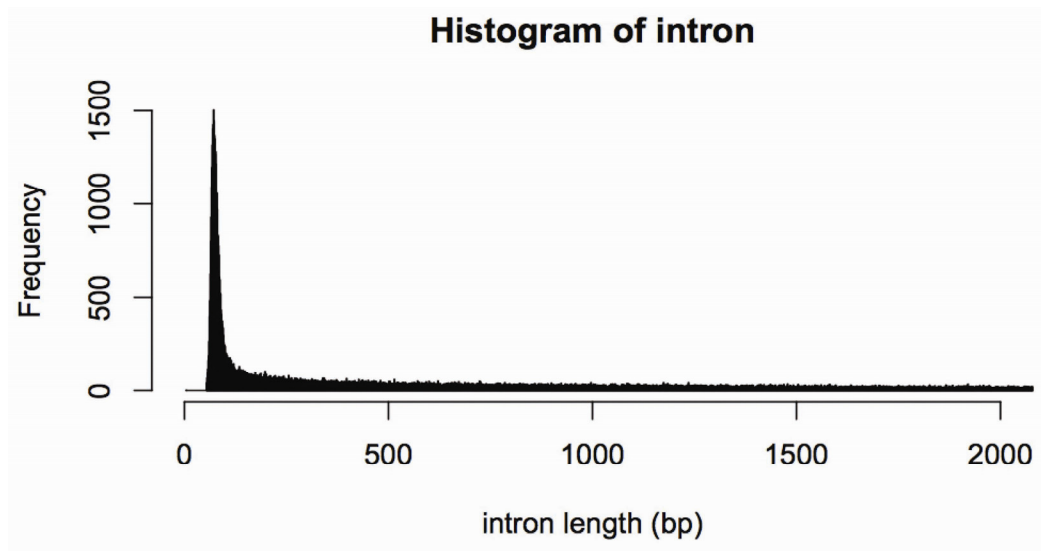

**Supplementary Figure S7 Intron length distribution for genes of *M. martensii*.**

The average intron size is approximately 2.12 Kb.

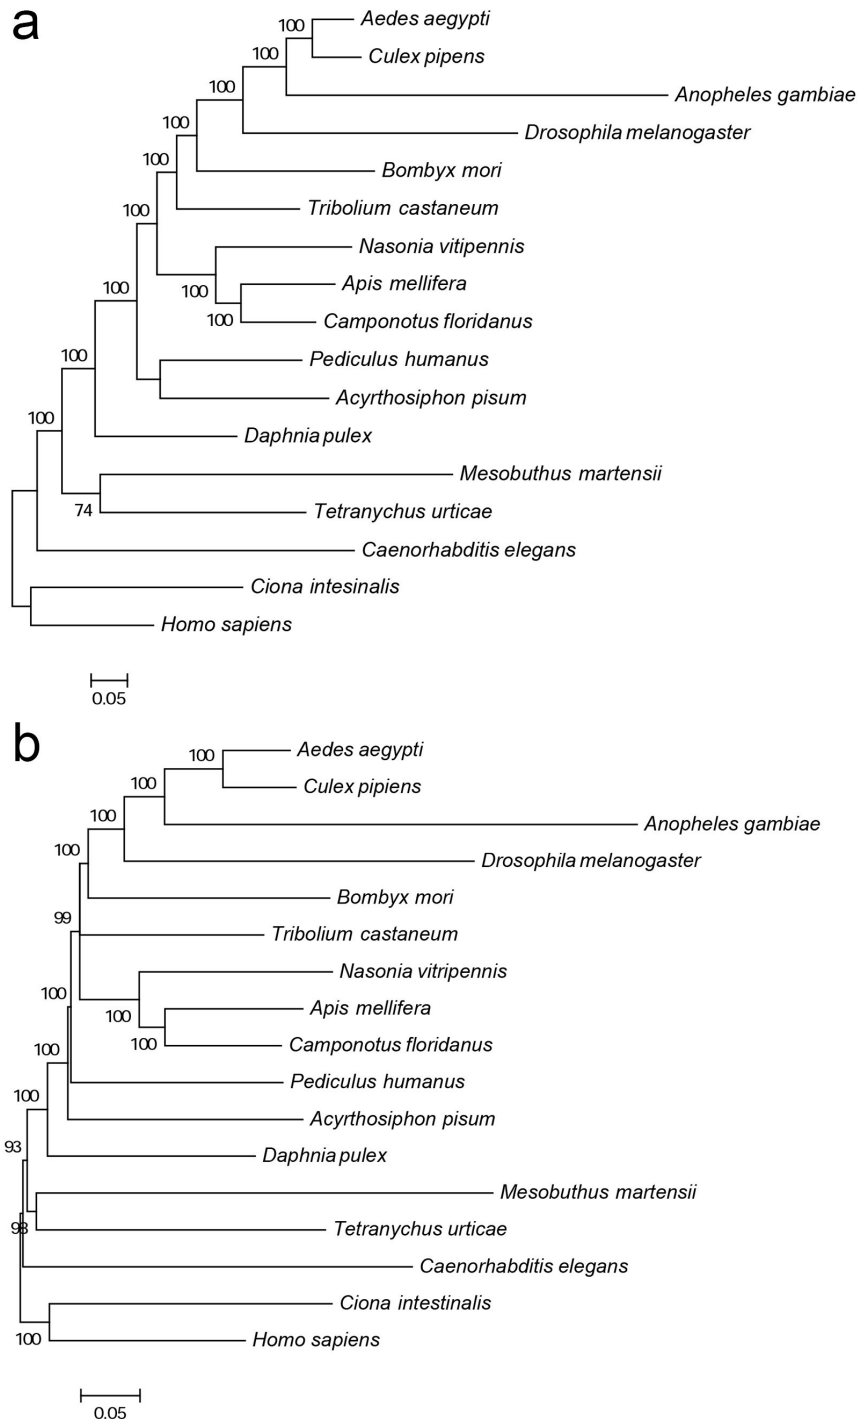

**Supplementary Figure S8 Phylogenetic tree of eukaryotic core gene families.**

Among all core gene families from eukaryotes, 220 proteins have well-acceptable aligned sequences in the 17 genomes considered. The phylogenetic tree was constructed based on the ML (a) and NJ method (b) in MEGA5<sup>57</sup>. The 500-fold bootstrap testing values (> 70) are shown in the branches. The tree was rooted using *Homo sapiens*, and *Ciona intestinalis* as the most external out-groups.

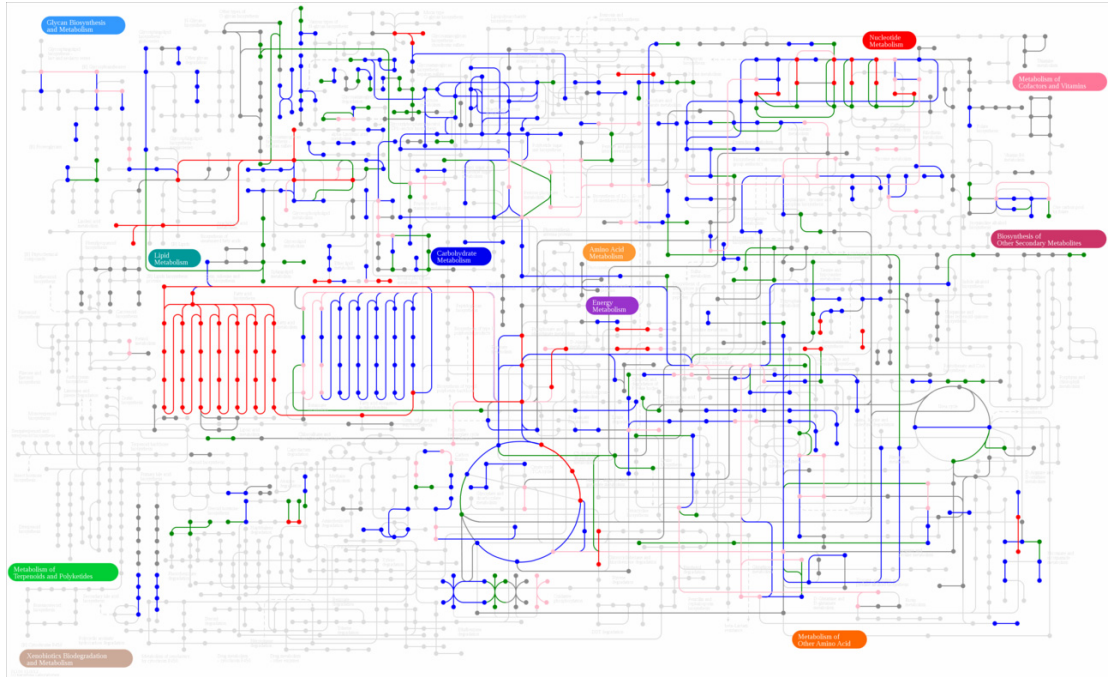

**Supplementary Figure S9 KEGG map of expanded gene families from *M. martensii*.**

The figure was made by KEGG Mapper – Color Pathway tools (<http://www.genome.jp/kegg>). This figure shows the genes involved in the metabolism pathways of *M. martensii*. The grey lines represent the KO gene families with single gene; the green lines represent the KO gene families with two genes; the blue lines represent the KO gene families with 3-5 genes; the pink lines represent the KO gene families with 6-10 gene; and the red lines represent the KO gene families with over 10 genes.

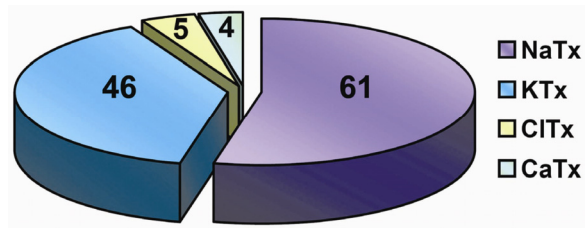

**Supplementary Figure S10 Repertoire of venom neurotoxin genes annotated in the *M. martensii* genome.**

One hundred and sixteen neurotoxin genes are classified into four types, including 61 NaTx genes, 46 KTx genes, 5 ClTx genes, and 4 CaTx genes.

|           |                                                               |     |
|-----------|---------------------------------------------------------------|-----|
| BmKNaTx40 | --MKNLFIILLMIALLEMDTSMFDDGYPVKN--GCRISCIIPSEH-DDLCDQFCCKNKAE  | 55  |
| BmKNaTx23 | --MKNLFIILLMIALLEMDTSMFDDGYPVKN--GCRISCIIPSEH-DDLCDQFCCKNKAE  | 55  |
| BmKNaTx24 | --MKNLFIILLMIALLEMDTSMFDDGYPVKN--GCRISCIIPSEH-DDLCDQFCCKNKAE  | 55  |
| BmKNaTx50 | -----FIVLSLIGVQCK-DGYAFDN-GCPFVCDPFLD-QGVCLTMCQDKCAD          | 45  |
| BmKNaTx48 | -MKEIYFLIVNLIISLFLIEVQCKKNGYPADDD-GCKIAC--FFR-KNGCPFACQKLNLS  | 55  |
| BmKNaTx20 | -----MKNLFLILMMMLSEVYSKR-DGYAVHEGTSCKYKCNVFKK-WEYCTPLCQSKKAR  | 54  |
| BmKNaTx21 | -----MKNLFLILMMMLSEVYSKR-DGYAVHEGTSCKYKCNVFKK-WEYCTPLCQSKKAR  | 54  |
| BmKNaTx37 | -----MKSIVLVLILIIYFVEVNCCKDGYIMIKDTNCKYLCNIFKK-WEYCSPLCQSEGAE | 54  |
| BmKNaTx25 | -----IFLILGTDGSSSTKNGYPTECD-PVTVSCIPLGE-TTQCFSECKKRGS         | 46  |
| BmKNaTx26 | -----FSLLGTDGRNTKDGYPYTCN-LVTVECFPLGE-IYKCFSECKKRGS           | 45  |
| BmKNaTx47 | -----GGKSKHGYLECS-FDTFCFPLGK-SDFCLDICKKIGSN                   | 38  |
| BmKNaTx51 | -----GEAKDGYILECS-FQTFCFPLGK-SDFCIDVKDYGSN                    | 37  |
| BmKNaTx49 | MKKLAIAYFFIIMVSLGSKVVFQGOYPRYVS-DKYVSCSKLGE-NQYCIDICREHTVH    | 58  |
| BmKNaTx38 | -----RNGYPILDD-NCEVLCILIGEINPVCDEACQRVGSS                     | 35  |
| BmKNaTx18 | -----MLFIVNDQVEGDETVDAYPVNTD-GCFYPCYDDE-KPKCNLLCQSLGAS        | 48  |
| BmKNaTx19 | -----DDQVGEAETVDAYPVNNN-GCFYPCMYDD-KPKCNLLCQSLGAS             | 43  |
| BmKNaTx43 | MSIIFLIFAAMLFIIVDDQVEGAELVDAYPLDNN-GCFYPCYHKDD-NQKCSNFCQSLGAS | 58  |
| BmKNaTx22 | MTTIFLIFTALLFIIDDQVEGTERVDAYPVNKN-GCFYPCMYDYN-NQKCSNFCQSLGAS  | 58  |
| BmKNaTx45 | -----LIFTFPLLGVQCKDGYVNEK-YCKVSCWNLGT-NTYCNLLCINNGSS          | 46  |
| BmKNaTx52 | -----DGYLLDKSNDCKVCSAIOQ-----CSELCKANDGK                      | 31  |
| BmKNaTx9  | -MKILTVFMIFIANFLNMQVFSVKRFLIING--SYELGVYAENLGEDGENLCKQKAT     | 57  |
|           | 1.....10.....20.....30.....40.....50.....60                   |     |
| BmKNaTx40 | SGGCDFDA-DACKCWGELDGMEIWEPKSSKCNWNLITKILEN--                  | 99  |
| BmKNaTx23 | SGGCDFDA-DACKCWGELDGMEIWEPKSSKCNWNLITKILEN--                  | 99  |
| BmKNaTx24 | SGGCDFDA-DACKCWGELDGMEIWEPKSSKCNWNLITKILEN--                  | 99  |
| BmKNaTx50 | DGICRKPWNLCYCKGLPDYVPIW-----                                  | 69  |
| BmKNaTx48 | TGSCDIVK-KACKCEGLPDNAKLWDQTKQ-----                            | 83  |
| BmKNaTx20 | TGYCYNFA--CWCIGVPEIKVYGDDEGTVCSWR-----                        | 85  |
| BmKNaTx21 | TGYCYNFA--CWCIGVPEIKVYGDDEGTVCSWR-----                        | 85  |
| BmKNaTx37 | TGYCYNFG--CWCVGLPDGTPVYGDGRICRTR-----                         | 85  |
| BmKNaTx25 | YGICYWFK--CYCKNLPDYVDVYDDIK-----                              | 71  |
| BmKNaTx26 | YGICYFFN--CYCKNLPDHIDRY-----                                  | 66  |
| BmKNaTx47 | YGICKWFR--CYCE-----                                           | 50  |
| BmKNaTx51 | YGICKWFR--CYCE-----                                           | 49  |
| BmKNaTx49 | YGICYLFT--CYCEGLPDTHIYYADLKRIRGGKIDKTKSKKLLKS--               | 100 |
| BmKNaTx38 | YGICYAWT--CYCENVSNDALLLDFGVIRC-----                           | 64  |
| BmKNaTx18 | DGDCYSVT--CKCKLPSVRHELEDPNALSCGTGY-----                       | 82  |
| BmKNaTx19 | FGFCYWFA--CKCEKLPKSVRHELEQPIFISCGTGYLPNSATTKP                 | 87  |
| BmKNaTx43 | TGYCYFFN--CKCDDLSTDVHRDLDFPTFSSCSAGNLEVTTTK--                 | 100 |
| BmKNaTx22 | SGICYAFN--CKCENLPKDVSHKLSIP-IVACGHGYLPEPTTTENP                | 101 |
| BmKNaTx45 | LGICYYFS--CYCEHLPESSYK-VWGEPTPTCGA-----                       | 77  |
| BmKNaTx52 | KGSCRNMG--CYCIGISLTKSKLLNASNRC-----                           | 58  |
| BmKNaTx9  | DGFCRQPH--CFCTDMPDNYATRPTVDPIM-----                           | 86  |
|           | .....70.....80.....90.....100.....                            |     |

### Supplementary Figure S11 Sequences of new NaTx neurotoxins discovered from the *M. martensii* genome.

Twenty-one NaTx neurotoxins (i.e., BmKNaTx9, 18-26, 37, 38, 40, 43, 45, and 47-52) were characterized, and an alignment was performed by ClustalX 1.83. Highly conserved Cys residues are indicated in purple. Color highlighting shows the other conserved amino acid residues. Gaps (-) were introduced to maximize similarities.



```

BmKaKTx6      -----VSFYLCCKCYSLDIFFRPKTTFFCTQS-----ICQESCKRQNKNG      38
BmKaKTx33     MQKLFIVLVLFVLCILGFDDGVYGNIMSFCDRE-----DCQKTCEEINKNG      44
BmKaKTx1      -MKLLFVSLLLFFFTAILVLPSEAQIQTTVRCCTT-VNHCVEPCR-----E      43
BmKaKTx2      -MKFLFLLTLLFFFTAILVVPSEAQIMTEARCHN-KNDCVDPCR-----I      43
BmKaKTx13     ----LYCNLYVYFY--ILVIPSEAQIDINVPCKHGPHECAEPCR----L      40
BmKaKTx10     -MKFIIIVLILISVLIATTPVPSEAQRQCQS-----ITDCQ-----Q      35
BmKaKTx12     -MKFIIIVLILIIIVLIAIIVPVIIEAG--CQS-----VEDCQ-----S      33
BmKaKTx11     -----IVPVSEAQRQCER-----LRDCY-----K      19
BmKaKTx36     -MKISAAVVIIALLICSTMILCESQKISNLHCNN-SGECISHCIR----M      44
BmKaKTx37     -MKISAAVVIIALLICSTMILCESQKISNLHCNN-SGECISHCIR----M      44
BmKaKTx16     ----MKISFLLLLALVICSIGWSETLLTNVCCDA-TIKCWPVCKE----L      41
BmKaKTx30     ----MKISFLLLLALVISSIGWSEAVLTINVSCGA-TSQCWVCKE----L      41
BmKaKTx39     -MSRLSVFILIALVLSVIIDVLNNSKVEG-----ACVENC-----K      36
BmKaKTx41     -MNRLTTIILMLIVINVIMDDISESKVAAG-----IVCKVCK-----I      37
BmKrKTx2      MQKFVLMYSYILLLLILSGIEAAKTSCNHLKRCAK--YGFYRNCT-----E      43
BmKaKTx5      -MNNYKIVLIMVAFFAIFTVTFNSIQVEAQCNK--VGCYEYCW-----42
BmKaKTx25     -MNKLYLVGVLVLFVVLVNVPPIKSVPTGGCPLSDAMCAKHCKS-----N      45
BmKaKTx24     ----CRGVSSLPERNYTLLLEGIKFFHQ-----RTFKICK-----33
1.....10.....20.....30.....40.....50

BmKaKTx6      RCVIEAEG--SLIYHL---CKCY-----56
BmKaKTx33     ICVVETEN--DLFYHV---CRCY-----62
BmKaKTx1      LCLLPHK---CINKK---CTCYPTINACKNDNNN      71
BmKaKTx2      RCSVPKK---CINAK---CICYPSTDDIC-----65
BmKaKTx13     KCLLPSK---CGNGK---CSCYPSIKI-----61
BmKaKTx10     VCLVPLK---CQYGT---CYCKHNGK-----55
BmKaKTx12     YCLVPES---CIYGA---CYCEK-----50
BmKaKTx11     YCMSPKR---CTYGT---CYCEPS-----37
BmKaKTx36     ENTRAAK---CINKK---CYCYP-----61
BmKaKTx37     ENTRAAK---CINKK---CYCYP-----61
BmKaKTx16     FGQSQGK---CVSCK---CRCYS-----58
BmKaKTx30     FGESRGK---CMSNK---CRCY-----57
BmKaKTx39     YCQAKGARNGKCINSN---CHCYY-----57
BmKaKTx41     ICGMQGKKS-----46
BmKrKTx2      CCKQHKKHSGGYCTMYK---CLCKI-----64
BmKaKTx5      -KRLIGH---CFKEN---CKCFNQRK-----61
BmKaKTx25     KFGNTGK---CTGPNKTTCKCSVS-----66
BmKaKTx24     -CLNIHA---IR-----41
.....60.....70.....80.....

```

**Supplementary Figure S12 Sequences of new KTx neurotoxins discovered from the *M. martensii* genome.**

Eighteen KTx neurotoxins (i.e., BmKaKTx1, 2, 5, 6, 10-13, 16, 24, 25, 30, 33, 36, 37, 39, 41, and BmK $\gamma$ KTx2) were, and an alignment was created by ClustalX 1.83. Highly conserved Cys residues are indicated in purple. Color highlighting shows the other conserved amino acid residues. Gaps (-) were introduced to maximize similarities.

|          |                                                    |    |
|----------|----------------------------------------------------|----|
| BmKClTx3 | MKFLYGIVFIALFLTVMFATQTDG-CGPCFTTDANMARKCRECCGGIGKC | 49 |
| BmKClTx4 | MKFLYGIVFIALFLTVMFATQTDG-CGPCFTTDANMARKCRECCGGIGKC | 49 |
| BmKClTx2 | -----TTDANMARKCRECCGGYGKC                          | 20 |
| BmKClTx1 | -----M-CMPCFTTDPNMARKCRDCCGGYGKC                   | 26 |
| BmKClTx5 | MKLIFYFVITYYFLS--IATHSEAMCMPCFTMDHNMAKKCRDCCRGKGC  | 48 |
|          | 1.....10.....20.....30.....40.....50               |    |
| BmKClTx3 | FGPQCLCNRI                                         | 59 |
| BmKClTx4 | FGPQCLCNRI                                         | 59 |
| BmKClTx2 | FGPQCLCNHE                                         | 30 |
| BmKClTx1 | FDPQCLC---                                         | 33 |
| BmKClTx5 | IGPQCL----                                         | 54 |
|          | .....60                                            |    |

**Supplementary Figure S13 Multiple sequence alignments of ClTx neurotoxins characterized from the *M. martensii* genome.**

BmKClTx3 and BmKClTx4 had the same deduced amino acid sequences, corresponding to BmKCT (AF135821) and TXCL1 (AF159976), respectively, previously found in *M. martensii*. Three new ClTx neurotoxin genes (i.e., BmKClTx1, BmKClTx2, and BmKClTx5) were characterized. A multiple sequence alignment was created by ClustalX 1.83. Highly conserved Cys residues are indicated in purple. Color highlighting shows the other conserved amino acid residues. Gaps (-) were introduced to maximize similarities.

|          |                                      |                       |    |
|----------|--------------------------------------|-----------------------|----|
| BmKCaTx1 | MNR-LFILLLLLVVILSHAK-AEDEGYRGS       | CPS-LNKPCDSNRDCCPYGER | 47 |
| BmKCaTx2 | MNR-LFILLLLLVVILSHAK-AEDEGYRGS       | CPS-LNKPCDSNRDCCPYGER | 47 |
| BmKCaTx4 | MNTFVVVFLLLTAILCHAEHALDETARG-        | CNR-LNKKCNSDGDCCRYGER | 48 |
| BmKCaTx3 | MHL-SLLLILFAVTLSNALYIQELLRSDR        | CSKAFGEKCKKDSECCN-GWI | 48 |
|          | 1.....10.....20.....30.....40.....50 |                       |    |
| BmKCaTx1 | CLSSGKGYF---CKEDPGP                  |                       | 63 |
| BmKCaTx2 | CLSSGKGYF---CKEDPGP                  |                       | 63 |
| BmKCaTx4 | CISTGVNYY---CRPDFGP                  |                       | 64 |
| BmKCaTx3 | CAFD--KYYTLRCGYDPGP                  |                       | 65 |
|          | .....60.....                         |                       |    |

**Supplementary Figure S14 Multiple sequence alignments of CaTx neurotoxins characterized from the *M. martensii* genome.**

Three new CaTx neurotoxin genes (i.e., BmKCaTx1, BmKCaTx2, and BmKCaTx3) were characterized; the other CaTx neurotoxin gene, BmKCaTx4, was the same as BmCa1 (DQ206446) previously found in *M. martensii*. A multiple sequence alignment was created by ClustalX 1.83. Highly conserved Cys residues are indicated in purple. Color highlighting shows the other conserved amino acid residues. Gaps (-) were introduced to maximize similarities.

### BmKNaTx18

***M S I I F L V F V A M L F I***  
 ATG TCG ATA ATA TTT CTG GTT TTT GTA GCT ATG CTT TTC ATA  
 GGT AAAAAGTTTTTCATTCTATAAATTTTATCAATACTTTTCATAGGCACTGTATAGAAAAATTAATACTTTAAT  
 GGTATTTAATATACAGAAAAGAAAACATAAATTCACCTAAAATTTTAAATTTTATAACACTCTAAACCTAATT  
 ATTTTCTAGAGAATATAATTGGGGGAAAACGAGAACATTTCAATAAATATTATTATTATTTTCTATTGAAT  
 TGTATTATTGTACTTATTGGATAAATTATATAGAAAATAAATGAAATTTTCTCCTTTTCGAGGATAATGACCTTC  
  
***V N D Q V E G D E T V***  
 GTTATCATTCTTTTCAG TA AAT GAC CAG GTT GAA GGA GAC GAA ACA GTG  
 D A Y P V T N D G C F Y P C T  
 GAT GCT TAT CCT GTG ACT AAT GAT GGC TGT TTC TAT CCA TGT ACG  
 Y D D D K P K C N N L C Q S L  
 TAT GAT GAT GAC AAA CCA AAA TGT AAT AAT TTA TGC CAA TCT TTA  
 G A S D G D C Y S Y T C K C K  
 GGT GCT TCG GAT GGT GAT TGC TAT TCG TAT ACT TGT AAA TGC AAA  
 K L P K S V R H E L E D P N A  
 AAA CTT CCA AAG AGT GTA CGC CAT GAA TTA GAA GAT CCA AAT GCT  
 L S C G T G Y  
 CTT AGT TGT GGT ACT GGA TAC TAG

### BmKNaTx35

***M K L L L L L I I S A S M L I***  
 ATG AAA TTA CTG CTT TTA CTG ATT ATC TCA GCT TCA ATG CTG ATC  
 GGT AAGCATATTTTATCTTGTTTTGTTTACTTTTCGGTAATTTTAACTTAGTAGTCATGGATTTTACTGAATA  
 TTCAAAAAGTTTTCAAGGGCATTGGAAATTGTTTAACTTACTTGATCATCTCTCTAGTACTGAATCT  
 TCACATACCGATTTTCATAACTCGAAAAATATGAAATTTTAAATTTGTTTTCTAAGTTAATATATATCAGAAGGA  
 TTGATAAAATTTGATTGTGATGAAGAAAATATACTTTTTATGCATATTATAATTAATAATTTATTTCATTTTAAAT  
  
***E N L V N A D G Y M K Q S D***  
 TTAG AA AAC TTA GTT AAT GCT GAC GGT TAT ATG AAA CAA CCA GAT  
 G C K V A C L I G N E G C N K  
 GGA TGT AAG GTT GCA TGC CTA ATA GGA AAT GAA GGA TGT AAT AAA  
 Y C K S Y G G Y Y G Y C Y T G  
 TAT TGC AAA TCT TAC GGT GGC TCT TAT GGA TAT TGT TGG ACC TGG  
 G L A C W C E G L P A E K T W  
 GGA CTT GCA TGC TGG TGC GAA GGT CTT CCA GCT GAA AAA ACT TGG  
 K Y E T N T C G G K K  
 AAG TAT GAA ACC AAT ACA TGC GGT GGC AAA AAG TAA

### Supplementary Figure S15 Organization and structure of two representative NaTx neurotoxin genes from the scorpion *M. martensii*.

BmKNaTx18 and BmKNaTx35 were selected to show the organization and structure of the NaTx neurotoxin genes in the *M. martensii* genome. The predicted peptide sequences are shown above the nucleotide sequences. The amino acid residues of the signal peptide are in bold face and italics. Exon nucleotide sequences are indicated with red letters, and intron nucleotide sequences are indicated with black letters. Both 5' and 3' consensus splice sites ("GT" and "AG") are shown in green. BmKNaTx18 and BmKNaTx35 neurotoxin genes in *M. martensii* have one phase-I intron with a GT-AG splicing rule located at the end of the signal peptide coding region. Both BmKNaTx18 and BmKNaTx35 have long intron sequences (>400 bp).

BmKaKTx3

***M S R I F T I I L I V F A F N***  
 ATG AGC CGT ATA TTC ACA ATC ATC TTA ATT GTA TTT GCC TTC AAT  
***I I I***  
 ATA ATT ATT TGT TATAAAAAATAATTATTATTATAAAAACTAAAAATATATATATTTTTTTAATTCAATT  
***S L S*** N F K I D A A A C Y S  
 TAG CT TTA TCT AAT TTC AAA ATC GAT GCA GCT GCT TGC TAC TCC  
 S D C R V K C V A M G F S S G  
 AGT GAT TGC AGA GTT AAA TGT GTA GCT ATG GGA TTC AGT TCA GGA  
 K C I N S K C K C Y K  
 AAA TGT ATA AAT AGT AAA TGT AAA TGC TAT AAA TAA

BmKaKTx33

***M Q K L F I V L V L F C I L G***  
 ATG CAG AAG TTA TTC ATA GTT TTG GTG CTG TTT TGC ATT TTG GGA  
***F D G K***  
 TTC GAT GGT AAG GGT GCTGTTTTTCAAATTAATCCTTCGGAATTATA TCAATAAATAAATGTT  
***V Y G N I M S F***  
 TTTTTTTTTTAATTTCTGATAAGATGGAG TT TAT GGA AAC ATT ATG TCA TTT  
 C D R E D C Q K T C E E I N K  
 TGT GAT CGG GAA GAC TGT CAG AAA ACA TGT GAG GAA ATA AAT AAG  
 N G I C V V E T E N D L F Y H  
 AAC GGA ATA TGC GTG GTT GAA ACT GAA AAT GAT TTA TTC TAT CAT  
 I C R C Y  
 ATC TGT CGA TGT TAT TGA

**Supplementary Figure S16 Organization and structure of two representative KTx neurotoxin genes from the scorpion *M. martensii*.**

BmKaKTx3 and BmKaKTx33 were selected to show the organization and structure of the KTx neurotoxin genes in the *M. martensii* genome. The predicted peptide sequences are shown above the nucleotide sequences. The amino acid residues of the signal peptide are in bold face and italics. Exon nucleotide sequences are indicated with red letters, and intron nucleotide sequences are indicated with black letters. Both 5' and 3' consensus splice sites (“GT” and “AG”) are shown in green. BmKaKTx3 and BmKaKTx33 neurotoxin genes in *M. martensii* have one phase-I intron with a GT-AG splicing rule located at the end of the signal peptide coding region. Both BmKaKTx3 and BmKaKTx33 have short intron sequences (<200 bp).

|        |                                                     |    |
|--------|-----------------------------------------------------|----|
| Dfsin1 | MKTIVLLFVLVLFALLVKMGV EAEHGCPDNEDECHEHCKSIGKSSGGYC  | 50 |
| Dfsin2 | METIVLLFLLALVFCTL-EMGMVEAEHGCPDNEDECHEHCKSIGKSSGGYC | 49 |
| Dfsin3 | MKTIVILFVLALVFCTL-EMGMVEAGFGCPFNQ GKCHRHCRSIRRRGGYC | 49 |
| Dfsin4 | MKTIVLLFVLALVFCTL-EMGIVEAGFGCPFNQ GKCHKHCQSIRRRGGYC | 49 |
| Dfsin5 | MKVIALFFLFAFIFCTL-EVAIVEAGFGCPLNQGACHRHCLSIRRRGGYC  | 49 |
| Dfsin6 | MKVIAILFLLAFVLC TM-EITMVEAGFGCPLFQFACDSHCRGMGRKGGYC | 49 |
|        | 1.....10.....20.....30.....40.....50                |    |
| Dfsin1 | VGPHKQTCRCN--                                       | 61 |
| Dfsin2 | VGPHKQTCRCNP-                                       | 61 |
| Dfsin3 | DGFLKQRCVCYRK                                       | 62 |
| Dfsin4 | DGFLKTRCVCYR-                                       | 61 |
| Dfsin5 | SGFFKQTCYRN                                         | 62 |
| Dfsin6 | GGNFKLTICVVK                                        | 62 |
|        | .....60...                                          |    |

**Supplementary Figure S17 Multiple sequence alignments of new defensins characterized from the *M. martensii* genome.**

Six defensins (BmKDfsin1-6) were characterized. A multiple sequence alignment was created by ClustalX 1.83 software. Highly conserved Cys residues are indicated in purple. Color highlighting shows the other conserved amino acid residues. Gaps (-) were introduced to maximize similarities.

**BmKDfin1**

*M K T I V L L F V L V L V F A*  
 ATG AAA ACC ATT GTA CTT CTC TTC GTA TTG GTA TTA GTT TTT GCA  
*L L V*  
 CTC TTG GTG AGTATCATTCTTGTGCACTTTTAATTGATTTTGTGTATGTAACCAAAAATAATAATT  
 AACACTGATTATAATTTTTTAATTAGACGATGAAGCTAATTATAAAAATATTATTATATTATTAATATTATTAT  
 GTATTCAATATAGAAAATGGGAATGGTAAAAGCTGAACACGGTTGCCTGTCAAACAAAACGAATGTCGCG  
 AAIATTGICAAAGTATTTGGTAAAACCTGGAGGATAITGTGCCGGATTACACAGACAGAAAATGIGITTTGCAAT  
 CATTANTTTGTGTATGTAACCAAAAATAATAATTAACACTGATTATAATTTTTTTAATTAGCCGATGAAGCTA

*K M G M V*  
 ATTATAAAAATATTATTATATTATTATTATTATTATGTATTCAATATAGAAATG  
*E A E H G C P D N E D E C H E*  
 GAA GCT GAA CAC GGT TGT CCT GAC AAC GAA GAC GAA TGT CAC GAA  
*H C K S I G K S G G Y C V G P*  
 CAT TGT AAA AGT ATT GGT AAA AGT GGA GGA TAT TGT GTC GGA CCA  
*H K Q T C R C N*  
 CAC AAA CAG ACT TGT CGT TGC AAT

**BmKDfin2**

*M E T I V L L F L L A L V F C*  
 ATG GAA ACC ATT GTA CTT CTC TTC CTA TTG GCA TTA GTT TTT TGC  
*T L*  
 ACT CTT GGTGAGTATCAITTTCTTGTGCACTTTTGAGTTTGTGTATGTAACCAAAAATAATAATTAACA  
 CTGATTATAATTTTTTTAATTAGCCGATGAAGCTAATTATAAAAATATTATTATATTATTATTATTATTATGATT

*E M G M V E A E H G C P D*  
 CAATATAGAAATG  
*N E D E C H E M C K S I G K S*  
 AAC GAA GAC GAA TGT CAC GAA CAT TGT AAA AGT ATT GGT AAA AGT  
*G G Y C V G P H K Q T C R C N*  
 GGA GGA TAT TGT GTC GGA CCA CAC AAA CAG ACT TGT CGT TGC AAT  
 P  
 CCT TAA

**Supplementary Figure S18 Organization and structure of two representative defensin genes discovered in the scorpion *M. martensii*.**

The predicted peptide sequences are shown above the nucleotide sequences. The amino acid residues of the signal peptide are in bold face and italics. Exon nucleotide sequences are indicated with red letters, and intron nucleotide sequences are indicated with black letters. Both 5' and 3' consensus splice sites (“GT” and “AG”) are shown in green. Two defensins in *M. martensii* had one phase-I intron with a GT-AG splicing rule located at the end of the signal peptide coding region. BmKDfsin1 has longer intron sequences (>400 bp) than BmKDfsin2 (<200 bp).

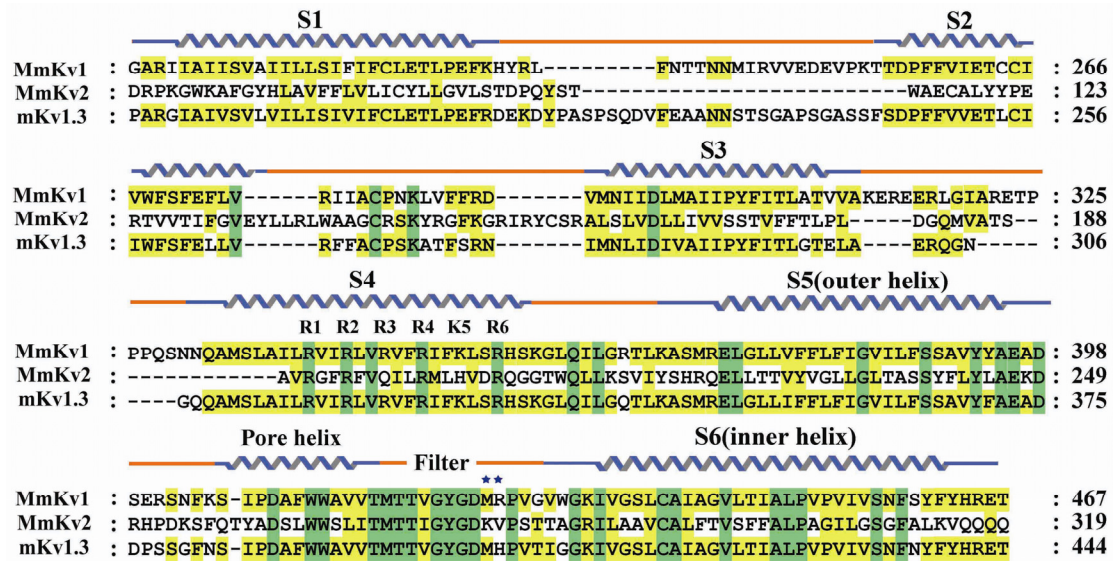

**Supplementary Figure S19 Sequence alignments of scorpion potassium channel and mouse Kv1.3 (GI, 1345815) transmembrane regions.**

Secondary structure elements are indicated above the sequences. The conserved positively charged residues in the voltage sensor of S4 segment are highlighted, and the characteristic residues of ion selectivity filter “TVGYGD” are also indicated.



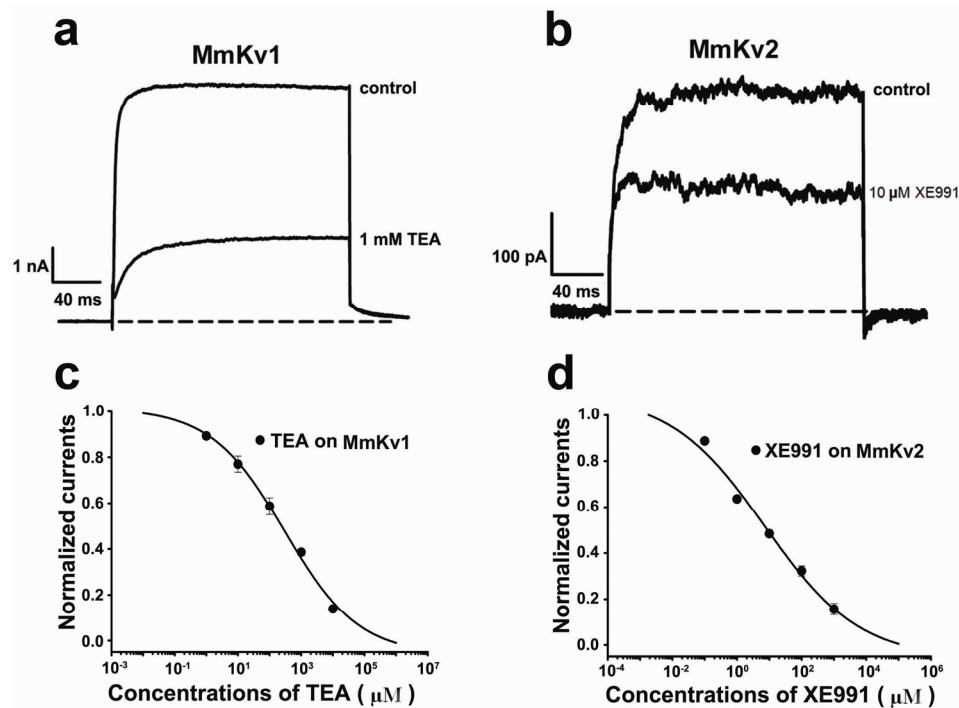

### Supplementary Figure S20 Identification of functional scorpion K<sup>+</sup> channels.

a, Inhibitory activity of TEA to MmKv1 K<sup>+</sup> channel. 1 mM TEA (tetraethylammonium) blocked 59.4% of MmKv1 currents. b, Blocking effect of XE991 to MmKv2 K<sup>+</sup> channel. 10 μM XE991 (10,10-bis(4-pyridinylmethyl)-9(10H)-anthracenone) blocked 51.6% of MmKv2 currents. c, Dose dependence of TEA on the scorpion MmKv1 K<sup>+</sup> channel. The curve was fitted using the Hill equation,  $IC_{50} = 300.8 \pm 91.3 \mu\text{M}$ . d, Dose dependence of XE991 on the scorpion MmKv2 K<sup>+</sup> channel. The curve was fitted using the Hill equation,  $IC_{50} = 7.3 \pm 4.6 \mu\text{M}$ .

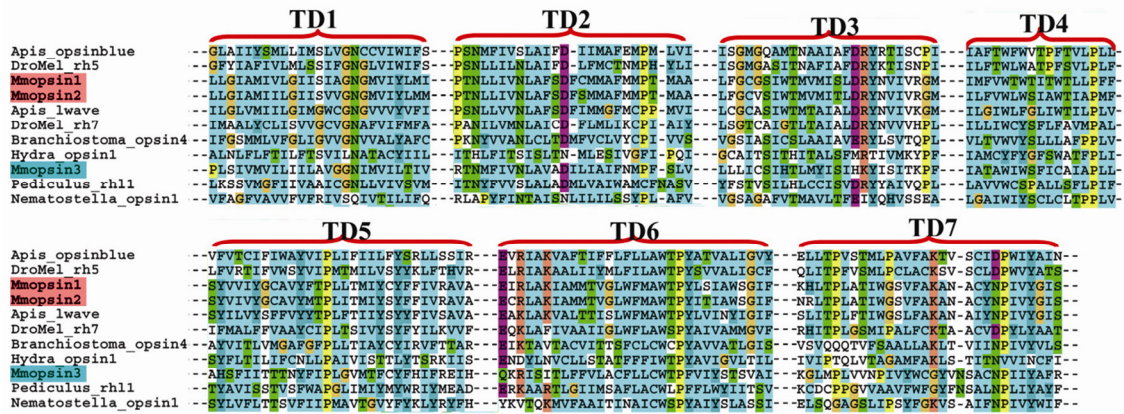

**Supplementary Figure S21 Multiple sequence alignments of opsins' transmembrane regions.**

Seven transmembrane regions (TD1-7) of opsin proteins are highly homologous. The identity and detailed information of each sequence for multiple alignments are listed in Supplementary Tables S17 and S20.

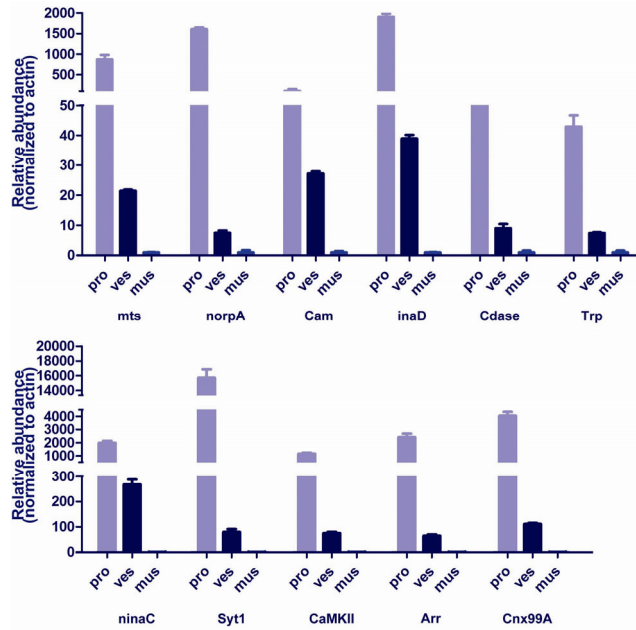

**Supplementary Figure S22 Quantitative expression analysis of phototransduction pathway genes in the tail (vesicle) of the scorpion *M. martensii*.**

pro, prosoma; ves, vesicle or venom gland; mus, muscle from chelas and metasomal segments I-V. These experimental data indicate that 11 phototransduction pathway genes (i.e., mts, norpA, Cam, inaD, Cdase, Trp, ninaC, Syt1, CaMKII, Arr, and Cnx99A) have the same expression patterns among the different tissues of *M. martensii*: prosoma > vesicle > muscle. Data are expressed as the mean  $\pm$  standard deviation from three replicates.

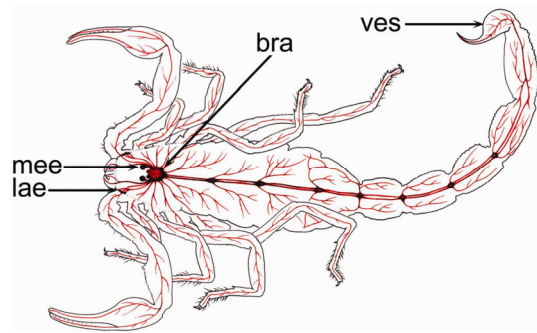

**Supplementary Figure S23 Nervous system of scorpions.**

Nerve fibers are indicated with red lines, while neural ganglion and organ (brain) are highlighted with black. lae, lateral eyes; mee, median eyes; bra, brain; ves, vesicle.

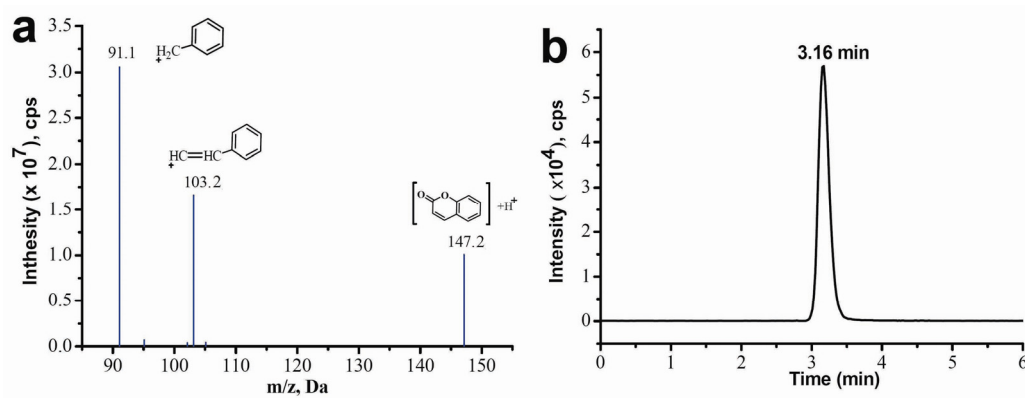

**Supplementary Figure S24 Product ion spectrum and LC-ESI-MS/MS (MRM mode) of coumarin standard.**

a, Product ion spectrum of coumarin standard. b, LC-ESI-MS/MS (MRM mode) chromatogram of coumarin standard. The LC-ESI-MS/MS conditions are described in the experimental section. Coumarin was detected by monitoring  $m/z$  147.2/103.2.

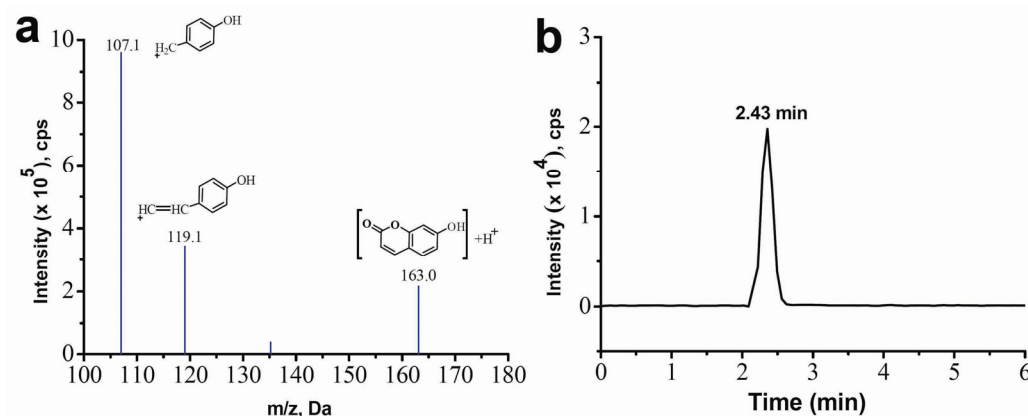

**Supplementary Figure S25 Product ion spectrum and LC-ESI-MS/MS of 7-hydroxy-coumarin standard.**

a, Product ion spectrum of 7-hydroxy-coumarin standard. b, LC-ESI-MS/MS of 7-hydroxy-coumarin standard. The LC-ESI-MS/MS conditions are described in the experimental section. 7-hydroxy-coumarin was detected by monitoring  $m/z$  163.0/107.1.

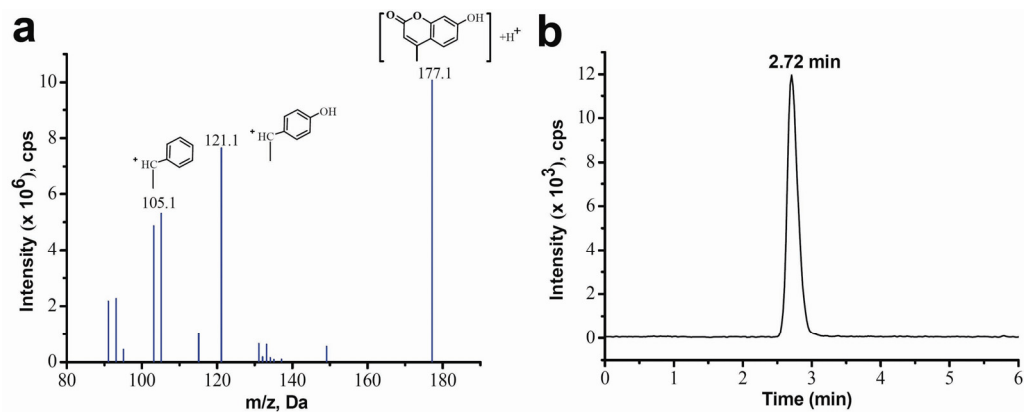

**Supplementary Figure S26 Product ion spectrum and LC-ESI-MS/MS (MRM mode) chromatogram of 4-methyl-7-hydroxy-coumarin standard.**

a, Product ion spectrum of 4-methyl-7-hydroxy-coumarin standard. b, LC-ESI-MS/MS chromatogram of 4-methyl-7-hydroxy-coumarin standard. The LC-ESI-MS/MS conditions are described in the experimental section. 4-methyl-7-hydroxy-coumarin was detected by monitoring  $m/z$  177.1/105.1.

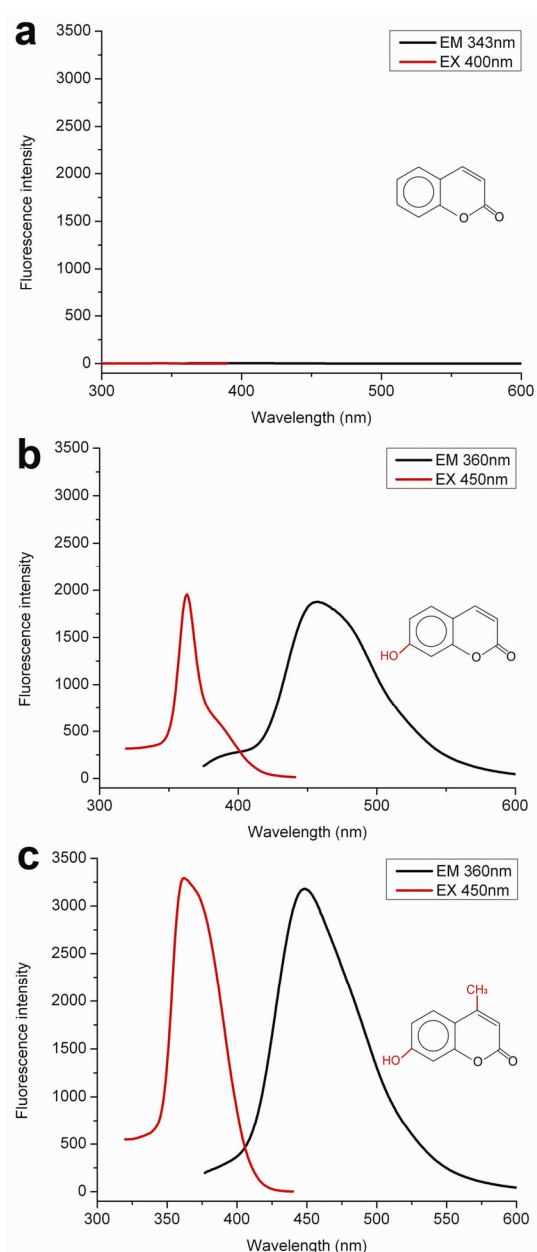

**Supplementary Figure S27 Fluorescence spectra of coumarin and its derivative standards.**

a, Fluorescence spectra of 1 mg/ml coumarin standard resolved in ethanol. b, Fluorescence spectra of 1 mg/ml 7-hydroxy-coumarin standard resolved in ethanol. c, Fluorescence spectra of 1 mg/ml 4-methyl-7-hydroxy-coumarin standard resolved in ethanol. Excitation spectra of coumarin, 7-hydroxy-coumarin, and 4-methyl-7-hydroxy-coumarin were obtained by monitoring the emission of light at 400, 450, and 450 nm, respectively. Emission spectra of coumarin, 7-hydroxy-coumarin, and 4-methyl-7-hydroxy-coumarin were obtained by monitoring emission flowing excitation at 343, 360, and 360 nm, respectively. All fluorescence spectra of coumarin and its derivatives were recorded under the same instrument parameters using the F-4600 FL Spectrophotometer (Hitachi, Japan). The excitation and emission slits were 5 nm and 5 nm, respectively. X-axis shows the light wavelength (nm), and Y-axis represents fluorescence intensity. X- and Y-axes have the same values for all three fluorescence spectra.



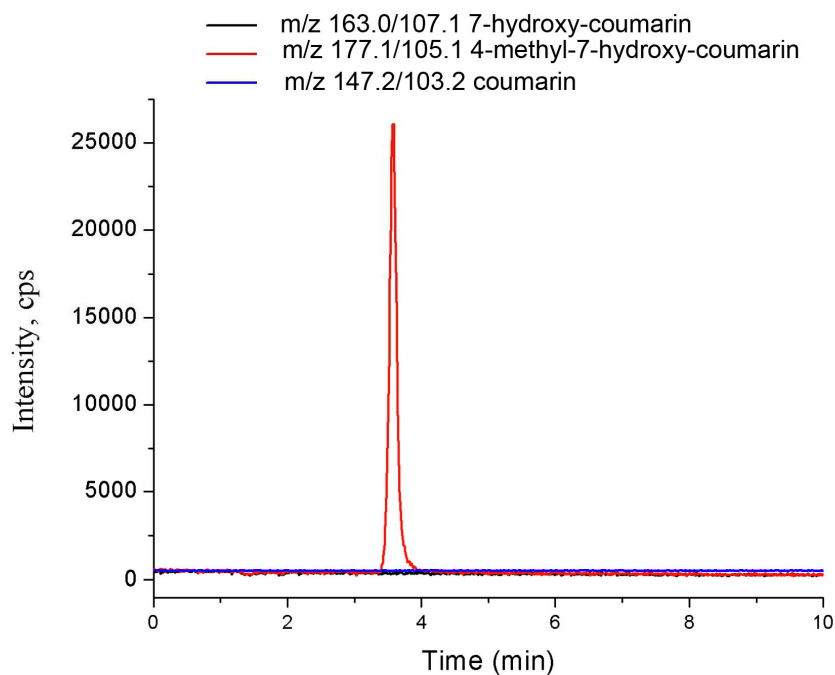

**Supplementary Figure S28** Detection of coumarin, 7-hydroxy-coumarin, and 4-methyl-7-hydroxy-coumarin in the ethanol solution of 4-methyl-7-hydroxy-coumarin standard (stored for more than one year).

The analysis was performed using LC-ESI-MS/MS (MRM mode) by monitoring a transition pair of m/z 147.2/103.2 for coumarin, m/z 163.0/107.1 for 7-hydroxy-coumarin and m/z 177.1/105.1 for 4-methyl-7-hydroxy-coumarin. Only 4-methyl-7-hydroxy-coumarin is observed (red line), and neither 7-hydroxy-coumarin (black line) nor coumarin (blue line) are found in the stored solution of 4-methyl-7-hydroxy-coumarin standard.

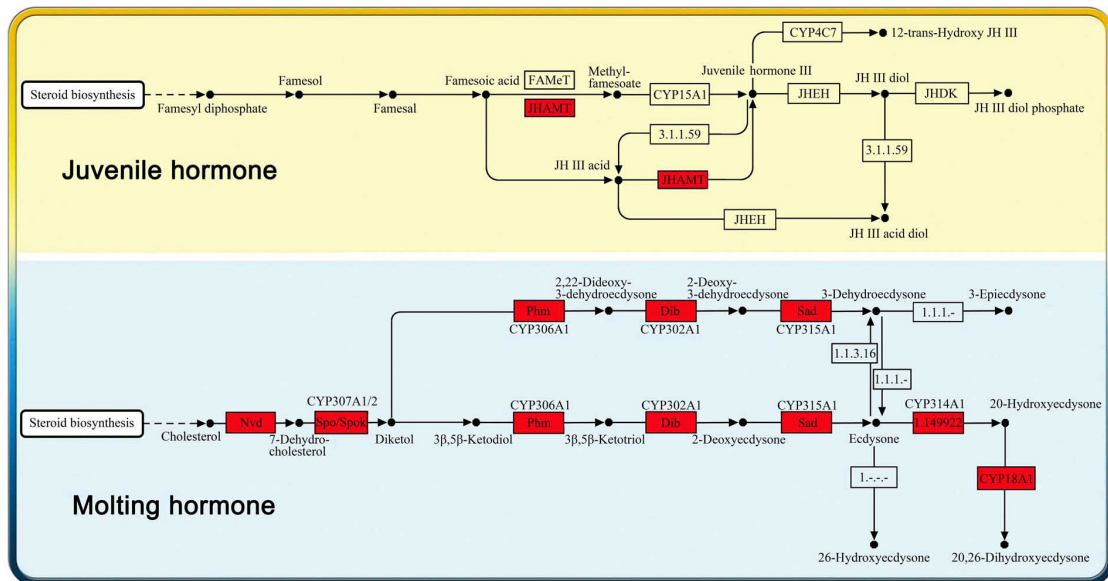

**Supplementary Figure S29 KEGG maps of the biosynthetic pathways for juvenile hormone and molting hormone in the scorpion *M. martensii*.**

Annotations for the KEGG pathways were performed using KAAS from KEGG. The biosynthetic pathway of juvenile hormone involves Jhamt, but not CYP15A1. *M. martensii* has the complete biosynthetic and metabolic pathways for molting hormone: Nvd, CYP307A1/2, CYP306A1, CYP302A1, CYP315A1, CYP314A1, and CYP18A1.

## Supplementary Tables

**Supplementary Table S1 C-value and genome size of *M. martensii* determined by flow cytometry.**

| Samples | C-value (pg) | Average C-value (pg) | Average Genome Size (Mb) |
|---------|--------------|----------------------|--------------------------|
| 1       | 1.4          | 1.35 ± 0.04          | 1323.73 ± 39.12          |
| 2       | 1.36         |                      |                          |
| 3       | 1.33         |                      |                          |
| 4       | 1.37         |                      |                          |
| 5       | 1.37         |                      |                          |
| 6       | 1.39         |                      |                          |
| 7       | 1.35         |                      |                          |
| 8       | 1.28         |                      |                          |
| 9       | 1.37         |                      |                          |
| 10      | 1.28         |                      |                          |
| 11      | 1.37         |                      |                          |

**Supplementary Table S2 Statistics of raw sequence data from different Illumina libraries.**

| Lib Type    | Library size | Read number | Read Length | Total Size |
|-------------|--------------|-------------|-------------|------------|
| Illumina-PE | 180 bp       | 540,074,026 | 100bp x2    | 108 Gb     |
|             | 300 bp       | 857,374,353 | 100bp x2    | 171 Gb     |
|             | 420 bp       | 114,738,294 | 100bp x2    | 23 Gb      |
| Illumina-MP | 5 Kb         | 90,917,717  | 75bp x2     | 14 Gb      |
|             | 10 Kb        | 27,999,437  | 75bp x2     | 4 Gb       |
| 454-FLX     | 700 bp       | 3,691,676   | ~450 bp     | 1.3 Gb     |

**Supplementary Table S3 Statistics of genome assembly v1.0 for *M. martensii*.**

| <b>Scaffold</b> | <b>Scaffold Number</b> | <b>Contigs in Scaffolds</b> | <b>Total Size (bp)</b> | <b>Gaps Percentage (%)</b> |
|-----------------|------------------------|-----------------------------|------------------------|----------------------------|
| >1000 Kb        | 27                     | 1,745                       | 33,171,018             | 3.92%                      |
| 500Kb ~ 1000 Kb | 253                    | 8,519                       | 167,014,543            | 3.62%                      |
| 200Kb ~ 500 Kb  | 1,135                  | 18,811                      | 346,568,078            | 4.07%                      |
| 100Kb ~ 200 Kb  | 1,410                  | 12,257                      | 202,225,120            | 4.64%                      |
| 50Kb ~ 100 Kb   | 1,497                  | 7,697                       | 109,051,448            | 5.49%                      |
| 20Kb ~ 50 Kb    | 1,819                  | 5,775                       | 60,029,970             | 8.04%                      |
| 10Kb ~ 20 Kb    | 1,419                  | 3,201                       | 20,339,418             | 16.48%                     |
| 5Kb ~ 10 Kb     | 1,938                  | 3,491                       | 13,938,965             | 31.24%                     |
| 2Kb ~ 5 Kb      | 1,909                  | 2,578                       | 6,583,288              | 21.52%                     |
| 1Kb ~ 2 Kb      | 3,391                  | 3,669                       | 4,560,614              | 0.66%                      |

**Supplementary Table S4 Sample of simple repeats in the *M. martensii* genome.**

| Contig       | Motif Length | Motif  | Repeats | Start  | End    |
|--------------|--------------|--------|---------|--------|--------|
| NODE_888     | 6            | tttgtt | 2       | 159    | 170    |
| NODE_730     | 5            | atctt  | 2       | 61     | 70     |
| NODE_6843    | 6            | tcaaaa | 2       | 858    | 869    |
| NODE_64      | 5            | caaaa  | 2       | 77     | 86     |
| NODE_521     | 3            | aat    | 4       | 72     | 83     |
| NODE_467     | 5            | tagtt  | 2       | 88     | 97     |
| NODE_3834    | 5            | taaat  | 2       | 75     | 84     |
| NODE_3716    | 5            | ctaata | 2       | 26     | 35     |
| NODE_3650    | 5            | ttcaa  | 2       | 53     | 62     |
| NODE_3514    | 2            | ac     | 5       | 83     | 92     |
| NODE_3370    | 5            | ccatg  | 2       | 5      | 14     |
| NODE_3245    | 6            | ttattt | 2       | 25     | 36     |
| NODE_3152    | 5            | gcctc  | 2       | 1      | 10     |
| NODE_299     | 5            | taact  | 2       | 55     | 64     |
| NODE_2970    | 6            | acaaac | 2       | 84     | 95     |
| NODE_2879    | 5            | ttctg  | 2       | 7      | 16     |
| NODE_270     | 5            | gaaga  | 2       | 66     | 75     |
| NODE_2397    | 6            | taaaaa | 2       | 79     | 90     |
| NODE_2156227 | 6            | gtttta | 2       | 50     | 61     |
| NODE_2154331 | 5            | aatta  | 2       | 2,679  | 2,688  |
| NODE_2152134 | 6            | ccgttt | 2       | 1,572  | 1,583  |
| NODE_2142885 | 5            | taaat  | 2       | 2,253  | 2,262  |
| NODE_2083608 | 3            | att    | 5       | 22,676 | 22,690 |
| NODE_2083608 | 5            | taagg  | 2       | 576    | 585    |
| NODE_1984    | 5            | ttttg  | 2       | 48     | 57     |
| NODE_1634    | 5            | caaaa  | 2       | 51     | 60     |
| NODE_154     | 3            | gag    | 5       | 88     | 102    |
| NODE_134     | 5            | cagtt  | 2       | 428    | 437    |
| NODE_1244    | 2            | ta     | 5       | 34     | 43     |
| NODE_1189    | 6            | gggtct | 2       | 55     | 66     |

The full table of simple repeat sequences in *M. martensii* genome could be found in our website:

<http://www.genoportall.org/mm/simple-repeat-sequence-v1.0.txt.zip>

**Supplementary Table S5 Samples of transposable elements in the *M. martensii* genome.**

| <b>TE</b>  | <b>Gene Number</b> | <b>Size (bp)</b> | <b>Proportion</b> |
|------------|--------------------|------------------|-------------------|
| Gypsy      | 1,908              | 2,906,178        | 9.95%             |
| hAT        | 1,637              | 2,606,179        | 8.92%             |
| Mariner    | 1,408              | 2,553,107        | 8.74%             |
| CR1        | 1,313              | 2,008,692        | 6.88%             |
| Copia      | 854                | 1,319,627        | 4.52%             |
| L1         | 708                | 723,407          | 2.48%             |
| RTE        | 576                | 1,039,713        | 3.56%             |
| SMAR       | 560                | 1,023,636        | 3.50%             |
| ERE2_EH_1p | 473                | 869,314          | 2.98%             |
| P-x        | 457                | 564,393          | 1.93%             |
| BEL-x      | 406                | 410,036          | 1.40%             |
| Poseidon   | 382                | 737,556          | 2.52%             |
| Penelope   | 360                | 663,764          | 2.27%             |
| Helitron   | 321                | 351,348          | 1.20%             |
| LOA        | 243                | 571,859          | 1.96%             |
| Polinton   | 243                | 289,705          | 0.99%             |
| Harbinger  | 236                | 302,213          | 1.03%             |
| Dong       | 218                | 470,859          | 1.61%             |
| LINE       | 205                | 321,823          | 1.10%             |
| Sola       | 200                | 262,000          | 0.90%             |
| MuDr       | 195                | 249,466          | 0.85%             |
| BEL        | 186                | 273,634          | 0.94%             |
| EnSpm      | 178                | 242,024          | 0.83%             |
| TRAS       | 153                | 367,732          | 1.26%             |
| L1HS       | 150                | 20,562           | 0.07%             |
| POLB       | 149                | 168,731          | 0.58%             |
| Piggy      | 147                | 150,022          | 0.51%             |
| Ginger     | 145                | 241,314          | 0.83%             |
| L1PREC2    | 143                | 15,240           | 0.05%             |
| LIN        | 141                | 229,900          | 0.79%             |
| ERV        | 130                | 200,089          | 0.68%             |
| R1         | 130                | 239,830          | 0.82%             |
| Crack      | 125                | 175,560          | 0.60%             |
| Transib    | 119                | 129,447          | 0.44%             |
| Tc1        | 110                | 169,040          | 0.58%             |
| CRMAR      | 99                 | 200,662          | 0.69%             |
| BLACKJACKp | 95                 | 157,559          | 0.54%             |
| Tx         | 93                 | 131,967          | 0.45%             |
| I-x        | 90                 | 144,127          | 0.49%             |
| L1PB2c     | 88                 | 10,856           | 0.04%             |

|             |    |         |       |
|-------------|----|---------|-------|
| L2          | 88 | 131,831 | 0.45% |
| TX1         | 82 | 110,164 | 0.38% |
| I-2         | 75 | 134,677 | 0.46% |
| Chapaev-x   | 74 | 75,288  | 0.26% |
| FAMAR1      | 69 | 134,999 | 0.46% |
| Mari2       | 65 | 117,162 | 0.40% |
| I-3         | 63 | 94,099  | 0.32% |
| Hoana       | 62 | 87,403  | 0.30% |
| PENEL1_Nvi  | 62 | 120,046 | 0.41% |
| Proto       | 61 | 89,898  | 0.31% |
| DIRS        | 59 | 83,607  | 0.29% |
| DESMAR1     | 57 | 87,179  | 0.30% |
| INT         | 55 | 66,781  | 0.23% |
| Kolobok     | 55 | 69,712  | 0.24% |
| BovB        | 53 | 103,362 | 0.35% |
| RT          | 53 | 104,592 | 0.36% |
| Chapaev     | 52 | 64,513  | 0.22% |
| Crack-x     | 51 | 88,073  | 0.30% |
| IS4EU       | 51 | 65,396  | 0.22% |
| Rehavkus    | 50 | 66,299  | 0.23% |
| VENSMAR1    | 47 | 95,342  | 0.33% |
| NAVIMAR     | 46 | 89,592  | 0.31% |
| PY          | 46 | 44,345  | 0.15% |
| ATCOPIA     | 45 | 60,117  | 0.21% |
| L1MB        | 45 | 5,922   | 0.02% |
| Galileo     | 44 | 61,083  | 0.21% |
| SHALINE     | 44 | 68,379  | 0.23% |
| ISL2EU      | 43 | 47,540  | 0.16% |
| Tc3         | 42 | 81,262  | 0.28% |
| transposase | 41 | 77,697  | 0.27% |
| MARIAM      | 36 | 62,608  | 0.21% |
| PERERE      | 36 | 65,751  | 0.23% |
| SHACOP      | 36 | 51,941  | 0.18% |
| Ag          | 35 | 65,331  | 0.22% |
| ATP-x_p     | 34 | 32,261  | 0.11% |
| numbus      | 34 | 37,552  | 0.13% |
| Galluhop    | 33 | 77,921  | 0.27% |
| R2          | 33 | 49,811  | 0.17% |
| Neptune     | 32 | 48,370  | 0.17% |
| Nimb        | 32 | 60,170  | 0.21% |
| Howilli     | 31 | 47,568  | 0.16% |
| PX          | 31 | 32,073  | 0.11% |
| Ingi        | 30 | 57,313  | 0.20% |

|              |    |        |       |
|--------------|----|--------|-------|
| AgaPx        | 29 | 27,719 | 0.09% |
| Kiri         | 29 | 40,957 | 0.14% |
| QUETZAL      | 29 | 42,933 | 0.15% |
| Baggins-x    | 28 | 56,893 | 0.19% |
| L2B          | 28 | 29,007 | 0.10% |
| R4           | 28 | 62,850 | 0.22% |
| I-1          | 27 | 57,495 | 0.20% |
| Ogre         | 27 | 33,599 | 0.12% |
| COP          | 26 | 39,462 | 0.14% |
| AeHerves     | 25 | 28,127 | 0.10% |
| KBOC_DB_1p   | 25 | 31,784 | 0.11% |
| HARB-1_AP_1p | 23 | 25,094 | 0.09% |
| Loner        | 22 | 32,322 | 0.11% |
| Zator        | 22 | 27,692 | 0.09% |
| Jockey       | 21 | 23,947 | 0.08% |
| PRO-1        | 21 | 15,085 | 0.05% |
| Academ       | 19 | 22,188 | 0.08% |
| MacERV       | 19 | 16,324 | 0.06% |
| Ambal        | 18 | 24,104 | 0.08% |
| ATP-x        | 18 | 24,765 | 0.08% |
| I-4          | 18 | 30,188 | 0.10% |
| Perere_Smed  | 18 | 34,827 | 0.12% |
| Vingi        | 18 | 37,248 | 0.13% |
| CAULIV       | 17 | 27,877 | 0.10% |
| LIMC         | 17 | 13,236 | 0.05% |
| Proto2-1     | 17 | 11,478 | 0.04% |
| ATHAT        | 16 | 20,848 | 0.07% |
| CYPSM        | 16 | 26,733 | 0.09% |
| HEL          | 16 | 23,000 | 0.08% |
| AeBuster     | 15 | 25,744 | 0.09% |
| HARB         | 15 | 16,857 | 0.06% |
| Lian-Aa1     | 15 | 27,620 | 0.09% |
| PNL          | 15 | 20,258 | 0.07% |
| REX          | 15 | 20,484 | 0.07% |
| TRE          | 15 | 26,190 | 0.09% |
| AMARI        | 14 | 25,935 | 0.09% |
| Chimpo-I     | 14 | 8,301  | 0.03% |
| GYPS         | 14 | 20,789 | 0.07% |
| HELIBAT1     | 14 | 8,289  | 0.03% |
| ITmD37D      | 14 | 15,566 | 0.05% |
| RETRO        | 14 | 22,077 | 0.08% |
| AVMAR        | 13 | 34,091 | 0.12% |
| Kiritsubo    | 13 | 19,896 | 0.07% |



|               |    |        |       |
|---------------|----|--------|-------|
| Randl         | 13 | 23,299 | 0.08% |
| ATRPA         | 12 | 14,911 | 0.05% |
| I_Ele         | 12 | 16,270 | 0.06% |
| L1B           | 12 | 4,663  | 0.02% |
| HAL1-1_Cja_1p | 11 | 2,639  | 0.01% |
| HELMET        | 11 | 12,837 | 0.04% |
| Kibi          | 11 | 15,748 | 0.05% |
| Myotis_hAT1   | 11 | 16,659 | 0.06% |
| R5            | 11 | 12,938 | 0.04% |
| Waldo         | 11 | 23,739 | 0.08% |

**Supplementary Table S6 Single nucleotide polymorphism in the diploid**

| Dataset       | Data size(fq) | Covered genome loci | Heterozygous loci (80%) | Heterozygous percentage (80%) |
|---------------|---------------|---------------------|-------------------------|-------------------------------|
| Genome Seq L1 | 33G           | 913,483,460         | 3,153,071               | 0.35%                         |
| Genome Seq L2 | 19G           | 675,503,758         | 2,092,611               | 0.31%                         |
| Genome Seq L7 | 21G           | 908,031,513         | 2,843,783               | 0.31%                         |

**Supplementary Table S7 Statistics of gene models of *M. martensii* minimum protein coding genes.**

| Gene Models | Num of Exons Per Model | Average Exon Length Per Model | Total Exon Length Per Model |
|-------------|------------------------|-------------------------------|-----------------------------|
| 32,016      | 3.9                    | 198.12 bp                     | 676.6 bp                    |

**Supplementary Table S8 Summary of potential alternatively spliced genes in *M. martensii*.**

| Alternatively Spliced Transcripts | Gene Number |
|-----------------------------------|-------------|
| 2                                 | 3,737       |
| 3                                 | 1,536       |
| 4                                 | 508         |
| 5                                 | 204         |
| >5                                | 154         |
| Total                             | 6,139       |

**Supplementary Table S9 Species used for comparative genomics analysis in the present study.**

| <i>Tax Name</i>                | Resource                             | Citation or GenBank Number |
|--------------------------------|--------------------------------------|----------------------------|
| <i>Acyrtosiphon pisum</i>      | NCBI                                 | BUILD.1.1                  |
| <i>Aedes aegypti</i>           | Vectorbase                           | AegL1.3, April 2012        |
| <i>Anopheles gambiae</i>       | NCBI                                 | BUILD.2.1                  |
| <i>Apis mellifera</i>          | NCBI                                 | BUILD.4.1                  |
| <i>Bombyx mori</i>             | Silkworm Genome Database             | SilkDB V2.0                |
| <i>Caenorhabditis elegans</i>  | NCBI                                 | BUILD.8.1                  |
| <i>Camponotus floridanus</i>   | Camponotus Floridanus Genome Project | Cflo_3.3                   |
| <i>Ciona intestinalis</i>      | NCBI                                 | update 16 September 2008   |
| <i>Culex pipiens</i>           | BROAD INSTITUTE                      | Jun 21, 2012               |
| <i>Daphnia pulex</i>           | wFleaBase                            | Daphnia pulex Genes 2010   |
| <i>Drosophila melanogaster</i> | FlyBase                              | r5.38                      |
| <i>Homo sapiens</i>            | NCBI                                 | BUILD.37.2                 |
| <i>Nasonia vitripennis</i>     | NCBI                                 | NCBI BUILD.1.1             |
| <i>Pediculus humanus</i>       | Vectorbase                           | PhumU1.2, July 2009        |
| <i>Tetranychus urticae</i>     | Bogas                                | Nov 15 2012                |
| <i>Tribolium castaneum</i>     | NCBI                                 | NCBI BUILD.1.1             |

**Supplementary Table S10 The number of expanded gene family and large gene family.**

| <b>Species</b>                 | <b>Expand Family*</b> | <b>Large Family#</b> | <b>All Gene Families</b> |
|--------------------------------|-----------------------|----------------------|--------------------------|
| <i>Aedes aegypti</i>           | 388                   | 5                    | 6,728                    |
| <i>Drosophila melanogaster</i> | 999                   | 3                    | 6,972                    |
| <i>Tribolium castaneum</i>     | 37                    | 0                    | 5,660                    |
| <i>Camponotus floridanus</i>   | 80                    | 19                   | 6,381                    |
| <i>Acyrtosiphon pisum</i>      | 371                   | 10                   | 6,309                    |
| <i>Daphnia pulex</i>           | 269                   | 78                   | 7,831                    |
| <i>Mesobuthus martensii</i>    | 496                   | 69                   | 5,947                    |
| <i>Tetranychus urticae</i>     | 172                   | 25                   | 5,382                    |
| <i>Caenorhabditis elegans</i>  | 210                   | 56                   | 6,282                    |
| <i>Ciona intestinalis</i>      | 126                   | 7                    | 6,126                    |
| <i>Homo sapiens</i>            | 1421                  | 31                   | 8,225                    |

Expand Family\*: the families with z-score>2

Large Family\*: the families with >20 numbers

(More details in Supplementary Note 3)

**Supplementary Table S11 Ten annotated expanded gene family in the *M. martensii* genome.**

| <b>ID</b> | <b>Gene number</b> | <b>Z score</b> | <b>Function</b>                         | <b>Three Representative Genes</b> |
|-----------|--------------------|----------------|-----------------------------------------|-----------------------------------|
| F8        | 157                | 2.58           | Down syndrome cell adhesion molecule    | MMa20200,MMa46644,MMa30953        |
| F40       | 89                 | 2.72           | Choline dehydrogenase                   | MMa51732,MMa10041,MMa33113        |
| F29       | 87                 | 2.45           | ATP-binding cassette                    | MMa40312,MMa15313,MMa39839        |
| F24       | 71                 | 2.25           | Myosin                                  | MMa55824,MMa39812,MMa00137        |
| F46       | 65                 | 2.30           | Dynein heavy chain                      | MMa26304,MMa27825,MMa43716        |
| F35       | 59                 | 2.26           | MFS transporter, OCT family             | MMa45571,MMa52554,MMa52089        |
| F53       | 59                 | 2.65           | glutamate receptor                      | MMa38974,MMa22238,MMa51194        |
| F44       | 56                 | 2.57           | low density lipoprotein-related protein | MMa51846,MMa42212,MMa41894        |
| F76       | 34                 | 2.64           | 26S proteasome regulatory subunit       | MMa27265,MMa17809,MMa23037        |
| F150      | 28                 | 2.49           | aldehyde dehydrogenase                  | MMa30843,MMa12877,MMa14909        |

**Supplementary Table S12 Neurotoxin genes characterized from the *M. martensii* genome.**

| <b>Name</b> | <b><i>M. martensii</i><br/>genome ID</b> | <b>Homologous<br/>gene (GenBank<br/>ID)</b> | <b>E-values</b> |
|-------------|------------------------------------------|---------------------------------------------|-----------------|
| BmKNaTx1    | MMa13618                                 | O61705.1                                    | 4.00E-37        |
| BmKNaTx2    | MMa13616                                 | O61705.1                                    | 3.00E-36        |
| BmKNaTx3    | MMa13619                                 | P45698.1                                    | 4.00E-37        |
| BmKNaTx4    | MMa17865                                 | AAM49598.1                                  | 2.00E-33        |
| BmKNaTx5    | MMa17864                                 | AAM49598.1                                  | 1.00E-35        |
| BmKNaTx6    | MMa17854                                 | AAM49598.1                                  | 1.00E-36        |
| BmKNaTx7    | MMa17853                                 | Q9UAC8.1                                    | 9.00E-31        |
| BmKNaTx8    | MMa17863                                 | Q9UAC9.1                                    | 3.00E-30        |
| BmKNaTx9    | MMa21232                                 | ABJ09780.1                                  | 1.00E-38        |
| BmKNaTx10   | MMa26033                                 | ADT64283.1                                  | 2.00E-20        |
| BmKNaTx11   | MMa29117                                 | Q9BKJ1.1                                    | 2.00E-35        |
| BmKNaTx12   | MMa29118                                 | Q9BKJ1.1                                    | 1.00E-09        |
| BmKNaTx13   | MMa32665                                 | P01497.2                                    | 8.00E-17        |
| BmKNaTx14   | MMa32664                                 | P01497.2                                    | 8.00E-17        |
| BmKNaTx15   | MMa32661                                 | O77091.1                                    | 8.00E-39        |
| BmKNaTx16   | MMa32660                                 | O77091.1                                    | 8.00E-39        |
| BmKNaTx17   | MMa32663                                 | O61668.1                                    | 2.00E-36        |
| BmKNaTx18   | MMa35303                                 | P0CI57.1                                    | 3.00E-05        |
| BmKNaTx19   | MMa35304                                 | C9X4J9.1                                    | 3.00E-06        |
| BmKNaTx20   | MMa35396                                 | ADK12684.1                                  | 2.00E-25        |
| BmKNaTx21   | MMa35393                                 | ADK12684.1                                  | 2.00E-25        |
| BmKNaTx22   | MMa37864                                 | P68725.1                                    | 2.00E-05        |
| BmKNaTx23   | MMa43956                                 | ABR21048.1                                  | 9.00E-38        |
| BmKNaTx24   | MMa43955                                 | ABR21048.1                                  | 9.00E-38        |
| BmKNaTx25*  | MMa44056                                 | P0CI56.1                                    | 3.00E-07        |
| BmKNaTx26   | MMa44055                                 | P0CI56.1                                    | 8.00E-06        |
| BmKNaTx27   | MMa47002                                 | P0C5I5.1                                    | 2.00E-06        |
| BmKNaTx28*  | MMa46992                                 | P68726.1                                    | 2.00E-12        |
| BmKNaTx29   | MMa53032                                 | P24336.1                                    | 5.00E-16        |
| BmKNaTx30   | MMa53030                                 | Q86M31.1                                    | 5.00E-21        |
| BmKNaTx31   | MMa55372                                 | AAF31295.1                                  | 5.00E-37        |
| BmKNaTx32   | MMa00206                                 | AAM49598.1                                  | 2.00E-18        |
| BmKNaTx33   | MMa00705                                 | ADT82854.1                                  | 3.00E-20        |
| BmKNaTx34   | MMa01249                                 | AAK53809.1                                  | 1.00E-37        |
| BmKNaTx35   | MMa04432                                 | Q26292.1                                    | 7.00E-29        |
| BmKNaTx36   | MMa04555                                 | O77091.1                                    | 5.00E-36        |

|            |          |            |          |
|------------|----------|------------|----------|
| BmKNaTx37  | MMa10609 | P0CI55.1   | 1.00E-21 |
| BmKNaTx38* | MMa35093 | 1PE4       | 9.00E-13 |
| BmKNaTx39  | MMa12629 | Q9GQW3.1   | 4.00E-38 |
| BmKNaTx40  | MMa13212 | ABR21048.1 | 3.00E-41 |
| BmKNaTx41  | MMa19599 | O61668.1   | 1.00E-18 |
| BmKNaTx42  | MMa20191 | P59853.1   | 2.00E-20 |
| BmKNaTx43  | MMa37863 | P0C292.1   | 5.00E-06 |
| BmKNaTx44  | MMa23370 | AAF29465.1 | 5.00E-36 |
| BmKNaTx45* | MMa24896 | ADY17426.1 | 6.00E-08 |
| BmKNaTx46  | MMa34630 | AAK53809.1 | 2.00E-37 |
| BmKNaTx47* | MMa31503 | Q4LCT0.1   | 5.00E-06 |
| BmKNaTx48  | MMa41588 | ADY17426.1 | 7.00E-08 |
| BmKNaTx49  | MMa37070 | Q4LCT0.1   | 5.00E-10 |
| BmKNaTx50  | MMa45084 | P0CI56.1   | 3.00E-06 |
| BmKNaTx51* | MMa44674 | Q4LCT0.1   | 1.00E-05 |
| BmKNaTx52  | MMa47685 | Q1I165.1   | 7.00E-05 |
| BmKNaTx53  | MMa51877 | AAK94769.1 | 2.00E-20 |
| BmKNaTx54  | MMa55680 | P45697.2   | 1.00E-25 |
| BmKNaTx55  | MMa00001 | P59853.1   | 1.00E-12 |
| BmKNaTx56  | MMa02192 | Q9BKJ1.1   | 8.00E-23 |
| BmKNaTx57  | MMa02242 | P59853.1   | 3.00E-14 |
| BmKNaTx58  | MMa02691 | AAF29465.1 | 5.00E-36 |
| BmKNaTx59  | MMa05947 | AAP33620.1 | 2.00E-14 |
| BmKNaTx60  | MMa37863 | Q9Y1U3.2   | 1.00E-10 |
| BmKNaTx61  | MMa14634 | Q9BKJ1.1   | 5.00E-11 |
| BmKaKTx1*  | MMa16285 | ACJ23153.1 | 3.00E-10 |
| BmKaKTx2   | MMa16284 | ACJ23153.1 | 2.00E-07 |
| BmKaKTx3   | MMa21259 | 3E8Y       | 2.00E-09 |
| BmKaKTx4   | MMa21265 | Q9TVX3.1   | 2.00E-23 |
| BmKaKTx5   | MMa21260 | Q9TVX3.1   | 2.00E-05 |
| BmKaKTx6   | MMa21379 | Q8MUB1.1   | 8.00E-15 |
| BmKaKTx7   | MMa21378 | Q8MUB1.1   | 4.00E-12 |
| BmKaKTx8   | MMa26036 | Q5F1N4.1   | 7.00E-30 |
| BmKaKTx9   | MMa35053 | AAV59462.1 | 2.00E-14 |
| BmKaKTx10  | MMa35044 | AAV59462.1 | 2.00E-08 |
| BmKaKTx11  | MMa35054 | AAV59462.1 | 7.00E-08 |
| BmKaKTx12  | MMa35043 | AAV59462.1 | 4.00E-05 |
| BmKaKTx13  | MMa35048 | ACJ23153.1 | 3.00E-16 |
| BmKaKTx14  | MMa43624 | Q9NII6.1   | 1.00E-21 |
| BmKaKTx15  | MMa43622 | Q9NII5.1   | 8.00E-22 |
| BmKaKTx16  | MMa43630 | Q9NII5.1   | 3.00E-13 |

|           |          |            |          |
|-----------|----------|------------|----------|
| BmKaKTx17 | MMa43621 | Q8MQL0.1   | 2.00E-16 |
| BmKaKTx18 | MMa43631 | Q9NII7.1   | 3.00E-22 |
| BmKaKTx19 | MMa01676 | Q9U8D1.1   | 2.00E-21 |
| BmKaKTx20 | MMa57009 | Q8MUB1.1   | 4.00E-13 |
| BmKaKTx21 | MMa00460 | Q9BKB4.1   | 5.00E-15 |
| BmKaKTx22 | MMa04118 | Q9NBG9.1   | 9.00E-18 |
| BmKaKTx23 | MMa05343 | A7KJJ7.1   | 1.00E-15 |
| BmKaKTx24 | MMa06076 | AAC72985.1 | 6.00E-05 |
| BmKaKTx25 | MMa31503 | ABW90713.1 | 8.00E-13 |
| BmKaKTx26 | MMa09960 | Q86BX0.1   | 7.00E-16 |
| BmKaKTx27 | MMa16352 | B5KF99.1   | 2.00E-18 |
| BmKaKTx28 | MMa23444 | Q9BKB4.1   | 1.00E-18 |
| BmKaKTx29 | MMa25600 | AAP33621.1 | 6.00E-21 |
| BmKaKTx30 | MMa26924 | Q9NII5.1   | 3.00E-15 |
| BmKaKTx31 | MMa34377 | AAK61820.1 | 2.00E-18 |
| BmKaKTx32 | MMa34333 | AAM91031.1 | 4.00E-17 |
| BmKaKTx33 | MMa34788 | Q8MUB1.1   | 4.00E-09 |
| BmKaKTx34 | MMa52078 | Q8I0L5.1   | 5.00E-16 |
| BmKaKTx35 | MMa54042 | AAM91031.1 | 1.00E-12 |
| BmKaKTx36 | MMa12594 | ACJ23147.1 | 3.00E-12 |
| BmKaKTx37 | MMa20479 | ACJ23147.1 | 3.00E-12 |
| BmKaKTx38 | MMa29598 | AAC72985.1 | 6.00E-05 |
| BmKaKTx39 | MMa36174 | A7KJJ7.1   | 1.00E-07 |
| BmKaKTx40 | MMa41975 | AAC72985.1 | 2.00E-05 |
| BmKaKTx41 | MMa42180 | Q95P89.1   | 4.00E-08 |
| BmKbKTx1  | MMa43637 | Q9N661.1   | 1.00E-34 |
| BmKbKTx2  | MMa35531 | Q9NJC6.1   | 1.00E-23 |
| BmKrKTx1  | MMa43623 | P59938.1   | 1.00E-21 |
| BmKrKTx2  | MMa54155 | Q86QT3.1   | 7.00E-06 |
| BmKKTx1   | MMa56512 | ABN04116.1 | 3.00E-45 |
| BmKCITx1  | MMa37070 | P15222.2   | 2.00E-10 |
| BmKCITx2  | MMa44674 | Q9BJW4.1   | 7.00E-09 |
| BmKCITx3  | MMa00982 | Q9UAD0.1   | 1.00E-09 |
| BmKCITx4  | MMa06682 | Q9UAD0.1   | 6.00E-09 |
| BmKCITx5  | MMa08179 | ABR21063.1 | 5.00E-11 |
| BmKCaTx1  | MMa15573 | B8XH22.1   | 9.00E-11 |
| BmKCaTx2  | MMa48745 | B8XH22.1   | 1.00E-11 |
| BmKCaTx3  | MMa56389 | B8XH22.1   | 3.00E-05 |
| BmKCaTx4  | MMa18822 | Q8I6X9.2   | 5.00E-15 |

\*These toxin genes were not detected to be expressed in the venom gland using RNA-Seq data from this study.

**Supplementary Table S13 Neurotoxin and defensin gene clusters summarized from the *M. martensii* genome.**

| Serial Number | Scaffold ID  | Toxin Gene |
|---------------|--------------|------------|
| 1             | NODE_5541725 | BmKNaTx1   |
|               |              | BmKNaTx2   |
|               |              | BmKNaTx3   |
| 2             | NODE_5965609 | BmKaKTx1   |
|               |              | BmKaKTx2   |
| 3             | NODE_6184654 | BmKNaTx4   |
|               |              | BmKNaTx5   |
|               |              | BmKNaTx6   |
|               |              | BmKNaTx7   |
|               |              | BmKNaTx8   |
| 4             | NODE_6517216 | BmKNaTx9   |
|               |              | BmKaKTx3   |
|               |              | BmKaKTx4   |
|               |              | BmKaKTx5   |
| 5             | NODE_6524412 | BmKaKTx6   |
|               |              | BmKaKTx7   |
| 6             | NODE_6814096 | BmKNaTx10  |
|               |              | BmKaKTx8   |
| 7             | NODE_6975215 | BmKNaTx11  |
|               |              | BmKNaTx12  |
| 8             | NODE_7134751 | BmKNaTx13  |
|               |              | BmKNaTx14  |
|               |              | BmKNaTx15  |
|               |              | BmKNaTx16  |
|               |              | BmKNaTx17  |
| 9             | NODE_7241642 | BmKaKTx9   |
|               |              | BmKaKTx10  |
|               |              | BmKaKTx11  |
|               |              | BmKaKTx12  |
|               |              | BmKaKTx13  |
| 10            | NODE_7255846 | BmKNaTx18  |
|               |              | BmKNaTx19  |
| 11            | NODE_7263488 | BmKNaTx20  |
|               |              | BmKNaTx21  |
| 12            | NODE_7365295 | BmKNaTx43  |
|               |              | BmKNaTx22  |
| 13            | NODE_7554576 | BmKaKTx14  |
|               |              | BmKaKTx15  |
|               |              | BmKaKTx16  |

|    |              |           |
|----|--------------|-----------|
|    |              | BmKaKTx17 |
|    |              | BmKaKTx18 |
|    |              | BmKbKTx1  |
|    |              | BmKrKTx1  |
| 14 | NODE_7565769 | BmKNaTx23 |
|    |              | BmKNaTx24 |
| 15 | NODE_7568079 | BmKNaTx25 |
|    |              | BmKNaTx26 |
| 16 | NODE_7649271 | BmKNaTx27 |
|    |              | BmKNaTx28 |
| 17 | NODE_7818526 | BmKNaTx29 |
|    |              | BmKNaTx30 |
| 18 | NODE_7421102 | BmKDfsin3 |
|    |              | BmKDfsin4 |
| 19 | NODE_4521545 | BmKDfsin1 |
|    |              | BmKDfsin2 |

**Supplementary Table S14 Six new defensin genes discovered from the *M. martensii* genome.**

| Name      | Gene ID  | Homologous gene (GenBank No.) | E-values |
|-----------|----------|-------------------------------|----------|
| BmKDfsin1 | MMa09283 | P56686.1                      | 6.00E-05 |
| BmKDfsin2 | MMa09284 | P56686.1                      | 6.00E-05 |
| BmKDfsin3 | MMa39356 | P41965.1                      | 9.00E-11 |
| BmKDfsin4 | MMa39352 | P41965.1                      | 9.00E-10 |
| BmKDfsin5 | MMa36626 | P41965.1                      | 3.00E-14 |
| BmKDfsin6 | MMa52629 | P41965.1                      | 2.00E-05 |

**Supplementary Table S15 Death of the cockroach *B. dubia* injected with fresh venom from *M. martensii*.**

| Venom Dose ( $\mu$ l/individual) | Animal Number | Survival Number | Death Number | Death Rate |
|----------------------------------|---------------|-----------------|--------------|------------|
| 1/2                              | 10            | 0               | 10           | 100%       |
| 1/4                              | 10            | 2               | 8            | 80%        |
| 1/8                              | 10            | 4               | 6            | 60%        |
| 1/16                             | 10            | 5               | 5            | 50%        |
| 1/32                             | 10            | 8               | 2            | 20%        |
| 1/64                             | 10            | 9               | 1            | 10%        |
| 1/128                            | 10            | 10              | 0            | 0          |
| 0                                | 10            | 10              | 0            | 0          |



**Supplementary Table S16 Death of the scorpion *M. martensii* injected with its own fresh venom.**

| <b>Venom Dose<br/>(<math>\mu</math>l/individual)</b> | <b>Animal<br/>Number</b> | <b>Survival<br/>Number</b> | <b>Death<br/>Number</b> | <b>Death<br/>Rate</b> |
|------------------------------------------------------|--------------------------|----------------------------|-------------------------|-----------------------|
| 10                                                   | 10                       | 10                         | 0                       | 0                     |
| 5                                                    | 10                       | 10                         | 0                       | 0                     |
| 0                                                    | 10                       | 10                         | 0                       | 0                     |

**Supplementary Table S17 Genes involved in the phototransduction pathway in the *M. martensii* genome.**

| Gene name (Drosophila) | <i>M. martensii</i> genome ID | E-values  | Scores |
|------------------------|-------------------------------|-----------|--------|
| Arr                    | MMa03492                      | 3.00E-81  | 298    |
| Cac                    | MMa39395                      | 4.00E-105 | 380    |
|                        | MMa18173                      | 7.00E-57  | 219    |
|                        | MMa23612                      | 9.00E-44  | 176    |
|                        | MMa42091                      | 2.00E-39  | 161    |
|                        | MMa06161                      | 7.00E-39  | 160    |
|                        | MMa03418                      | 1.00E-30  | 132    |
|                        | MMa17617                      | 4.00E-29  | 127    |
| CaMKII                 | MMa41427                      | 8.00E-32  | 134    |
|                        | MMa41654                      | 6.00E-27  | 118    |
|                        | MMa45215                      | 1.00E-31  | 134    |
|                        | MMa42996                      | 5.00E-25  | 112    |
|                        | MMa01898                      | 3.00E-22  | 102    |
|                        | MMa18645                      | 4.00E-18  | 89     |
|                        | MMa18646                      | 4.00E-12  | 69.3   |
|                        | MMa21302                      | 9.00E-30  | 127    |
| MMa22962               | 3.00E-28                      | 122       |        |
| Cam(CALM)              | MMa28976                      | 1.00E-36  | 148    |
|                        | MMa28325                      | 2.00E-33  | 137    |
|                        | MMa31790                      | 4.00E-53  | 202    |
|                        | MMa31244                      | 3.00E-13  | 70.5   |
|                        | MMa33967                      | 7.00E-31  | 129    |
|                        | MMa36464                      | 7.00E-51  | 195    |
|                        | MMa36827                      | 1.00E-81  | 297    |
|                        | MMa41518                      | 4.00E-23  | 103    |
|                        | MMa44822                      | 4.00E-29  | 123    |
|                        | MMa48681                      | 7.00E-36  | 145    |
|                        | MMa50924                      | 4.00E-23  | 103    |
|                        | MMa49931                      | 7.00E-13  | 69.3   |
|                        | MMa52175                      | 4.00E-54  | 206    |
|                        | MMa52883                      | 1.00E-27  | 118    |
|                        | MMa03550                      | 2.00E-34  | 140    |
|                        | MMa08456                      | 7.00E-61  | 228    |
|                        | MMa09585                      | 1.00E-50  | 194    |
|                        | MMa09473                      | 4.00E-49  | 189    |
| MMa13555               | 4.00E-34                      | 139       |        |

|           |          |           |     |
|-----------|----------|-----------|-----|
|           | MMa15813 | 4.00E-34  | 139 |
|           | MMa23541 | 3.00E-29  | 124 |
|           | MMa23239 | 4.00E-63  | 236 |
| Cnx99A    | MMa12354 | 7.00E-72  | 268 |
|           | MMa11165 | 5.00E-53  | 205 |
|           | MMa47989 | 1.00E-52  | 204 |
| CDase     | MMa34926 | 2.00E-175 | 612 |
| DopR      | MMa39583 | 4.00E-102 | 368 |
|           | MMa11918 | 5.00E-92  | 334 |
|           | MMa34740 | 2.00E-61  | 233 |
|           | MMa08722 | 1.00E-51  | 200 |
|           | MMa08030 | 4.00E-51  | 198 |
|           | MMa30406 | 7.00E-51  | 197 |
|           | MMa25619 | 1.00E-49  | 194 |
|           | MMa00895 | 2.00E-47  | 186 |
|           | MMa22488 | 2.00E-46  | 183 |
|           | MMa11827 | 3.00E-46  | 182 |
|           | MMa41467 | 9.00E-46  | 181 |
|           | MMa34743 | 4.00E-43  | 172 |
|           | MMa17020 | 6.00E-41  | 165 |
|           | MMa18652 | 2.00E-40  | 163 |
| MMa31446  | 7.00E-39 | 158       |     |
| Galpha49B | MMa19058 | 1.00E-86  | 316 |
|           | MMa54844 | 1.00E-82  | 302 |
| InaC      | MMa55320 | 2.00E-153 | 539 |
|           | MMa31916 | 8.00E-96  | 347 |
| InaE      | MMa16629 | 8.00E-56  | 215 |
| Mts       | MMa06470 | 3.00E-122 | 434 |
|           | MMa20540 | 1.00E-80  | 296 |
|           | MMa13913 | 9.00E-71  | 263 |
|           | MMa13914 | 5.00E-67  | 250 |
|           | MMa16565 | 2.00E-66  | 249 |
|           | MMa51972 | 2.00E-63  | 239 |
|           | MMa25229 | 2.00E-53  | 206 |
| ninaC     | MMa16182 | 2.00E-103 | 374 |
| norpA     | MMa54976 | 0         | 679 |
|           | MMa20228 | 3.00E-106 | 382 |
| Rh*       | MMa00264 | 3.00E-109 | 391 |
|           | MMa40170 | 2.00E-105 | 378 |
|           | MMa17758 | 3.00E-23  | 105 |
| Shab      | MMa48920 | 2.00E-87  | 320 |

|      |          |           |     |
|------|----------|-----------|-----|
|      | MMa05372 | 3.00E-86  | 316 |
|      | MMa32844 | 7.00E-70  | 262 |
|      | MMa03794 | 8.00E-70  | 262 |
|      | MMa14698 | 4.00E-67  | 253 |
|      | MMa14694 | 2.00E-66  | 251 |
|      | MMa14695 | 5.00E-66  | 249 |
|      | MMa14697 | 9.00E-64  | 241 |
|      | MMa10705 | 2.00E-63  | 241 |
|      | MMa34046 | 3.00E-62  | 237 |
|      | MMa21085 | 3.00E-61  | 233 |
| Syt1 | MMa29228 | 2.00E-137 | 485 |
| Trp  | MMa29466 | 0         | 788 |
|      | MMa45115 | 7.00E-123 | 438 |
|      | MMa56220 | 7.00E-91  | 332 |
|      | MMa35182 | 7.00E-80  | 295 |
|      | MMa18482 | 4.00E-78  | 290 |
|      | MMa08818 | 3.00E-53  | 207 |
| E    | MMa54427 | 3.00E-80  | 296 |

\*The Rhs annotated from the *M. martensii* genome were Mmopsin1, Mmopsin2 and Mmopsin3, corresponding to the gene ID numbers of MMa00264, MMa40170 and MMa17758, respectively.

**Supplementary Table S18 Phototransduction pathway related-genes expressed in the tail of *M. martensii*.**

| Gene name<br>(Drosophila) | <i>M. martensii</i> tail<br>transcriptome ID | E-values  | Scores |
|---------------------------|----------------------------------------------|-----------|--------|
| Arr1                      | comp133_c0_seq1                              | 2.00E-98  | 355    |
| Arr2                      | comp32991_c0_seq1                            | 2.00E-108 | 389    |
| Cac                       | comp9808_c0_seq2                             | 0         | 866    |
|                           | comp9808_c0_seq1                             | 0         | 866    |
|                           | comp5255_c0_seq3                             | 0         | 721    |
|                           | comp5255_c0_seq7                             | 0         | 721    |
|                           | comp5255_c0_seq4                             | 0         | 721    |
|                           | comp5255_c0_seq8                             | 0         | 720    |
|                           | comp5255_c0_seq5                             | 1.00E-138 | 491    |
|                           | comp5255_c0_seq1                             | 1.00E-138 | 491    |
|                           | comp5255_c0_seq6                             | 3.00E-138 | 490    |
|                           | comp5255_c0_seq2                             | 3.00E-138 | 490    |
| CaMKII                    | comp1793_c0_seq1                             | 0         | 725    |
|                           | comp1793_c0_seq2                             | 0         | 718    |
|                           | comp516_c1_seq9                              | 2.00E-178 | 622    |
|                           | comp516_c1_seq7                              | 2.00E-178 | 622    |
|                           | comp516_c1_seq1                              | 2.00E-178 | 622    |
|                           | comp516_c1_seq15                             | 4.00E-83  | 305    |
|                           | comp516_c1_seq10                             | 4.00E-83  | 305    |
|                           | comp516_c1_seq3                              | 4.00E-83  | 305    |
|                           | comp516_c1_seq17                             | 6.00E-82  | 301    |
|                           | comp516_c1_seq12                             | 6.00E-82  | 301    |
|                           | comp516_c1_seq5                              | 6.00E-82  | 301    |
|                           | comp3230_c0_seq1                             | 3.00E-64  | 242    |
|                           | comp3786_c0_seq2                             | 1.00E-62  | 237    |
|                           | comp3786_c0_seq1                             | 1.00E-62  | 237    |
|                           | comp7128_c0_seq1                             | 2.00E-61  | 233    |
|                           | comp516_c1_seq16                             | 3.00E-57  | 219    |
|                           | comp516_c1_seq16                             | 6.00E-17  | 85.5   |
|                           | comp516_c1_seq11                             | 3.00E-57  | 219    |
|                           | comp516_c1_seq4                              | 3.00E-57  | 219    |
|                           | comp516_c1_seq18                             | 4.00E-57  | 219    |
|                           | comp516_c1_seq13                             | 4.00E-57  | 219    |
|                           | comp516_c1_seq6                              | 4.00E-57  | 219    |
|                           | comp9047_c0_seq1                             | 2.00E-55  | 213    |
|                           | comp2178_c0_seq1                             | 4.00E-54  | 209    |
|                           | comp3464_c0_seq2                             | 5.00E-54  | 208    |
|                           | comp3464_c0_seq1                             | 5.00E-54  | 208    |
|                           | comp7335_c0_seq4                             | 6.00E-52  | 201    |

|                                     |                    |           |     |
|-------------------------------------|--------------------|-----------|-----|
|                                     | comp7335_c0_seq3   | 7.00E-52  | 201 |
|                                     | comp4522_c0_seq2   | 1.00E-51  | 201 |
| Cam(CALM)                           | comp242_c0_seq1    | 2.00E-81  | 297 |
|                                     | comp146_c0_seq1    | 2.00E-59  | 224 |
| CDase                               | comp926_c0_seq1    | 0         | 640 |
| Cnx99A                              | comp357_c0_seq1    | 4.00E-149 | 525 |
|                                     | comp357_c0_seq3    | 2.00E-115 | 412 |
|                                     | comp357_c0_seq2    | 6.00E-89  | 325 |
|                                     | comp357_c0_seq4    | 4.00E-55  | 212 |
| DopR                                | comp5875_c0_seq1   | 8.00E-119 | 423 |
|                                     | comp32630_c0_seq1  | 3.00E-60  | 229 |
|                                     | comp9821_c0_seq1   | 3.00E-52  | 202 |
|                                     | comp16092_c0_seq1  | 4.00E-50  | 195 |
| Galpha49B                           | comp3854_c0_seq1   | 0         | 648 |
|                                     | comp3571_c0_seq1   | 0         | 633 |
|                                     | comp3854_c0_seq2   | 3.00E-176 | 614 |
|                                     | comp6597_c0_seq1   | 4.00E-98  | 354 |
|                                     | comp3277_c0_seq1   | 1.00E-91  | 332 |
|                                     | comp10678_c0_seq1  | 4.00E-85  | 311 |
|                                     | comp13043_c0_seq1  | 2.00E-76  | 282 |
|                                     | comp2252_c0_seq1   | 4.00E-76  | 281 |
|                                     | comp6597_c0_seq2   | 3.00E-72  | 268 |
|                                     | comp2252_c0_seq3   | 7.00E-56  | 214 |
| inactivation no<br>afterpotential C | comp10430_c0_seq5  | 0         | 657 |
|                                     | comp4273_c0_seq1   | 2.00E-169 | 352 |
|                                     | comp10430_c0_seq6  | 5.00E-139 | 491 |
|                                     | comp10430_c0_seq7  | 1.00E-99  | 360 |
|                                     | comp15883_c0_seq1  | 2.00E-91  | 333 |
|                                     | comp4034_c0_seq1   | 4.00E-90  | 328 |
|                                     | comp1885_c0_seq3   | 4.00E-89  | 325 |
|                                     | comp1885_c0_seq2   | 6.00E-88  | 321 |
|                                     | comp1885_c0_seq1   | 1.00E-79  | 294 |
|                                     | comp3156_c0_seq1   | 3.00E-77  | 286 |
| InaD                                | comp15375_c0_seq1  | 3.00E-74  | 276 |
|                                     | comp15375_c0_seq2  | 3.00E-74  | 276 |
|                                     | comp599_c1_seq2    | 1.00E-53  | 207 |
|                                     | comp599_c1_seq1    | 1.00E-53  | 207 |
| InaE                                | comp16066_c0_seq4  | 0         | 749 |
|                                     | comp16066_c0_seq6  | 0         | 739 |
|                                     | comp16066_c0_seq11 | 0         | 737 |
|                                     | comp16066_c0_seq1  | 0         | 737 |
|                                     | comp16066_c0_seq2  | 0         | 728 |
|                                     | comp16066_c0_seq9  | 0         | 726 |

|       |                    |           |     |
|-------|--------------------|-----------|-----|
|       | comp16066_c0_seq7  | 0         | 705 |
|       | comp16066_c0_seq8  | 0         | 696 |
|       | comp16066_c0_seq3  | 0         | 695 |
|       | comp16066_c0_seq12 | 0         | 695 |
|       | comp16066_c0_seq5  | 0         | 686 |
|       | comp16066_c0_seq10 | 0         | 684 |
|       | comp14188_c0_seq1  | 3.00E-79  | 292 |
|       | comp14188_c0_seq2  | 2.00E-76  | 283 |
| Laza  | comp2647_c0_seq1   | 2.00E-32  | 135 |
|       | comp10578_c0_seq1  | 3.00E-28  | 122 |
| Mts   | comp1645_c0_seq1   | 7.00E-179 | 622 |
|       | comp9662_c0_seq1   | 3.00E-143 | 504 |
|       | comp1645_c0_seq2   | 4.00E-141 | 497 |
|       | comp2026_c0_seq1   | 2.00E-101 | 365 |
|       | comp567_c0_seq1    | 3.00E-79  | 291 |
|       | comp16991_c0_seq1  | 2.00E-69  | 259 |
|       | comp1143_c0_seq1   | 5.00E-68  | 254 |
|       | comp4777_c0_seq1   | 1.00E-57  | 219 |
|       | comp4454_c1_seq1   | 2.00E-56  | 215 |
|       | comp12732_c0_seq1  | 2.00E-55  | 213 |
|       | comp8732_c0_seq1   | 5.00E-55  | 211 |
| NinaC | comp8925_c0_seq2   | 2.00E-64  | 244 |
|       | comp8925_c0_seq1   | 2.00E-64  | 244 |
|       | comp4741_c0_seq1   | 2.00E-60  | 231 |
|       | comp4508_c0_seq1   | 1.00E-58  | 225 |
|       | comp13759_c0_seq1  | 2.00E-58  | 224 |
|       | comp5601_c0_seq1   | 8.00E-57  | 219 |
|       | comp1481_c0_seq2   | 3.00E-53  | 207 |
|       | comp7775_c0_seq1   | 4.00E-53  | 206 |
|       | comp7375_c0_seq1   | 7.00E-53  | 205 |
|       | comp9720_c0_seq7   | 2.00E-52  | 204 |
|       | comp9720_c0_seq4   | 2.00E-52  | 204 |
|       | comp9720_c0_seq3   | 2.00E-52  | 204 |
|       | comp9720_c0_seq2   | 2.00E-52  | 204 |
|       | comp9720_c0_seq1   | 2.00E-52  | 204 |
| norpA | comp7707_c0_seq4   | 0         | 696 |
|       | comp7707_c0_seq2   | 0         | 693 |
|       | comp7707_c0_seq6   | 0         | 683 |
|       | comp7707_c0_seq8   | 0         | 682 |
|       | comp7707_c0_seq5   | 0         | 681 |
|       | comp7707_c0_seq7   | 0         | 679 |
|       | comp7707_c0_seq3   | 0         | 352 |
|       | comp7707_c0_seq1   | 0         | 352 |

|                  |                    |           |     |
|------------------|--------------------|-----------|-----|
|                  | comp11183_c0_seq1  | 5.00E-107 | 385 |
|                  | comp6205_c0_seq2   | 1.00E-102 | 371 |
|                  | comp6205_c0_seq1   | 1.00E-102 | 371 |
| Rh               | comp16187_c0_seq1  | 1.00E-23  | 107 |
| Shab             | comp13950_c0_seq1  | 0         | 756 |
|                  | comp13950_c0_seq2  | 0         | 756 |
|                  | comp13950_c0_seq9  | 0         | 755 |
|                  | comp13950_c0_seq8  | 0         | 741 |
|                  | comp8211_c0_seq1   | 1.00E-124 | 444 |
|                  | comp13950_c0_seq4  | 4.00E-123 | 439 |
|                  | comp13950_c0_seq3  | 4.00E-123 | 439 |
|                  | comp13950_c0_seq11 | 5.00E-123 | 438 |
|                  | comp13950_c0_seq10 | 2.00E-118 | 423 |
|                  | comp13260_c0_seq2  | 1.00E-87  | 320 |
|                  | comp13260_c0_seq1  | 1.00E-87  | 320 |
|                  | comp15083_c0_seq2  | 1.00E-70  | 264 |
|                  | comp15083_c0_seq1  | 1.00E-70  | 264 |
|                  | comp8840_c1_seq2   | 2.00E-70  | 263 |
|                  | comp8840_c1_seq1   | 2.00E-70  | 263 |
|                  | comp15083_c0_seq4  | 8.00E-70  | 262 |
|                  | comp15083_c0_seq3  | 8.00E-70  | 262 |
|                  | comp2113_c0_seq4   | 2.00E-61  | 234 |
|                  | comp2113_c0_seq1   | 2.00E-61  | 234 |
|                  | comp2113_c0_seq5   | 2.00E-61  | 234 |
| comp2113_c0_seq2 | 2.00E-61           | 234       |     |
| Syt1             | comp12565_c0_seq1  | 2.00E-137 | 485 |
|                  | comp12565_c0_seq2  | 3.00E-67  | 252 |
|                  | comp16717_c0_seq1  | 8.00E-65  | 244 |
|                  | comp16717_c0_seq2  | 9.00E-65  | 244 |
|                  | comp11967_c0_seq1  | 3.00E-56  | 215 |
| Trpl             | comp18136_c0_seq1  | 4.00E-75  | 279 |



**Supplementary Table S19 Primers used for qPCR to quantitatively detect the expression of phototransduction pathway genes.**

| <b>Genes</b>   | <b>Directions</b> | <b>Sequences</b>             |
|----------------|-------------------|------------------------------|
| ninaC          | Forward           | 5'-AGCAATTTTCCTAAGGCTAC-3'   |
|                | Reverse           | 5'-AAACATTTTGGATATCATCG-3'   |
| Mts            | Forward           | 5'-TTAGTAGATGGTCAGATTT-3'    |
|                | Reverse           | 5'-CACATAGGACCCTCATGA-3'     |
| Syt1           | Forward           | 5'-TTCAACTTTAAGGTACCGTT-3'   |
|                | Reverse           | 5'-CTAGCTTGTTTTCTGTCC-3'     |
| CaMKII-PD      | Forward           | 5'-GCTGGGGCTTATGATTAT-3'     |
|                | Reverse           | 5'-GTGTAGAGGCAACACGCT-3'     |
| CaMKII-PH      | Forward           | 5'-TGGATATGTCAAAGGGA-3'      |
|                | Reverse           | 5'-CCCCTTGAGTTTACGTC-3'      |
| norpA          | Forward           | 5'-ACTTCAAGCTGGTTATCGC-3'    |
|                | Reverse           | 5'-TGCATCCATTAAATCTCCT-3'    |
| Cam(CALM)      | Forward           | 5'-GACTGAAGAACAAATTGCTG-3'   |
|                | Reverse           | 5'-GTCAATGGTTCCATTACCA-3'    |
| InaD           | Forward           | 5'-ATATTTACAAGAAGAACTC-3'    |
|                | Reverse           | 5'-GAGGACCTTTTCTTGTT-3'      |
| Arr            | Forward           | 5'-AAAGCCTCATAAAAGGAATT-3'   |
|                | Reverse           | 5'-ATGATGGTACAACCTTTTATCC-3' |
| Cdase          | Forward           | 5'-CAATGGAACTCTTCACTACT-3'   |
|                | Reverse           | 5'-ATAACACGGTAAGTATCATT-3'   |
| Cnx99A         | Forward           | 5'-ATTTGTGCTCCAATATGAAG-3'   |
|                | Reverse           | 5'-TAGTTTCTGCTCAGTACCAC-3'   |
| Trp            | Forward           | 5'-CATCAGGATGTTTATCTT-3'     |
|                | Reverse           | 5'-GAACCTTTTCTGTTTGTA-3'     |
| Rh             | Forward           | 5'-ATCCTATAGTTTATTGGTGT-3'   |
|                | Reverse           | 5'-ACCTCCTGTACTATGTATTG-3'   |
| $\beta$ -actin | Forward           | 5'-GGTATAGTGACAAATTGGGATG-3' |
|                | Reverse           | 5'-TTGCCTTAGGATTCAGTGGG-3'   |

**Supplementary Table S20 Sequences used for opsin phylogenetic and light-wavelength bias analyses.**

| <b>Species Name</b>               | <b>Gene Name</b>         | <b>Accession Number</b> |
|-----------------------------------|--------------------------|-------------------------|
| <i>Anopheles gambiae</i>          | Anopheles_cil            | XP_312503               |
| <i>Apis mellifera</i>             | Apis_pteropsin           | NP_001035057            |
| <i>Bos Taurus</i>                 | Bos_rhodopsin            | 62460472                |
| <i>Bos Taurus</i>                 | Bos_RGR                  | NP_786969               |
| <i>Carassius auratus</i>          | Carassius_cone           | P32310                  |
| <i>Ciona intestinalis</i>         | Ciona_cil                | BAB68391                |
| <i>Gallus gallus</i>              | Gallus_pineal            | P51475                  |
| <i>Gallus gallus</i>              | Gallus_melanopsin        | NP_001038118            |
| <i>Homo sapiens</i>               | Homo_peropsins           | NP_006574               |
| <i>Macaca mulatta</i>             | Macaca_ensephalopsin     | XP_001094239            |
| <i>Loligo forbesi</i>             | Loligo_rh                | P24603                  |
| <i>Mizuhopecten yessoensis</i>    | Mizuhopecten_rh          | O15973                  |
| <i>Mizuhopecten yessoensis</i>    | Mizuhopecten_Go          | O15974                  |
| <i>Mus musculus</i>               | Mus_neuropsin            | NP_861418               |
| <i>Mus musculus</i>               | Mus_RGR                  | AAC69836                |
| <i>Papilio glaucus</i>            | Papilio_rh               | AAD29445                |
| <i>Petromyzon marinus</i>         | Petromyzon_pineal        | Q98980                  |
| <i>Platynereis dumerilii</i>      | Platynereis_rh           | CAC86665                |
| <i>Platynereis dumerilii</i>      | Platynereis_cil          | AAV63834                |
| <i>Petromyzon marinus</i>         | Petromyzon_P-opsin       | AAC41240                |
| <i>Schistocerca gregaria</i>      | Schistocerca_rh          | Q94741                  |
| <i>Takifugu rubripes</i>          | Takifugu_TMT             | NP_001027778            |
| <i>Uta stansburiana</i>           | Uta_parietopsin          | AAZ79904                |
| <i>Branchiostoma</i>              | Branchiostoma_melanopsin | Q4R114                  |
| <i>Pediculus humanus corporis</i> | Pediculus_rhl1           | XP_002422997            |
|                                   | Pediculus_rhl2           | XP_002426976            |
|                                   | Pediculus_rhl3           | XP_002423973            |
|                                   | Pediculus_rhl4           | XP_002430734            |
| <i>Apis mellifera</i>             | Apis_opsinblue           | NP_001011606            |
|                                   | Apis_opsinuv             | NP_001011605            |
| <i>Siproeta stelenes</i>          | Siproeta_lwave           | gb AAU93396             |
| <i>Mouse</i>                      | Mouse_mwave              | O35599                  |
|                                   | Mouse_swave              | P51491                  |
| <i>Poecilia formosa</i>           | Poecilia_lwave           | AEQ53949                |
| <i>Apis mellifera</i>             | Apis_lwave               | NP_001071293            |
| <i>Hydra vulgaris</i>             | Hydra_opsin1             | BAD67148                |
|                                   | Hydra_opsin2             | BAD67147                |

|                               |                      |              |
|-------------------------------|----------------------|--------------|
|                               | Hydra_opsin3         | BAD67146     |
|                               | Hydra_opsin4         | BAD67145     |
|                               | Hydra_opsin5         | BAD67144     |
|                               | Hydra_opsin6         | BAD67143     |
|                               | Hydra_opsin7         | BAD67142     |
|                               | Hydra_opsin8         | BAD67141     |
| <i>Hydra magnipapillata</i>   | Hydra_opsin9         | XP_002160448 |
|                               | Hydra_opsin10        | XP_002163358 |
|                               | Hydra_opsin11        | XP_002163327 |
|                               | Hydra_opsin12        | XP_002163209 |
|                               | Hydra_opsin13        | XP_002157157 |
| <i>Nematostella vectensis</i> | Nematostella_opsin1  | FAA00408     |
|                               | Nematostella_opsin2  | FAA00400     |
|                               | Nematostella_opsin3  | FAA00395     |
|                               | Nematostella_opsin4  | FAA00413     |
|                               | Nematostella_opsin5  | FAA00411     |
|                               | Nematostella_opsin6  | FAA00412     |
|                               | Nematostella_opsin7  | FAA00410     |
|                               | Nematostella_opsin8  | FAA00409     |
|                               | Nematostella_opsin9  | FAA00407     |
|                               | Nematostella_opsin10 | FAA00406     |
|                               | Nematostella_opsin11 | FAA00405     |
|                               | Nematostella_opsin12 | FAA00403     |
|                               | Nematostella_opsin13 | FAA00402     |
|                               | Nematostella_opsin14 | FAA00404     |
|                               | Nematostella_opsin15 | FAA00401     |
|                               | Nematostella_opsin16 | FAA00399     |
|                               | Nematostella_opsin17 | FAA00398     |
|                               | Nematostella_opsin18 | FAA00396     |
|                               | Nematostella_opsin19 | FAA00394     |
|                               | Nematostella_opsin20 | FAA00397     |
|                               | Nematostella_opsin21 | FAA00393     |
|                               | Nematostella_opsin22 | FAA00392     |
|                               | Nematostella_opsin23 | FAA00391     |
|                               | Nematostella_opsin24 | FAA00390     |
|                               | Nematostella_opsin25 | FAA00389     |
|                               | Nematostella_opsin26 | FAA00388     |
|                               | Nematostella_opsin27 | FAA00387     |
|                               | Nematostella_opsin28 | FAA00386     |
|                               | Nematostella_opsin29 | FAA00385     |
|                               | Nematostella_opsin30 | FAA00384     |
|                               | Nematostella_opsin31 | FAA00383     |

|                                 |                      |          |
|---------------------------------|----------------------|----------|
| <i>Branchiostoma belcheri</i>   | Branchiostoma_opsin1 | BAC76019 |
|                                 | Branchiostoma_opsin2 | BAC76020 |
|                                 | Branchiostoma_opsin3 | BAC76021 |
|                                 | Branchiostoma_opsin4 | BAC76024 |
|                                 | Branchiostoma_opsin5 | BAC76023 |
|                                 | Branchiostoma_opsin6 | BAC76022 |
| <i>Drosophila melanogaster</i>  | DroMel_rh1           | *        |
|                                 | DroMel_rh6           | *        |
|                                 | DroMel_rh2           | *        |
|                                 | DroMel_rh3           | *        |
|                                 | DroMel_rh4           | *        |
|                                 | DroMel_rh5           | *        |
|                                 | DroMel_rh7           | *        |
| <i>Drosophila simulans</i>      | DroSim_rh7           | *        |
| <i>Drosophila sechellia</i>     | DroSec_rh7           | *        |
| <i>Drosophila yakuba</i>        | DroYak_rh7           | *        |
| <i>Drosophila erecta</i>        | DroEre_rh7           | *        |
| <i>Drosophila ananassae</i>     | DroAna_rh7           | *        |
| <i>Drosophila pseudoobscura</i> | DroPse_rh7           | *        |
| <i>Drosophila persimilis</i>    | DroPer_rh7           | *        |
| <i>Drosophila willistoni</i>    | DroWil_rh7           | *        |
| <i>Drosophila virilis</i>       | DroVir_rh7           | *        |
| <i>Drosophila mojavensis</i>    | DroMoj_rh7           | *        |
| <i>Drosophila grimshawi</i>     | DroGri_rh7           | *        |

\* The opsins of *Drosophila melanogaster*, *Drosophila simulans*, *Drosophila sechellia*, *Drosophila yakuba*, *Drosophila erecta*, *Drosophila ananassae*, *Drosophila pseudoobscura*, *Drosophila persimilis*, *Drosophila willistoni*, *Drosophila virilis*, *Drosophila mojavensis*, and *Drosophila grimshawi* are obtained from [http://genomewiki.ucsc.edu/index.php/Main\\_Page](http://genomewiki.ucsc.edu/index.php/Main_Page).

**Supplementary Table S21 CYP genes encoding P450 enzymes annotated from the genome of *M. martensii*.**

| <i>M. martensii</i> gene ID | Annotation |
|-----------------------------|------------|
| <b><i>CYP2</i> clan</b>     |            |
| MMa00296                    | CYP18A1    |
| MMa09921                    | CYP18A1    |
| MMa00297                    | CYP2D      |
| MMa36879                    | CYP2A6     |
| MMa00298                    | CYP2R1     |
| MMa09922                    | CYP2R1     |
| MMa20055                    | CYP2R1     |
| MMa40517                    | CYP2R1     |
| MMa29763                    | CYP306A1   |
| MMa30372                    | CYP306A1   |
| MMa53042                    | CYP306A1   |
| MMa43925                    | CYP307A    |
| <b><i>CYP3</i> clan</b>     |            |
| MMa00594                    | CYP3A      |
| MMa01230                    | CYP3A      |
| MMa01349                    | CYP3A      |
| MMa01701                    | CYP3A      |
| MMa02709                    | CYP3A      |
| MMa02961                    | CYP3A      |
| MMa03581                    | CYP3A      |
| MMa03628                    | CYP3A      |
| MMa03629                    | CYP3A      |
| MMa06752                    | CYP3A      |
| MMa08586                    | CYP3A      |
| MMa08649                    | CYP3A      |
| MMa08689                    | CYP3A      |
| MMa10169                    | CYP3A      |
| MMa13538                    | CYP3A      |
| MMa13956                    | CYP3A      |
| MMa14354                    | CYP3A      |
| MMa14736                    | CYP3A      |
| MMa15771                    | CYP3A      |
| MMa16541                    | CYP3A      |
| MMa19201                    | CYP3A      |
| MMa19203                    | CYP3A      |
| MMa20086                    | CYP3A      |
| MMa21635                    | CYP3A      |

|          |       |
|----------|-------|
| MMa21817 | CYP3A |
| MMa22909 | CYP3A |
| MMa22910 | CYP3A |
| MMa22911 | CYP3A |
| MMa25314 | CYP3A |
| MMa25720 | CYP3A |
| MMa29197 | CYP3A |
| MMa29558 | CYP3A |
| MMa29559 | CYP3A |
| MMa29560 | CYP3A |
| MMa30715 | CYP3A |
| MMa32122 | CYP3A |
| MMa32127 | CYP3A |
| MMa32960 | CYP3A |
| MMa33836 | CYP3A |
| MMa34060 | CYP3A |
| MMa34689 | CYP3A |
| MMa35723 | CYP3A |
| MMa36734 | CYP3A |
| MMa38228 | CYP3A |
| MMa38829 | CYP3A |
| MMa39295 | CYP3A |
| MMa39427 | CYP3A |
| MMa40200 | CYP3A |
| MMa42528 | CYP3A |
| MMa42964 | CYP3A |
| MMa43104 | CYP3A |
| MMa43293 | CYP3A |
| MMa44743 | CYP3A |
| MMa45585 | CYP3A |
| MMa45606 | CYP3A |
| MMa47409 | CYP3A |
| MMa47411 | CYP3A |
| MMa49266 | CYP3A |
| MMa49346 | CYP3A |
| MMa50803 | CYP3A |
| MMa51809 | CYP3A |
| MMa51951 | CYP3A |
| MMa52068 | CYP3A |
| MMa52292 | CYP3A |
| MMa53921 | CYP3A |

|                        |        |
|------------------------|--------|
| MMa54567               | CYP3A  |
| MMa55239               | CYP3A  |
| MMa29389               | CYP5A  |
| MMa52069               | CYP5A  |
| MMa16508               | CYP6   |
| MMa41083               | CYP6   |
| MMa43991               | CYP6   |
| MMa46905               | CYP6   |
| MMa02971               | CYP6G1 |
| MMa22623               | CYP9   |
| MMa29198               | CYP9   |
| <b><i>CYP4clan</i></b> |        |
| MMa29608               | CYP4   |
| MMa29609               | CYP4   |
| MMa37178               | CYP4   |
| MMa47974               | CYP4   |
| MMa47975               | CYP4   |
| MMa56901               | CYP4   |
| MMa56977               | CYP4   |
| MMa51869               | CYP4   |
| MMa56069               | CYP4   |
| MMa01910               | CYP4   |
| MMa02347               | CYP4   |
| MMa03517               | CYP4   |
| MMa10063               | CYP4   |
| MMa15900               | CYP4   |
| MMa19194               | CYP4   |
| MMa23015               | CYP4   |
| MMa25020               | CYP4   |
| MMa04333               | CYP4B  |
| MMa26868               | CYP4V  |
| MMa26869               | CYP4V  |
| MMa30075               | CYP4V  |
| MMa28734               | CYP4V  |
| MMa36428               | CYP4V  |
| MMa37047               | CYP4V  |
| MMa37048               | CYP4V  |
| MMa37179               | CYP4V  |
| MMa38799               | CYP4V  |
| MMa41395               | CYP4V  |
| MMa42755               | CYP4V  |

|                                      |        |
|--------------------------------------|--------|
| MMa42253                             | CYP4V  |
| MMa40786                             | CYP4V  |
| MMa44661                             | CYP4V  |
| MMa44199                             | CYP4V  |
| MMa45665                             | CYP4V  |
| MMa48244                             | CYP4V  |
| MMa51741                             | CYP4V  |
| MMa11223                             | CYP4V  |
| MMa00502                             | CYP4V  |
| MMa56082                             | CYP4V  |
| MMa56611                             | CYP4V  |
| MMa56261                             | CYP4V  |
| MMa56263                             | CYP4V  |
| MMa03089                             | CYP4V  |
| MMa03484                             | CYP4V  |
| MMa06754                             | CYP4V  |
| MMa06371                             | CYP4V  |
| MMa10391                             | CYP4V  |
| MMa15094                             | CYP4V  |
| MMa14283                             | CYP4V  |
| MMa14284                             | CYP4V  |
| MMa14285                             | CYP4V  |
| MMa14287                             | CYP4V  |
| MMa14288                             | CYP4V  |
| MMa14289                             | CYP4V  |
| MMa15899                             | CYP4V  |
| MMa17295                             | CYP4V  |
| MMa21472                             | CYP4V  |
| MMa22660                             | CYP4V  |
| MMa25021                             | CYP4V  |
| MMa17917                             | CYP4V  |
| MMa56739                             | CYP4X  |
| <b><i>mitochondrial CYP clan</i></b> |        |
| MMa38874                             | CYP12  |
| MMa12181                             | CYP12  |
| MMa51548                             | CYP24A |
| MMa54014                             | CYP27A |
| MMa38873                             | DIB    |
| MMa42737                             | DIB    |
| MMa46762                             | DIB    |
| MMa46763                             | DIB    |



|          |               |
|----------|---------------|
| MMa55958 | DIB           |
| MMa25315 | SAD, CYP315A1 |
| MMa21388 | SHD, CYP314A1 |

**Supplementary Table S22 Comparison of CYP gene numbers in insects, crustacean, mite, and scorpion.** CYP gene number of *M. martensii* is derived from this study, and CYP gene numbers of insects, crustacean, and mite are from Grbic et al. (2011).

| Species                        | CYP2<br>Clan | CYP3<br>Clan | CYP4<br>Clan | Mitochondrial<br>CYP Clan | Total |
|--------------------------------|--------------|--------------|--------------|---------------------------|-------|
| <b>Insecta</b>                 |              |              |              |                           |       |
| <i>Drosophila melanogaster</i> | 7            | 36           | 32           | 11                        | 88    |
| <i>Anopheles gambiae</i>       | 10           | 40           | 46           | 9                         | 105   |
| <i>Aedes aegypti</i>           | 12           | 82           | 57           | 9                         | 160   |
| <i>Bombyx mori</i>             | 7            | 30           | 36           | 12                        | 85    |
| <i>Apis mellifera</i>          | 8            | 28           | 4            | 6                         | 46    |
| <i>Nasonia vitripennis</i>     | 7            | 48           | 30           | 7                         | 92    |
| <i>Tribolium castaneum</i>     | 8            | 72           | 45           | 9                         | 134   |
| <i>Acyrtosiphon pisum</i>      | 10           | 23           | 23           | 8                         | 64    |
| <i>Pediculus humanus</i>       | 8            | 11           | 9            | 8                         | 36    |
| <b>Crustacea</b>               |              |              |              |                           |       |
| <i>Daphnia pulex</i>           | 20           | 12           | 37           | 6                         | 75    |
| <b>Acari</b>                   |              |              |              |                           |       |
| <i>Tetranychus urticae</i>     | 48           | 10           | 23           | 5                         | 86    |
| <b>Scorpiones</b>              |              |              |              |                           |       |
| <i>Mesobuthus martensii</i>    | 12           | 76           | 61           | 11                        | 160   |

**Supplementary Table S23 CYP gene clusters summarized from the *M. martensii* genome.**

| Numbers | Scaffold ID  | Strand | Gene ID  | Gene Annotation |
|---------|--------------|--------|----------|-----------------|
| 1       | NODE_1109744 | +      | MMa00296 | CYP18A1         |
|         |              | +      | MMa00297 | CYP2D           |
|         |              | -      | MMa00298 | CYP2R1          |
| 2       | NODE_2308936 | -      | MMa02961 | CYP3A           |
|         |              | -      | MMa02971 | CYP6G1          |
| 3       | NODE_2478777 | -      | MMa03628 | CYP3A           |
|         |              | -      | MMa03629 | CYP3A           |
| 4       | NODE_3760419 | +      | MMa06752 | CYP3A           |
|         |              | +      | MMa06754 | CYP4V           |
| 5       | NODE_4719697 | +      | MMa09921 | CYP18A1         |
|         |              | +      | MMa09922 | CYP2R1          |
| 6       | NODE_568659  | -      | MMa14283 | CYP4V           |
|         |              | -      | MMa14284 | CYP4V           |
|         |              | -      | MMa14285 | CYP4V           |
|         |              | -      | MMa14287 | CYP4V           |
|         |              | -      | MMa14288 | CYP4V           |
|         |              | -      | MMa14289 | CYP4V           |
| 7       | NODE_5919781 | +      | MMa15899 | CYP4V           |
|         |              | +      | MMa15900 | CYP4            |
| 8       | NODE_6306247 | -      | MMa19201 | CYP3A           |
|         |              | -      | MMa19203 | CYP3A           |
| 9       | NODE_6629391 | -      | MMa22909 | CYP3A           |
|         |              | -      | MMa22910 | CYP3A           |
|         |              | -      | MMa22911 | CYP3A           |
| 10      | NODE_6740423 | -      | MMa25020 | CYP4            |
|         |              | -      | MMa25021 | CYP4V           |
| 11      | NODE_6772116 | -      | MMa25314 | CYP3A           |
|         |              | +      | MMa25315 | SAD, CYP315A1   |
| 12      | NODE_6871636 | +      | MMa26868 | CYP4V           |
|         |              | -      | MMa26869 | CYP4V           |
| 13      | NODE_6978841 | -      | MMa29197 | CYP3A           |
|         |              | -      | MMa29198 | CYP9            |
| 14      | NODE_6988257 | -      | MMa29558 | CYP3A           |
|         |              | -      | MMa29559 | CYP3A           |
|         |              | +      | MMa29560 | CYP3A           |
| 15      | NODE_6991193 | -      | MMa29608 | CYP4            |
|         |              | -      | MMa29609 | CYP4            |
| 16      | NODE_7120533 | -      | MMa32122 | CYP3A           |
|         |              | -      | MMa32127 | CYP3A           |
| 17      | NODE_7344930 | +      | MMa37047 | CYP4V           |

|    |              |   |          |               |
|----|--------------|---|----------|---------------|
|    |              | + | MMa37048 | CYP4V         |
| 18 | NODE_7349596 | + | MMa37178 | CYP4          |
|    |              | + | MMa37179 | CYP4V         |
| 19 | NODE_7398863 | - | MMa38873 | DIB           |
|    |              | - | MMa38874 | CYP12         |
| 20 | NODE_7643922 | - | MMa46762 | DIB           |
|    |              | - | MMa46763 | DIB           |
| 21 | NODE_7658622 | + | MMa47409 | CYP3A         |
|    |              | + | MMa47411 | CYP3A         |
| 22 | NODE_7681785 | - | MMa47974 | CYP4          |
|    |              | - | MMa47975 | CYP4          |
| 23 | NODE_7790040 | - | MMa52068 | CYP3A         |
|    |              | - | MMa52069 | TBXAS1, CYP5A |
| 24 | NODE_8036453 | + | MMa56069 | CYP4          |
|    |              | - | MMa56082 | CYP4V         |
| 25 | NODE_8045593 | + | MMa56261 | CYP4V         |
|    |              | + | MMa56263 | CYP4V         |

**Supplementary Table S24 Genes involved in juvenile hormone and molting hormone biosynthesis pathways in *M. martensii*.**

| Gene name ( <i>Drosophila</i> )           | <i>M. martensii</i> gene ID |
|-------------------------------------------|-----------------------------|
| JHAMT                                     | MMa48581                    |
|                                           | MMa07889                    |
|                                           | MMa14956                    |
| Nvd                                       | MMa30051                    |
|                                           | MMa33903                    |
|                                           | MMa33904                    |
|                                           | MMa40424                    |
|                                           | MMa45132                    |
|                                           | MMa54826                    |
|                                           | MMa01559                    |
|                                           | MMa19962                    |
|                                           | MMa22754                    |
| MMa23199                                  |                             |
| spo, spok, CYP307A                        | MMa43925                    |
| CYP306A1<br>(ecdysteroid 25-hydroxylase ) | MMa29763                    |
|                                           | MMa30372                    |
|                                           | MMa53042                    |
| Dib                                       | MMa38873                    |
|                                           | MMa42737                    |
|                                           | MMa46762                    |
|                                           | MMa46763                    |
|                                           | MMa55958                    |
| SAD, CYP315A1                             | MMa25315                    |
| ecdysone oxidase                          | MMa36642                    |
| SHD, CYP314A1                             | MMa21388                    |
| CYP18A1                                   | MMa00296                    |
|                                           | MMa09921                    |

## Supplementary Notes

### Supplementary Note 1. Genome assembly, gene features and transcriptome analysis

#### Animals

*M. martensii* individuals were collected from the Fu-niu Mountains, Xichuan County (33.13-33.17°N, 111.48-111.52°E), Henan Province, China. They were observed and manipulated under a Motic K700 stereoscopic microscope. *M. martensii* has the following characteristics: (1) moderate size, with males reaching 53 mm and females 60 mm in total length; (2) general coloration is yellowish to reddish-yellow, with some darker brownish zones on tergites; (3) metasomal segment V with a conspicuous dark spot covering all faces of the segment; (4) carinae and granulations moderately to weakly marked on carapace, tergites, and metasomal segments; (5) pectinal teeth count of 21-26 in males and 17-22 in females; and (6) trichobothrial pattern of orthobothriotaxic type A (beta)<sup>58</sup>. Remarkable sexual dimorphisms allowed the identification of *M. martensii* males easily. First, males have more globular, bigger chela and shorter fingers than those of females. Second, chela fingers on adult males are scalloped, whereas they are nearly straight in females. Third, the mesosome is round in females, whereas it is generally widened and flat in males. Finally, male pectinal teeth and metasomes are bigger than those of females. Moreover, we analyzed the hemispermatozoa of males before extracting nucleic acid. All animal studies were approved by the Institutional Animal Care and Use Committee at Wuhan University.

#### DNA and RNA preparation

Previously, it was reported that the scorpion *M. martensii* had an XY sex chromosome system ([http://www.scdwzz.com.cn/index\\_en.aspx](http://www.scdwzz.com.cn/index_en.aspx))<sup>59</sup>. An adult *M. martensii* male was selected for extraction of DNA samples from muscle tissues of the pedipalp and metasoma (to minimize microbial contamination) for genomic sequencing. The prepared sample was then quickly ground in liquid nitrogen, and DNA extraction was performed using TIANamp Genomic DNA Kit DP304-2 (TIANGEN, China) according to the manufacturer's protocol. The quality and quantity of DNA sample was examined by ultraviolet (UV) absorbance and gel electrophoreses.

We prepared total RNA from a single male scorpion for whole transcriptome sequencing. Briefly, an adult *M. martensii* male was washed three times with 95% ethanol to reduce microbial contamination from its body surface. After ethanol volatilization, the individual was then quickly ground into a fine powder in liquid nitrogen. Total RNA was prepared using the TRIZOL Reagent (Invitrogen, Carlsbad, CA, USA). RNA quantitation was performed by UV absorbance and its quality was further confirmed by gel electrophoreses. Meanwhile, total RNA from the venom

gland of the scorpion *M. martensii* was isolated for transcriptome study. Thirty scorpion individuals (15 males and 15 females) were used for dissection of venom glands (telson). The dissected venom gland tissues were then quickly ground in liquid nitrogen. Subsequently, the preparation and characterization of the total RNA sample were performed as described above.

### **Flow cytometry analysis**

We determined the genome size of *M. martensii* by flow cytometry analysis of fluorescently stained nuclei using chicken erythrocytes as an internal standard<sup>60,61</sup>. The haploid size of *M. martensii* was estimated to be  $1.35 \pm 0.04$  pg, corresponding to  $1,323.73 \pm 39.12$  Mb (Supplementary Table S1). We dissected genital gland tissues of an adult *M. martensii* male individual to prepare a sample for flow cytometry. As shown in Supplementary Fig. S1, the flow cytometry results for *M. martensii* show two peaks. The peak value of the diploid somatic cell DNA is twice the value of sperm cell DNA, which further confirms that the genome size of *M. martensii* determined by flow cytometry is accurate.

### **Genome shotgun sequencing and assembly**

We sequenced the genome of an adult *M. martensii* male using a whole-genome shotgun approach. For sequencing using the Illumina Genome Analyzer or Hiseq2000, paired-end (PE) libraries with insert sizes of 180 bp, 300 bp, and 420 bp were constructed separately, and mate-pair (MP) libraries with circular DNA sizes of 5 Kb and 10 Kb were constructed. The preparation of the paired-end library and sequencing with the Illumina GAIIx/Hiseq2000 sequencing was performed according to standard Illumina protocols (Illumina, San Diego, CA, USA). For the Roche GS-FLX platform, the library was constructed and sequenced using standard protocols (454 Life Sciences, Roche, Branford, CT, USA). Raw sequence data from each library were summarized in Supplementary Table S2. In addition, the genome was sequenced using a Roche 454 GS-FLX instrument with an average read length of 450 bp. The 454 reads were later used in the gap-filling step.

The Illumina data were first processed to filter out low-quality reads. We eliminated the low-quality bases using the PERL script of `fastq_qualitytrim_window.pl` from (<http://genepool.bio.ed.ac.uk/>). The quality threshold and window size were set as 20 and 5, respectively. Data were then screened against microbial, plasmid, and organelle sequences, and removed from the subsequent assembly if found to be contaminants. The remaining sequence reads were assembled using Velvet<sup>33</sup> (version: 1.1.04). The assembling was performed on a computing server, I950R-GP (Dawning Information Industry, Tianjin, China) with eight 2.67-GHz Intel XEONE7-8837 (96 cores) and 1024 G of memory. The operating system is Ubuntu 10.04 LTS. The parameters for Velvet are: `kmer = 49`, `cov_cutoff = 1`, `min_contig_lgth = 100`, `min_pair_count = 2`, `shortMatePaired = yes`, `scaffolding = yes`. The generated scaffolds (with a total size of 1,015.13 Mb) were gap-filled with GapCloser<sup>34</sup> (version: 1.12) using short sequence reads from GAIIx/Hiseq2000 and long reads from Roche 454-FLX. The parameters for GapCloser were: `max_rd_len = 1000`, `avg_ins = 180`, `reverse_seq = 0`, `-k = 25`,

asm\_flags = 3. The resulting genome assembly (v1.0) had a final scaffold N50 length of 223,560 bp and a contig N50 length of 43,135 bp. The largest scaffold had a size of 1.85 Mb. The assembled genome is in good agreement with the experimentally determined genome size, and 95.6% of the genome was composed of a non-gap region (Supplementary Table S3).

The overall GC content in *M. martensii* is 29.6%, which is similar to its close neighbor, *T. urticae*, whose overall GC content is 32.3% (<http://www.ncbi.nlm.nih.gov/genome/?term=Tetranychus+urticae>)<sup>14</sup>. However, they are both lower than other more distant arthropod neighbors, e.g. *D. pulex* (overall GC content 40.8%; genome version: JGI v.1.0, July 5, 2007)<sup>13</sup>, and *D. melanogaster* (overall GC content 42.2%; <http://www.ncbi.nlm.nih.gov/genome/47>). Whether the lower overall GC content represents a phenomenon special to arachnid remains to be further studied.

### **Analysis of microsatellite DNA and transposable elements (TEs)**

We identified simple sequence repeats, low complexity DNA sequences, and satellites from the *M. martensii* genome using SSRIT<sup>35</sup> and RepeatMasker<sup>36</sup> (version 3.2.9). Default parameters were used for screening. The sizes of simple sequence repeats (Supplementary Tables S4) and low complexity sequences were 34,111,238 bp and 32,106,783 bp, respectively (Supplementary Fig. S2).

Since there is no chelicerate-specific TE library, we constructed a putative *M. martensii* specific TE library. Homologs from RepBase16.01<sup>38</sup>, which does not contain chelicerate-specific TEs, were used to query the genome with tblastn (E-value of 1E-5). We used relaxed parameters to collect protein domains associated with TEs. Sequences were extended from TE-domains as far as possible to obtain full-length TEs. As estimated by the collected putative TE sequences, the total size of TEs from *M. martensii* approached 35 Mb. The most abundant TE families were Mariner, hAT, and Gypsy (Supplementary Table S5, <http://www.genportal.org/mm/transposable-element-lib-v1.0.fasta>).

To investigate the percentage of raw sequence data mapped to TEs, we sampled ~40G (400,000,000 x 100bp) reads as queries to blast the library of *M. martensii* specific transposable element sequences we constructed earlier. Any reads having >50 bp region with 90% identity toward a TE element were counted as TE-reads. Out of the sampled raw sequence reads, roughly 13.0% reads were mapped to TE sequences.

### **Single nucleotide polymorphism (SNP) and INDEL in the diploid**

Bowtie2<sup>39</sup>, a BWT-based aligner, was used to align genome sequencing reads to the assembly. Totally 73G filtering fastq files from three different sequence read data sets were used for alignment with at 'local' condition and other parameters being default. Then genotype calling was performed by Samtools pileup with default setting. These sites with sequence depth >4 were accepted in SNP/INDEL calling. A heterozygous genotype for a base would be called if the frequency of the non-consensus allele were between 20% and 80%<sup>40,41</sup>. As displayed in Supplementary Table S6, all three data sets showed a similar level of single nucleotide polymorphism (~3.24 per 1000 bp).

## Gene modeling and annotation

Our gene prediction pipeline is composed of the following steps as displayed in Supplementary Fig. S3. The pipeline was developed based on the published protocol in John K. Colbourne's work<sup>13</sup>.

(1) TEs and other sequence repeats in the assembly were masked before gene modeling. We used homologs from RepBase16.01 to construct a *M. martensii* specific TE database as described below. The masked genome sequence was used in the following gene prediction.

(2) The gene models of *M. martensii* genome were predicted using several methods: AUGUSTUS (version 2.5.5)<sup>42,62</sup>, Fgenesh++<sup>43</sup>, GENEID (version 1.2)<sup>44,63</sup>, SNAP<sup>45</sup>, GlimmerHMM<sup>46</sup> and Gnomon. Since no gene pattern information was available for scorpions, in the first round of gene prediction we constructed a gene prediction training set. Several self-trained gene model prediction methods, such as Fgenesh++ and GENEID, were used to produce gene models respectively. Several training set related gene prediction software, such as AUGUSTUS and GlimmerHMM, were used to predict gene model with parameters from drosophila gene models.

(3) The prediction results from these four softwares were compared, and only identical gene structures from all four prediction results were considered as potential reliable gene models. By manually curating the gene structures from training set with transcriptome sequencing data alignment results (described below), 876 reliable gene structures were recognized as reliable *M. martensii* gene prediction for training set. Using AUGUSTUS retraining program (optimize\_augustus, and etraining model), optimized *M. martensii* specific parameters for gene prediction were obtained.

(4) Next, we used a comprehensive gene prediction pipeline combining ab initio modeling, homology based modeling and EST based modeling. The gene model structures were mainly from the AUGUSTUS prediction results using contrasted training set (from step 3) and transcriptome data as hints file, which is a file with extrinsic evidence about the location and structure of genes, see documentation of AUGUSTUS. Using this training set models, we also retained GlimmerHMM parameters and conducted the second round of gene prediction with GlimmerHMM. And we conducted the prediction with Gnomon and SNAP, using transcriptome data as evidence. These results were compared with AUGUSTUS prediction. Those gene structures have evidence from less than two software were removed.

(5) We also compared the predicted gene with protein homology from public databases (NCBI, Swiss-Prot, Pfam and et al.), as additional but not required evidence. In addition, these gene models were also manually checked. Gene models without clear open reading frame (ORF) were removed.

Eventually, we presented a minimum gene set of *M. martensii* genome. This refers to version 1.0 gene models (<http://www.genportal.org/mm/gene-models-v1.0.gff>), including 32,016 protein coding gene models (>35 AA). They are grouped into 5,947 distinct gene families and 3,211 orphan genes using OrthoMCL (more details in Supplementary Note 2). The script used in gene prediction pipeline will be provided upon request.



Software list:

- (1) AUGUSTUS - <http://augustus.gobics.de/>
- (2) GlimmerHMM - <http://ccb.jhu.edu/software/glimmerhmm/>
- (3) Fgenesh++ - <http://www.molquest.com/help/2.3/programs/Fgenesh++/about.html>
- (4) GENEID - <http://genome.crg.es/software/geneid/index.html>
- (5) Gnomon - <https://www.ncbi.nlm.nih.gov/genome/guide/gnomon.shtml>
- (6) SNAP - <http://korflab.ucdavis.edu/software.html>

For 32,016 protein-coding genes in *M. martensii*, they have a median gene size of approximately 6.7 Kb (open reading frame plus included introns). On average, each gene has 3.9 exons, similar to that of *T. urticae* and *D. melanogaster* (Supplementary Table S7). The average GC content in the genes was 42.7%. The average intron size was approximately 2.12 Kb (Supplementary Fig. S7). Approximately 65% of the introns have lengths less than 2,000 bp.

‘Pseudogenes’ are defined as dysfunctional genes that have evolved to lose their protein-coding ability or to be no longer expressed in the cells due to mutations. The process for estimating pseudogenes in *M. martensii* is: (1) Gene models were collected from gene prediction results. The predicted gene models were translated into protein sequences with 3 possible reading frames with transeq program from EMBOSS package. (2) We identified their homolog sequences from public database: Uni-Prot database with BLAST (E value < 1E-5). These gene models were aligned to their homologues in all 3 different frames. (3) Those genes with two different frames aligned to one single known protein were identified as genes with frameshift. We identified and counted genes with either premature stop codons or indels that cause frameshifts. (4) For the rest genes without known homolog from other species, those belonging to gene clusters were aligned to their homologues within their corresponding clusters. Using similar protocol as described above, genes with premature stop codons or frameshifts were identified. In the *M. martensii* genome, 15,825 gene models are homologous to proteins from other sources, and within them 526 genes were found to have a premature inframe stop codon and 26 ones with frameshifts, which are considered pseudogenes. For the 16,191 genes without homology to known proteins, pseudogenes were estimated as predicted CDS containing premature stop codon, in which 784 were found. And 55 genes were identified to have clear frameshift compared with their paralogs. The combining 1,391 (~4.34%) genes were considered possible pseudogenes in *M. martensii*, which is in line to studies on other arthropods. The pseudogene list was provided in our web site (<http://www.genoport.org/mm/pseudogene-list.txt>).

tRNAs were identified using the program t-RNAscan SE. The RNAmmer program was used to predict rRNAs. These rRNAs, as well as small nuclear and nucleolar RNAs, were included in the tRNA/rRNA gene file (<http://www.genoport.org/mm/noncoding-RNA.xls>).

Gene annotation was performed using a BLAST search against the NCBI nr, Swiss-Prot, and TrEMBL databases using default parameters (setting E value of 1E-5). The CDD and PFAM databases were used for functional domain annotation. Gene

ontology analysis<sup>64</sup> was performed using the annotation results from the NR, Swiss-Prot, and TrEMBL databases (Supplementary Fig. S4). The metabolic pathway was constructed based on the KEGG database using KAAS provided by the KEGG database (Supplementary Fig. S5)<sup>49</sup>.

Of the total number of 32,016 protein-coding genes, nearly 50% were annotated (<http://www.genportal.org/mm/gene-annotation-v1.0.xlsx>). The percentages of the predicted genes annotated to the NCBI nr, Swiss-Prot, TrEMBL, CDD, and PFAM databases were 40.34%, 31.88%, 42.90%, 24.87%, and 37.82%, respectively.

To compare the protein coding genes between *M. martensii* and *T. urticae*, the same annotation pipeline was performed on genes from *T. urticae* genome. In total, 18,961 (59.2%) show similarity to proteins from non-*Mesobuthus* species, while the proportion in *T. urticae* was 60.8%.

### Evidence for predicted gene models

A minimum gene set of 32,016 protein-coding genes (excluding Transposase-like genes) was found in the *M. martensii* genome, which is the most so far among sequenced arthropods. The protein-coding gene models for *M. martensii* was assessed and supported by the following evidence.

To provide experimental support for the gene models and to facilitate gene annotation, we isolated mRNA from mixed tissues and venom glands to be sequenced using Illumina HiSeq2000. Library construction and sequencing were performed according to Illumina's standard protocols. Approximately 27,665,490 and 22,607,723 reads (2 × 100 bp) were obtained from the mixed tissues and venom glands, respectively. We also isolated and sequenced mRNA from mixed whole-body samples using the 454 GS-FLX platform. Sample preparation and sequencing were performed using standard protocols from Roche 454. A total of 1,169,644 reads were generated with an average length 410 bp.

Illumina Solexa reads were mapped to the predicted gene set with Tophat using default parameters. The mapped reads of each gene model were counted from output files (sam format). The expression level of genes is measured using RPKM (<http://www.genportal.org/mm/RNA-expression-RPKM-v1.0.txt>). To investigate the expression of gene model, we filtered out these genes with < 2 reads mapped onto coding region. Out of 32,016 gene models, 29,837 (93.2%) predicted genes were broadly supported by RNA-seq data. The coding regions were supported by at least 2 reads. Junctions between two exons may be covered by RNA-Seq reads, but were not required. When the shared and *Mesobuthus*-specific genes are counted separately, both have the support: 97.4% vs 88.4%. Also, the distributions of gene expression between the two groups show no significant difference (Supplementary Fig. S6). These data strongly indicate that *Mesobuthus*-specific genes are no more “artifact” than those genes shared by the species.

We downloaded the newly published transcriptome data from *C. noxius*<sup>15</sup>, a scorpion species from the different genus of *M. martensii*, and compared them to the predicted gene models of *M. martensii*. The sequencing reads were obtained from SRA database provided from the reference<sup>15</sup>. We aligned the read with predicted gene

models with BLAST program (E value < 1E-5). The regions of gene models covered by more than one reads were summarized. The validated gene models were defined as these genes with >40% of its region covered by *C. noxius* transcriptome sequencing reads. The result indicated that 14,785 (46.2%) gene models were found to have homologs in *C. noxius*. When the shared and *Mesobuthus*-specific genes from *M. martensii* were accounted separately, their rates were ~65% and ~25%, respectively.

To demonstrate the completeness of *M. martensii* assembly and gene modeling, 457 of the 458 (> 99%) core eukaryotic genes CEGMA (Core Eukaryotic Genes Mapping Approach: <http://korflab.ucdavis.edu/datasets/cegma/>)<sup>16</sup> were identified in the gene models for *M. martensii*. 96% of core eukaryotic genes were found in its transcriptome data. The BLAST search program (blastp) was used to align *M. martensii* protein with core eukaryotic genes from CEGMA by setting the cutoff for E-value < 1E-5.

To study the gene duplication events in *M. martensii*, we estimated the synonymous distances (Ks values) among all paralog pairs (more details in Supplementary Note 3). The possibility of erroneous assembly of alleles might result in the artificial gene paralogs. According to Aphid Genomics Consortium<sup>65</sup>, the divergence values for allelic variants are generally very low, thus the cutoff of Ks (<0.01) could be considered to filter out potential allelic variant from true paralogs. The possibility of erroneous assembly of alleles from the same locus as separate genes was estimated to be smaller than 1%.

### **Analysis of putative alternatively spliced genes**

To investigate alternatively spliced genes in *M. martensii*, we used the RNA-seq data to detect potential alternative patterns for the predicted gene models. The raw RNA-seq reads were trimmed from 5' end to 3' end, by setting the window size as 5 bp and mean quality value of each window over 20. Reads containing 'N' were removed. The clean data were mapped onto the *M. martensii* genome (v1.0) using TopHat<sup>66</sup> (version 1.3.1). The mapping was performed with paired-end data, using the predicted gene structures as reference gene models by setting '-G' parameter. Alternatively spliced genes and the transcript products were predicted using Cufflinks<sup>67</sup> (version 2.0.1). The accepted bam file was used by Cufflinks (with default parameters) to detect both known and novel transcript structures. The reported transcript structures (gtf format) were then compared with predicted gene structures using Cuffcompare. As a result, 6,139 gene models from the predicted gene sets were detected to have at least two transcripts of differently spliced form, supported by RNA-seq data (Supplementary Table S8).

## **Supplementary Note 2. Comparative genomics and evolution**

### **Dataset collection and phylogenetic tree construction**

To study the comparative genomics *M. martensii* with *T. urticae*, *D. melanogaster*, *Acyrtosiphon pisum*, *Apis mellifera*, *Bombyx mori*, *Camponotus floridanus*,

*Anopheles gambiae*, *Aedes aegypti*, *Culex pipiens*, *Pediculus humanus*, *Tribolium castaneum*, *Nasonia vitripennis*, *Daphnia pulex*, *Caenorhabditis elegans*, *Ciona intestinalis*, and *Homo sapiens*, we collected the genome dataset by downloading their genomic sequences and predicted gene/protein data from NCBI (<ftp://ftp.ncbi.nih.gov/>) (Supplementary Table S9). Orthologous gene families were identified using OrthoMCL<sup>53</sup> with default parameters, with the  $-I$  parameter set to 3.0, for all proteins of the various species (17 species, including *M. martensii*).

To construct the phylogenetic tree for these 17 species, we collected the eukaryotic core gene set from 17 genomes, and found that out of 457 core genes, 220 were conserved among all the species (<http://www.genoport.org/mm/common-gene-family.txt>). These 220 orthologs present in each of the 17 species were aligned using ClustalX<sup>68</sup> (version 1.83) and concatenated. A phylogeny was built with MEGA5 using neighbor-joining (NJ) and maximum likelihood (ML) methods (500 replicas for the bootstrapping test). The two types of trees had identical topologies (Supplementary Fig. S8).

The result clearly shows that while *M. martensii* is morphologically conserved, its gene sequences diverged at a rate comparable to (or even faster than) those of the sampled insect species, a pattern similar to that observed with the gene family gain/loss analysis.

### **Orthologous clustering and comparative genomics**

Considering that *D. pulex* and *T. urticae* are the two sequenced species most closely related to *M. martensii*, we compared the gene sets of three species to identify homologous genes (all-against-all blastp, and E-value cutoff of 1E-5). *M. martensii* contains 14,298 genes that have homologs in the *D. pulex* genome, and 4,241 pairs among this set were identified as both best hit (BBH) gene pairs. The numbers of homologous genes and BBH genes between *M. martensii* and *T. urticae* are similar with those between *M. martensii* and *D. pulex*.

The gene families for the 11 species (*Aedes aegypti*, *Drosophila melanogaster*, *Tribolium castaneum*, *Camponotus floridanus*, *Acyrtosiphon pisum*, *Daphnia pulex*, *Mesobuthus martensii*, *Tetranychus urticae*, *Caenorhabditis elegans*, *Ciona intestinalis*, and *Homo sapiens*), were identified using OrthoMCL<sup>53</sup> clustering. All sequences were processed with orthomclFilterFasta to eliminate poor-quality sequences. The filter is based on length and percent stop codons according to the orthoMCL standard protocol. An all-versus-all BLAST search was performed with threshold setting at 1E-5 for the E-value. In total, 32,016 gene families were identified in all species, whereas 5,947 gene families and 3,211 orphan genes were identified in the proteome genome of *M. martensii* using default parameters for MCL clustering ( $I = 3.0$ ) (<http://www.genoport.org/mm/gene-family-v1.0.txt>).

The definition of gene family classes are as the followings:

(A) Lineage-specific gene families: these *M. martensii* families that contains no gene from other species were defined as *Mesobuthus/Scorpiones* lineage specific families.

(B) Shared gene families: these *M. martensii* families that contains homology genes from other species were defined as shared families.

(C) Gain of a gene family: For a species, there exists at least one member of the gene family, but none in any other species studied.

(D) Loss of a gene family: For a species, member(s) of a gene family exist in both the neighboring branch and the out-group, but none exists in itself. According to this standards, the loss of a gene family was defined as the process of gene family lost in the period of evolution from the most recent common ancestor (MRCA).

The events of gene family gain and loss for extant species were identified according to the definition above. The gene family list of their most recent common ancestor can be inferred as (1) consisting of the common gene families shared by its two direct descendants, (2) plus the gene families shared by one of the direct descendants and the out-group. The gene family lists of all ancestor nodes in the phylogenetic tree were inferred with their direct descendants through the lineage, starting from the extant species. As a result, the MRCA of *A. aegypti* and *D. melanogaster* has 6,595 gene families; the MRCA of *A. aegypti*, *D. melanogaster* and *T. castaneum* has 6,604 gene families; the MRCA of *Aedes aegypti*, *D. melanogaster*, *T. castaneum* and *C. floridanus* has 6,865 gene families; the common ancestor of insects (CAoI) has 6,802 gene families, the number of gene families of MRCA of insecta and *D. pulex* is 6,811. The MRCA of *M. martensii* and *T. urticae* has 5,842 gene families. Out of these 5,842 gene families, 1,302 ones were lost through the evolution, and other 1,407 ones were gained in *M. martensii* (Fig.1b). The MRCA of arthropoda has 6,750 gene families.

From the above process, the gene family list of any node (including ancestors and extant species) was constructed. In addition, the gene family gain and loss from an ancestor node to a descendant node can be inferred according to the definition (C) and (D) by comparing the gene family list of the two related nodes. A gain of gene family through the path is the gene family absent from the ancestor but present in the descendant. A loss of gene family through the path is the gene family absent from the descendant but present in the ancestor. Over the last ~400 million years, the *Mesobuthus* lineage has a gene family turn-over of 2,709 (1,407+1,302). We computed the gene family turn-over value for each insect lineage from the common ancestor of insects (CAoI). The gene family turn-over from CAoI to *Aedes aegypti* is 2,398; the gene family turn-over from CAoI to *Drosophila melanogaster* is 2,698; the gene family turn-over from CAoI to *Tribolium castaneum* is 1,759; the gene family turn-over from CAoI to *C. floridanus* is 1,502; the gene family turn-over from CAoI to *A. piium* is 2,047. These results clearly show that comparing to these sampled insect lineages, the *Mesobuthus* lineage has a greater gene family turn-over despite its apparent conservation in morphological evolution.

## **Supplementary Note 3 Expansion of shared and lineage-specific gene families**

### **Expansion of *M. martensii* gene families**

Gene family expansions in the *M. martensii* genome were studied based on the homologous gene families of predicted genes. The gene families existing in at least three species besides *M. martensii* were considered. The z-score of each gene family was calculated by: (the gene number for each family - the average gene number of the family from all species) / the standard divergence of gene numbers of the family from all species. The families with z-scores  $\geq 2$  were extracted, which represents significantly expanded gene families in *M. martensii*. As a result, 496 gene families in *M. martensii* were identified as significantly expanded gene families. In contrast, *T. urticae* has only 172 gene families with a z-score  $\geq 2$ .

The numbers of expanded gene families and large gene families in other species were listed in Supplementary Table S10. The most significantly expanded gene families were acetyl-CoA acyltransferase, DnaJ homolog subfamily C member 11, phospholipase like protein family, histone-lysine N-methyltransferase SETMAR, abhydrolase domain-containing protein 11, and et al. (Supplementary Table S11). Besides the significant expanded families, there exist 90 largely expanded gene families in *M. martensii*, which contain over 20 numbers in each family and exist in less than three species including *M. martensii*. The function of most of these large gene families in *M. martensii* remains unknown. The annotation of expanded gene families and large gene families could be found in supplementary files (<http://www.genoport.org/mm/expanded&large-family-annotatino-v1.0.xlsx>).

From the comparison, we conclude that while generally *Daphnia* and *Mesobuthus* have similar number of genes and their distributions of gene family size are quite similar as well, *Mesobuthus* has on average a larger gene family size than *Daphnia* and higher number of families with 100+ members. This confirms a general trend (that can also be drawn from Fig. 1b of this text): *Daphnia* has more expanded families that on average are less expanded, and *Mesobuthus* has fewer families that on average are more expanded. We looked closely at those most expanded families in *Daphnia* and *Mesobuthus*. We found there is no overlapping of most expanded families between the two. While the expanded families in *Daphnia* concentrate in protocadherin family, aldehyde dehydrogenase family, ATP-binding cassette sub-family, long chain fatty acid CoA ligase, coronin family, flavin-containing monooxygenase, calcium release-activated calcium channel protein, and clathrin heavy chain protein family, they in *Mesobuthus* concentrate in transposase, histone-lysine N-methyltransferase, phospholipase like protein family, ryanodine receptor, ubiquitin carboxyl-terminal hydrolase, FKBP12-rapamycin complex-associated protein family, E3 ubiquitin-protein ligase, and calcitonin receptor-like protein family (Supplementary Fig. S9).

### **Synonymous mutation of gene paralog in *M. martensii***

Paralogy genes from *M. martensii* were identified with BLAST program, using default parameters, setting the cutoff of E-value as  $1E-5$ . For pairwise alignment results, there gene pairs with identity  $> 70\%$  and alignment length  $> 70$  amino acid were considered as potential gene paralogs. The evolution divergence (number of synonymous substitutions per synonymous site or  $K_s$ ) between paralogs was

estimated with codeml program from PAML package<sup>50</sup>, using maximum-likelihood method. According to John K. Colbourne's protocol<sup>13</sup>, the Ks values were corrected by multiply the ratio between the alignment length and the length of the alignment minus the conversion tract. The synonymous rates of gene families in *M. martensii* were estimated by using the average Ks of gene paralogs in each family.

The same protocol was performed on the gene set from *T. urticae* and *D. pulex*. To investigate the differential duplicate rates among these three species, the number of single duplicated paralogs within the youngest cohort ( $K_s < 0.01$ ) was calculated. The gene birth rate was estimated by: number of youngest single duplicate gene pairs / (the number of single copy genes + the number of single duplicate gene pairs)<sup>13</sup>. The gene birth rate of *M. martensii* genome (0.076) is 68% of that in *D. pulex* genome (0.113), and is 7 times of that in *T. urticae* genome (0.011).

## **Supplementary Note 4. Genetic diversity of venom neurotoxins and their receptors**

### **Biodiversity of neurotoxin genes**

All reported scorpion neurotoxins were retrieved and collected from the GenBank (<http://www.ncbi.nlm.nih.gov/genbank/>) and EMBL (<http://www.ebi.ac.uk/embl/>) sequence databases. A total of 490 scorpion neurotoxins were obtained from both databases. With these sequences, a scorpion neurotoxin query set was constructed and used in a tblastn search against the *M. martensii* genome. E-values less than  $10^{-4}$  were used as a cut-off for significant hits of candidate neurotoxin genes. Each hit was further verified manually, based on the similarity of their sequences, cysteine patterns, and gene structural organizations. Neurotoxin homologs in *M. martensii* were classified into four families, including NaTx (toxins for sodium channels), KTx (toxins for potassium channels), ClTx (toxins for chloride channels), and CaTx (toxins for ryanodine receptors). A total of 116 neurotoxin genes were found in *M. martensii*, including 61 NaTx, 46 KTx, 5 ClTx, and 4 CaTx. They were named following the traditional nomenclature, and annotated on the *M. martensii* genome (Supplementary Table S12 and Supplementary Fig. S10). Forty-five are novel neurotoxins (21 NaTx, 18 KTx, 3 ClTx, and 3 CaTx) that were newly discovered and characterized in *M. martensii* (Supplementary Figs. S11 to S14). A similar approach was used to analyze the transcriptome of scorpion tails. Out of 116 neurotoxins genes found in the *M. martensii* genome, 109 (94%) were confirmed to be expressed in its venomous gland.

### **Organization and structure of neurotoxin genes**

By comparison of neurotoxins' cDNAs to their corresponding genomic sequences, the genomic organization and structure of the neurotoxin genes were clarified.

The neurotoxin genes contained one, two, or none intron. The form with one intron and two exons represents the majority of neurotoxin genes: the first exon spans the 5'

untranslated region and the stretch encoding the first two-thirds of the signal peptide, whereas the second exon encodes the last third of the signal peptide, the mature neurotoxin, and the 3' untranslated region. As the two main components of scorpion venoms, although the NaTx neurotoxins share similar genomic organization and structure with the KTx neurotoxins, the NaTx and KTx neurotoxins show some differences on the genomic level. The intron sizes of NaTx neurotoxin genes were generally greater than 400 bp in length, significantly longer than those of KTx neurotoxin genes (<200 bp) (Supplementary Figs. S15 and S16). The scaffold location analysis of neurotoxin genes indicated that they exist in cluster on the *M. martensii* genome. The clustered neurotoxin genes were summarized in Supplementary Table S13.

### **New defensin genes and their structural organization**

Previously, 14 defensin peptides were isolated and identified from the hemolymph and venom glands of scorpions<sup>69-71</sup>. These peptide sequences were used for a tblastn search against the *M. martensii* genome. E-values less than  $10^{-4}$  were taken to represent significant hits of similarity during the sequence search. As a result, we discovered six new defensin genes (i.e., BmKDfsin1, BmKDfsin2, BmKDfsin3, BmKDfsin4, BmKDfsin5, and BmKDfsin6) in the *M. martensii* genome (Supplementary Table S14 and Supplementary Fig. S17). Further sequence analysis showed that all six defensin genes in *M. martensii* had one phase-I intron with a GT-AG splicing rule located at the end of signal peptide coding region, which shared the same genomic organization and structure as the NaTx and KTx neurotoxins (Supplementary Fig. S18). Interestingly, the intron sizes of the six defensin genes were 398 bp, 147 bp, 131 bp, 128 bp, 416 bp, and 104 bp, respectively. Two defensin genes (i.e., BmKDfsin1 and BmKDfsin5) from *M. martensii* have similar intron lengths to those of the NaTx neurotoxin genes (Supplementary Figs. S15 and S18), whereas the remaining four defensin genes (i.e., BmKDfsin2, BmKDfsin3, BmKDfsin4, and BmKDfsin6) had similar intron lengths as those of the KTx neurotoxin genes (Supplementary Figs. S16 and S18). The scaffold location analysis of defensin genes indicated that at least four of the six defensin genes cluster on the scorpion genome (Supplementary Table S13).

### **Origin and evolution of neurotoxin genes**

One hundred and sixteen genes encoding putative scorpion neurotoxins were characterized in the genome of *M. martensii*. We searched the NCBI NR database for homologs of scorpion neurotoxin genes, and none were found from species other than scorpions. These results suggest that these neurotoxin genes evolved independently within scorpions. These genes were grouped into four families through functional annotations. The most diversified families are NaTx and KTx neurotoxins, with 61 and 46 genes in the genome, respectively. Among the 116 neurotoxin genes, the NaTx and KTx groups account for more than 92%, representing the two main active components of the scorpion venom arsenal for defense.



To investigate the origin and evolution of neurotoxin genes in *M. martensii*, 54 NaTx, 41 KTx, and 5 ClTx near full-length neurotoxin genes were selected together with 6 defensin genes to perform phylogenetic analysis. We attempted to build a phylogenetic tree to infer their phylogeny using the NJ, ML, or UPGMA method. These efforts were hindered by the difficulty in producing informative multiple sequence alignments of the neurotoxin genes due to the short sequence lengths of the molecules and the large divergence at each amino acid position. Alternatively, hierarchical clustering<sup>17,72</sup> was used to group the related neurotoxin genes. Each pair of neurotoxin genes was compared and an alignment score was used to represent the similarity between the pair of sequences. Hierarchical clustering was performed based on the pairwise similarity matrix of the neurotoxin genes using the stats package from R (version 2.11.1, <http://www.r-project.org/>).

### **Resistance of *M. martensii* to its own venom**

The resistance of the scorpion *Androctonus australis* to its own venom suggested that the venom from *A. australis* was pharmacologically inactive on the voltage-sensitive K<sup>+</sup> and Na<sup>+</sup> channels of its own muscle and nerve cells<sup>18</sup>. Here, an acute poisoning experiment was carried out with the scorpion *M. martensii* and the cockroach *Blaptica dubia*. Scorpion and cockroach individuals fed in the lab for 1 month to allow adaptation to the experimental environment. All animals were healthy adults. The venom of *M. martensii* was obtained by electrical stimulation of adult individuals (average venom production of an adult scorpion: 1-2 µl) and immediately kept in a 4°C icebox. Eighty cockroaches were randomly selected into eight groups (10 per group). Each group was injected with water (control) or with one of seven doses of fresh venom: 1/2 µl, 1/4 µl, 1/8 µl, 1/16 µl, 1/32 µl, 1/64 µl, 1/128 µl. Meanwhile, 30 scorpions were randomly selected into three groups (10 per group). Each group was injected with water (control), or 10 µl or 5 µl fresh venom. Animals were singly fed and observed for 24 hours after ventral subcutaneous injection of the venom. The number and course of animal death were recorded. Statistical analysis of the data was carried out using Microsoft Excel version 2007 to determine median lethal dose (LD<sub>50</sub>). Measurement data were expressed as the mean ± standard deviation (SD), and the Student's *t* test was used for two-group comparisons. The LD<sub>50</sub> value of fresh venom injected into *B. dubia* was 0.055 µl/g, 100 times lower than that of *M. martensii* (LD<sub>50</sub> > 5.56 µl/g). The experimental results demonstrated the resistance of *M. martensii* to its own venom (Supplementary Tables S15 and S16).

### **Cloning and sequencing of the scorpion K<sup>+</sup> ion channels**

Based on the annotated *M. martensii* genome, two K<sup>+</sup> ion channel gene homologs (MmKv1 and MmKv2) were identified and found to be expressed (Supplementary Fig. S19). To investigate the electrophysiological function of the scorpion K<sup>+</sup> ion channels, we used reverse transcription-polymerase chain reaction (RT-PCR) to clone full-length cDNAs encoding MmKv1 and MmKv2. Total RNA was prepared from *M. martensii* using the method described in S2.1.2. RNA quantitation was performed by UV absorbance, and quality was further confirmed by gel electrophoreses. First-strand

cDNA was synthesized from *M. martensii* total RNA using random hexamers (AP Biotech, Germany) and SuperScriptII reverse transcriptase according to the manufacturer's protocol (Invitrogen). The cDNAs of MmKv1 and MmKv2 were amplified by PCR. The PCR products were cloned into the pTZ57R/T TA cloning vector (Fermentas, USA). *E. coli* were transformed with the cloning vector and allowed to grow. DNA was extracted from the bacterial cultures and isolated PCR inserts were sequenced in both directions with an ABI 3100 sequencer (Applied Biosystems, Foster City, CA, USA).

### **Expression and electrophysiological recordings**

The cDNAs encoding MmKv1 and MmKv2 were subcloned into the *XhoI/BamHI* sites of the pIRES2-EGFP vector (Clontech, USA) and transiently transfected into HEK293 cells (CCTCC, China) using the FuGene Transfection Reagent (Roche Diagnostics, Switzerland). The ion channel currents were measured 1-3 days after transfection. To measure the Kv channel currents, the internal pipette and external solutions were prepared according to the previous procedure<sup>51,52</sup>. The voltage-gated K<sup>+</sup> channel currents were elicited by 200-ms depolarizing voltage steps from the holding potential of -80 mV to +50 mV. The formation of functional K<sup>+</sup> channels in MmKv1 or MmKv2 transfected cells was verified by blocking their currents with TEA (Sigma, USA), XE-991 (Tocris Bioscience, USA), or scorpion toxin ChTX (Alomone, Jerusalem, Israel) (Supplementary Fig. S20). As a comparison, the mouse K<sup>+</sup> channel mKv1.3 was transiently transfected into HEK293 cells and its pharmacological activity was detected by the addition of *M. martensii* venom or ChTX.

## **Supplementary Note 5. Genetic basis for photosensor function in the tail**

### **Genes involved in phototransduction in the genome**

Sequence similarity searches against predicted proteins of the *M. martensii* genome were performed by blastp using 25 *Drosophila* genes described to be involved in visual signal transduction (<http://www.flybase.org>) as “bait.” E-values less than 10<sup>-4</sup> and scores greater than 200 were considered significant hits. Each hit gene from *M. martensii* was manually checked against the NCBI GenBank database (Supplementary Table S17). Homologs of *Drosophila* light signal transduction gene were found in the genome of *M. martensii*. Particularly, three opsin-homologous genes (Mmopsin1, Mmopsin2, and Mmopsin3) were identified according to the NCBI domain database (<http://www.ncbi.nlm.nih.gov/Structure/cdd/cdd.shtml>).

### **Expression of phototransduction genes in scorpion tails**

Although scorpions have median and lateral eyes<sup>73,74</sup>, their eyes may not adequately function in the generation of visual images. The limited functions of scorpion eyes

may be complemented by light sensitivity in the tail Anatomically, a ventral nerve cord runs from the central nervous system in the brain to the venom apparatus in the tail (Supplementary Fig. S23). Subsequently, we performed tblastn searches of the scorpion tail transcriptome using 25 *Drosophila* genes involved in visual signal transduction (<http://www.flybase.org>). E-values less than 1E-4 and scores greater than 200 were taken to represent significant hits of similarity. Most of the visual signal transduction pathway genes were found to be expressed in the scorpion tails (Supplementary Table S18).

### **Quantitative expression analysis of phototransduction pathway genes**

Total RNA samples for quantitative PCR (qPCR) verification were prepared by dissecting three separate tissues, that is, the prosoma (head with eyes), vesicle (tail or telson), and muscle, as described in S2.1.2. First-strand cDNA was synthesized from 1 µg total RNA using random hexamers (AP Biotech) and SuperScriptII reverse transcriptase according to the manufacturer's protocol (Invitrogen). The qPCR primers were designed for 14 important phototransduction genes, according to their sequences obtained from genome and transcriptome analyses (Supplementary Table S19), and were synthesized at the Tsingke Biotechnology Limited Company (Wuhan, China). The qPCR assays were performed using SYBR ReadyMix (Sigma) and an ABI 7500HT real-time PCR system. Combined with the tail transcriptome analysis of light signal transduction pathway genes, the qPCR results confirmed that the scorpion tail tissues express all checked genes involved in the phototransduction pathway (Supplementary Fig. S22).

### **Evolution and light-wavelength bias of opsins**

Opsin proteins are essential molecules in mediating the light signal transduction, which inputs a light signal to initiate phototransduction<sup>75,76</sup>. Based on the annotated genome and tail transcriptome from *M martensii*, three opsin homologs (Mmopsin1, Mmopsin2, and Mmopsin3) were found in *M martensii*. Mmopsin1 and Mmopsin2 have high homology to eye-related rhabdopsins and were only expressed in the prosoma of scorpion, whereas Mmopsin3, with low similarity to eye-related rhabdopsins, was highly expressed in both scorpion eyes and tails. To further study Mmopsin3, we retrieved from GenBank the sequences of two melanopsins from *Drosophila* (DroMel\_rh5, and DroMel\_rh7), two opsins from bee (*Apis\_opsinblue*, and *Apis\_lwave*), one opsin from *Hydra* (*Hydra\_opsin1*), one opsin from *Pediculus* (*Pediculus\_rh11*), one opsin from *Nematostella* (*Nematostella\_opsin1*), and one opsin from *Branchiostoma* (*Branchiostoma\_opsin4*). Multiple sequence alignments of the opsins were carried out using ClustalX 1.83 and adjusted manually, and the result showed that Mmopsin3 shared seven conserved transmembrane domains with the other opsin proteins (Supplementary Fig. S21).

To understand the evolutionary relationship of the three opsins from scorpion, we performed a phylogenetic analysis using opsin proteins from inferior invertebrates and insects, which were downloaded from the NCBI (<http://www.ncbi.nlm.nih.gov>) and

UCSC                      Genome                      Browser                      Wiki                      sites

([http://genomewiki.ucsc.edu/index.php/Main\\_Page](http://genomewiki.ucsc.edu/index.php/Main_Page), Supplementary Table S20). One hundred and four opsin protein sequences were used to construct the phylogenetic tree following the methods described in S2.1.2.

In order to study the spectrum bias of the three opsins from the scorpion *M. martensii*, we extracted sequences for 47 opsins with known light-wave length of sensitivity from the UCSC Genome Browser Wiki site ([http://genomewiki.ucsc.edu/index.php/Main\\_Page](http://genomewiki.ucsc.edu/index.php/Main_Page)). A phylogeny tree was then constructed for them. The light-wave length bias analysis indicated that Mmopsin3 is sensitive to short waves (UV to blue), but both Mmopsin1 and Mmopsin2 are the members of the long-wave-sensitive opsin family. The spectrum sensitivity of Mmopsin3 agrees well with previously documented scorpion behavioral results under different wave-lengths. It was previously shown that scorpions with blocked eyes were more likely to react to wave-length at 395 nm (long UV) than to at 505 nm (cyan-green)<sup>26</sup>. The tails of *Urodacus* (a scorpion species) had the spectral sensitivity in the range from 400 nm to 480 nm<sup>8</sup>.

## **Supplementary Note 6. P450 genes in detoxification, fluorescence and hormone biosynthesis**

### **CYP genes encoding P450 enzymes**

Cytochrome P450 genes comprise a large and diverse superfamily found in most classes of organisms. After the *M. martensii* genome was annotated as described in Supplementary Note 1, we searched for the homologs of CYP genes encoding P450 enzymes and found 160 homologues of CYP genes in *M. martensii*. They belong to the CYP 2, 3, 4, and mitochondrial clans, similar to the four clans found in other sequenced protostome genomes<sup>29,77</sup>. All 160 CYP genes were systematically classified according to their P450 characteristics (Supplementary Table S21). The CYP 2, 3, 4, and mitochondrial clans in *M. martensii* had 12, 76, 61, and 11 members, respectively. Thus, the CYP 3 and 4 clans were significantly expanded in *M. martensii* (Supplementary Table S22). The scaffold location analysis of CYP genes indicated that they exist in cluster on the *M. martensii* genome. The clustered CYP genes were summarized in Supplementary Table S23.

### **Coumarin and its derivatives**

The extraction of fluorescent compounds from *M. martensii* was performed according to Forest et al.<sup>10</sup>. Briefly, 100 adult *M. martensii* individuals were immersed in 300 ml 75% ethanol (v:v) solution and kept under room temperature for more than 12 months. The fluorescence from the extract solution was observed under UV light, which indicated that the fluorescent substance was soluble in 75% ethanol.

The chemical standards, coumarin, 7-hydroxy-coumarin, and 4-methyl-7-hydroxy-coumarin were purchased from Sigma (USA) as the reference control. Reverse-phase high-performance liquid chromatography (HPLC) with a C18

column (10 mm × 250 mm, 5 μm, DaLian Elite, China) was performed to collect fractions containing coumarin, 7-hydroxy-coumarin, or 4-methyl-7-hydroxy-coumarin. Buffer A was 0.1% trifluoroacetic acid in water, and buffer B was 80% methanol in water. The flow rate was 5ml/min. Fractions were collected every 0.5 min throughout the gradient elution. The fluorescence of each HPLC fraction was measured using a fluorimeter at 350 nm. The HPLC fractions were lyophilized and resolved in methanol.

Analysis of coumarin, 7-hydroxy-coumarin, and 4-methyl-7-hydroxy-coumarin was performed on the HPLC-electrospray ionization-tandem mass spectrometry (ESI-MS/MS) system consisting of an AB 3200 QTRAP liquid chromatography (LC)-MS/MS (Applied Biosystems) with an ESI source (Turbo Ionspray) and a Shimadzu LC-20 AD HPLC (Tokyo, Japan) system. Data acquisition and processing were performed using Analyst 1.5 software (Applied Biosystems). The HPLC separation was performed on a Shim-pack VP-ODS (150 mm × 2.0 mm i.d., 5 mm) column from Shimadzu. A mixture of 0.1% formic acid and 70% methanol in water (v/v) was used as the mobile phase with isocratic elution. The flow rate was set to 0.2 ml/min. The analysis was performed in multiple reaction monitoring (MRM) mode by monitoring a transition pair of  $m/z$  147.2 (molecular ion)/103.2 (fragment ion) for coumarin,  $m/z$  163.0/107.1 for 7-hydroxy-coumarin, and  $m/z$  177.1/105.1 for 4-methyl-7-hydroxy-coumarin, and a scan time of 200 ms for each pair. The optimized ESI conditions were as follows: curtain gas flow, 40 psi; collision activated dissociation gas flow, medium; Turbo Ionspray voltage, + 5,500 V; turboprobe temperature, 450°C; nebulizer gas flow, 50 psi; heater gas flow, 65 psi; declustering potential voltage, 20 V; entrance potential voltage, 4 V; collision energy, 20 V; and collision cell exit potential, 5 V.

To address the question that 4-methyl-7-hydroxy-coumarin may degrade into 7-hydroxy-coumarin or coumarin, we analyzed the ethanol solution of the chemical standard for 4-methyl-7-hydroxy-coumarin which was prepared in May 2012. As shown in the figure (Supplementary Fig. S28), we detected neither 7-hydroxy-coumarin nor coumarin in the ethanol solution of the 7-hydroxy-4-methylcoumarin standard (stored for more than one year) on September 5, 2013. The analysis was performed by LC-ESI-MS/MS in multiple reaction monitoring (MRM) mode by monitoring a transition pair of  $m/z$  147.2/103.2 for coumain,  $m/z$  163.0/107.1 for 7-hydroxycourmain and  $m/z$  177.1/105.1 for 4-methyl-7-hydroxy-coumarin. These data support the presence of all three compounds in the cuticles.

### **CYP genes involved in juvenile and molting hormone biosynthesis**

In most insect species, hormones regulate critical physiological processes such as metamorphosis and reproduction, in which ecdysone initiates molting or ecdysis, and juvenile hormone controls major developmental transitions from egg to larva, larva to pupa, and pupa to adult. There are very few reports of the hormonal regulation of development and reproduction in arachnids<sup>78</sup>.

We performed KEGG mapping using the sequence data from the *M. martensii* genome. The results of KEGG mapping showed that *M. martensii* has key

biosynthesis-related genes for both juvenile and molting hormone biosynthesis: Jhamt, Nvd, CYP307A1/2 (Spo/Spok), CYP306A1 (Phm), CYP302A1 (Dib), CYP315A1 (Sad), CYP314A1, and CYP18A1 (Supplementary Table S24 and Supplementary Fig. S29). We further identified CYP306A1 and CYP18A1 manually by performing blastp searches of the predicted proteins from *M. martensii* using the *Drosophila* CYP306A1 and CYP18A1 genes (<http://www.flybase.org>). For the biosynthesis pathway of juvenile hormone, *M. martensii* had the Jhamt homolog but not the ortholog of CYP15A1, which was consistent with that of the spider mite *T. urticae*, the only other sequenced chelicerate. The result suggests that *M. martensii* has only methyl farnesoate (MF), but not juvenile hormone III. On the other hand, *M. martensii* has the genes of complete biosynthetic-metabolic pathway for molting hormone ecdysone 20E: Nvd, CYP307A1/2, CYP306A1, CYP302A1, and CYP315A1, whereas CYP314A1 and CYP18A1 function to degrade the molting hormone (Supplementary Fig. S29). These results shed light on the biosynthesis and metabolism of scorpions' hormones.

## Supplementary References

- 57 Felsenstein, J. Evolutionary trees from DNA sequences: a maximum likelihood approach. *Journal of molecular evolution* **17**, 368-376 (1981).
- 58 Qi, J. X., Zhu, M. S. & Lourenço, W. R. Redescription of *Mesobuthus martensii martensii* (Karsch, 1879) (scorpiones: buthidae) from China. *Revista Ibérica de Aracnología* **10**, 137-144 (2004).
- 59 Li, W. S. The meiosis and karyotype of male *Mesobuthus martensii*. *Sichuan Journal of Zoology* **10**, 18-19 (1991).
- 60 Vindelov, L. L., Christensen, I. J. & Nissen, N. I. Standardization of high-resolution flow cytometric DNA analysis by the simultaneous use of chicken and trout red blood cells as internal reference standards. *Cytometry* **3**, 328-331 (1983).
- 61 Arumuganathan, K. & Earle, E. D. Nuclear DNA content of some important plant species *Plant Molecular Biology Reporter* **9**, 208-218 (1991).
- 62 Stanke, M., Schoffmann, O., Morgenstern, B. & Waack, S. Gene prediction in eukaryotes with a generalized hidden Markov model that uses hints from external sources. *BMC bioinformatics* **7**, 62 (2006).
- 63 Blanco, E., Parra, G. & Guigó, R. *Using geneid to Identify Genes*. (John Wiley & Sons Inc., 2002).
- 64 Harris, M. A. *et al.* The Gene Ontology (GO) database and informatics resource. *Nucleic acids research* **32**, D258-261 (2004).
- 65 Genome sequence of the pea aphid *Acyrtosiphon pisum*. *PLoS biology* **8**, e1000313 (2010).
- 66 Trapnell, C., Pachter, L. & Salzberg, S. L. TopHat: discovering splice junctions with RNA-Seq. *Bioinformatics (Oxford, England)* **25**, 1105-1111 (2009).
- 67 Trapnell, C. *et al.* Differential gene and transcript expression analysis of RNA-seq experiments with TopHat and Cufflinks. *Nat Protoc* **7**, 562-578 (2012).
- 68 Thompson, J. D., Gibson, T. J. & Higgins, D. G. Multiple sequence alignment using ClustalW and ClustalX. *Curr Protoc Bioinformatics* **Chapter 2**, Unit 2 3 (2002).
- 69 Ehret-Sabatier, L. *et al.* Characterization of novel cysteine-rich antimicrobial peptides from scorpion blood. *The Journal of biological chemistry* **271**, 29537-29544 (1996).
- 70 Rodriguez de la Vega, R. C. *et al.* Antimicrobial peptide induction in the haemolymph of the Mexican scorpion *Centruroides limpidus limpidus* in response to septic injury. *Cell Mol Life Sci* **61**, 1507-1519 (2004).
- 71 D'Suze, G., Schwartz, E. F., Garcia-Gomez, B. I., Sevcik, C. & Possani, L. D. Molecular cloning and nucleotide sequence analysis of genes from a cDNA library of the scorpion *Tityus discrepans*. *Biochimie* **91**, 1010-1019 (2009).

- 72 Glazko, G. V. & Mushegian, A. R. Detection of evolutionarily stable fragments of cellular pathways by hierarchical clustering of phyletic patterns. *Genome Biol* **5**, R32 (2004).
- 73 Hjelle, J. T. *Anatomy and morphology*. (Stanford University Press, 1990).
- 74 Root, T. M. *Neurobiology*. (Stanford University Press, 1990).
- 75 Porter, M. L. *et al.* Shedding new light on opsin evolution. *Proc Biol Sci* **279**, 3-14 (2011).
- 76 Fain, G. L., Hardie, R. & Laughlin, S. B. Phototransduction and the evolution of photoreceptors. *Curr Biol* **20**, 114-124 (2010).
- 77 Nelson, D. R. Cytochrome P450 and the individuality of species. *Arch Biochem Biophys* **369**, 1-10 (1999).
- 78 Rees, H. H. Hormonal control of tick development and reproduction. *Parasitology* **129 Suppl**, S127-143 (2004).
